# Supplementary material
Source: publisher site journal article supplement (https://www.dovepress.com/article/supplementary_file/562027/562027%20Revised%20Supplementary%20Materials.xlsx)
Supplement: Supplementary file 1 [file 562027%20Revised%20Supplementary%20Materials.xlsx]

## Sheet: Supplementary Table 1 
Supplementary Table 1. The SNPs information associated with exposure datasets (circulating inflammatory cytokines) that have a causal association with outcome measures (IVDD, OP)
chr.exposure	pos.exposure	effect_allele.exposure	other_allele.exposure	beta.exposure	se.exposure	eaf.exposure	pval.exposure	SNP	samplesize.exposure	id.exposure	exposure	mr_keep.exposure	pval_origin.exposure
2	31896839	T	C	0.2769	0.0557	0.9745	6.65e-07	rs13001788	8243	GCST90274811	Interleukin-2 receptor subunit beta levels	TRUE	reported
2	132287028	A	G	-0.4845	0.102	0.0085	2.03e-06	rs115803849	6779	GCST90274811	Interleukin-2 receptor subunit beta levels	TRUE	reported
2	171243489	A	G	0.232	0.0502	0.9786	3.81e-06	rs115890206	10403	GCST90274811	Interleukin-2 receptor subunit beta levels	TRUE	reported
4	108118301	T	C	0.0631	0.0129	0.5622	1e-06	rs17549820	11791	GCST90274811	Interleukin-2 receptor subunit beta levels	TRUE	reported
4	108118499	A	G	-0.0609	0.013	0.4358	2.8e-06	rs17484004	11787	GCST90274811	Interleukin-2 receptor subunit beta levels	TRUE	reported
4	108118615	A	G	-0.0607	0.013	0.4367	3.02e-06	rs17484032	11786	GCST90274811	Interleukin-2 receptor subunit beta levels	TRUE	reported
4	136755243	A	G	-0.2101	0.0441	0.025	1.9e-06	rs116007066	10295	GCST90274811	Interleukin-2 receptor subunit beta levels	TRUE	reported
5	22599432	T	TA	-0.2288	0.0454	0.9611	4.66e-07	rs199629395	7943	GCST90274811	Interleukin-2 receptor subunit beta levels	TRUE	reported
6	131393771	A	C	-0.157	0.0325	0.9549	1.36e-06	rs9321271	11779	GCST90274811	Interleukin-2 receptor subunit beta levels	TRUE	reported
7	30337508	T	C	-0.6545	0.139	0.004	2.49e-06	rs2391851	7815	GCST90274811	Interleukin-2 receptor subunit beta levels	TRUE	reported
7	42118325	G	GT	-0.0797	0.0172	0.5149	3.59e-06	rs10709803	7943	GCST90274811	Interleukin-2 receptor subunit beta levels	TRUE	reported
7	98121843	C	G	0.0704	0.0144	0.346	1.01e-06	rs1472270	11344	GCST90274811	Interleukin-2 receptor subunit beta levels	TRUE	reported
11	6710340	G	GT	0.8211	0.1767	0.9952	3.37e-06	rs560220822	7456	GCST90274811	Interleukin-2 receptor subunit beta levels	TRUE	reported
11	36198233	T	C	-0.0721	0.0156	0.2619	3.8e-06	rs34246740	11344	GCST90274811	Interleukin-2 receptor subunit beta levels	TRUE	reported
11	40470032	T	C	-0.2471	0.0535	0.9783	3.86e-06	rs141460846	11304	GCST90274811	Interleukin-2 receptor subunit beta levels	TRUE	reported
12	13099222	CT	C	-0.0819	0.0176	0.5776	3.26e-06	rs372441966	7943	GCST90274811	Interleukin-2 receptor subunit beta levels	TRUE	reported
12	13099229	T	C	-0.0984	0.021	0.7599	2.79e-06	rs56353341	7943	GCST90274811	Interleukin-2 receptor subunit beta levels	TRUE	reported
12	65486288	G	GTA	0.0969	0.0211	0.2716	4.38e-06	rs144164448	7943	GCST90274811	Interleukin-2 receptor subunit beta levels	TRUE	reported
12	111592380	T	G	-0.1133	0.0239	0.0879	2.13e-06	rs2157876	11343	GCST90274811	Interleukin-2 receptor subunit beta levels	TRUE	reported
13	106109408	A	T	0.3764	0.0809	0.0166	3.28e-06	rs559991994	7943	GCST90274811	Interleukin-2 receptor subunit beta levels	TRUE	reported
15	84400416	A	G	-0.4602	0.0993	0.9916	3.58e-06	rs142733646	8717	GCST90274811	Interleukin-2 receptor subunit beta levels	TRUE	reported
15	84596551	A	G	0.2089	0.0441	0.0234	2.17e-06	rs11631703	11792	GCST90274811	Interleukin-2 receptor subunit beta levels	TRUE	reported
15	84604071	T	C	-0.2047	0.044	0.9765	3.28e-06	rs117392576	11792	GCST90274811	Interleukin-2 receptor subunit beta levels	TRUE	reported
15	84611805	T	C	0.2037	0.044	0.0235	3.66e-06	rs61752778	11792	GCST90274811	Interleukin-2 receptor subunit beta levels	TRUE	reported
15	84665328	T	C	-0.2102	0.0443	0.9766	2.09e-06	rs11630708	11788	GCST90274811	Interleukin-2 receptor subunit beta levels	TRUE	reported
16	80775714	A	G	-0.0606	0.0128	0.4465	2.2e-06	rs9921181	11786	GCST90274811	Interleukin-2 receptor subunit beta levels	TRUE	reported
16	81197117	A	G	0.2596	0.055	0.0267	2.36e-06	rs4889255	8891	GCST90274811	Interleukin-2 receptor subunit beta levels	TRUE	reported
17	4507431	T	C	0.1213	0.0261	0.0695	3.36e-06	rs117538197	11774	GCST90274811	Interleukin-2 receptor subunit beta levels	TRUE	reported
17	50117655	A	ATGAGTGCTCATGTTTGTTTTCCACTAG	-0.1508	0.0309	0.0967	1.06e-06	rs139302314	7943	GCST90274811	Interleukin-2 receptor subunit beta levels	TRUE	reported
19	1388862	T	C	-0.6949	0.1522	0.0035	4.98e-06	rs140236960	6751	GCST90274811	Interleukin-2 receptor subunit beta levels	TRUE	reported
2	3091471	T	C	0.0707	0.0153	0.3559	3.82e-06	rs11127419	9252	GCST90274819	Leukemia inhibitory factor levels	TRUE	reported
2	46125903	A	T	0.0993	0.0213	0.8758	3.13e-06	rs80092539	11345	GCST90274819	Leukemia inhibitory factor levels	TRUE	reported
2	52256839	T	TTATA	0.0835	0.0178	0.2375	2.72e-06	rs34649328	8389	GCST90274819	Leukemia inhibitory factor levels	TRUE	reported
2	222585468	A	G	-0.2119	0.0453	0.0321	2.9e-06	rs825264	10291	GCST90274819	Leukemia inhibitory factor levels	TRUE	reported
2	224292526	C	G	-0.3015	0.0631	0.9851	1.77e-06	rs116794364	10858	GCST90274819	Leukemia inhibitory factor levels	TRUE	reported
3	58954742	C	G	0.2548	0.0556	0.021	4.59e-06	rs145344087	10281	GCST90274819	Leukemia inhibitory factor levels	TRUE	reported
4	70363682	A	C	-0.8922	0.1944	0.0034	4.44e-06	rs183873700	8380	GCST90274819	Leukemia inhibitory factor levels	TRUE	reported
5	60295939	A	T	0.6861	0.1433	0.9934	1.69e-06	rs183296599	6672	GCST90274819	Leukemia inhibitory factor levels	TRUE	reported
5	118466775	A	G	0.7868	0.1562	0.0041	4.73e-07	rs189612511	6862	GCST90274819	Leukemia inhibitory factor levels	TRUE	reported
5	118479723	A	G	-0.7115	0.1493	0.9956	1.88e-06	rs189869800	6862	GCST90274819	Leukemia inhibitory factor levels	TRUE	reported
6	14914234	T	C	0.7794	0.1654	0.9951	2.45e-06	rs184182761	6862	GCST90274819	Leukemia inhibitory factor levels	TRUE	reported
6	54807732	A	G	-0.5361	0.1134	0.0067	2.27e-06	rs190281806	7816	GCST90274819	Leukemia inhibitory factor levels	TRUE	reported
8	109432178	A	T	0.0757	0.0158	0.6575	1.66e-06	rs13264315	9460	GCST90274819	Leukemia inhibitory factor levels	TRUE	reported
9	21571919	A	G	-1.0629	0.2079	0.9971	3.18e-07	rs143300810	6862	GCST90274819	Leukemia inhibitory factor levels	TRUE	reported
10	31475118	A	G	0.1714	0.0368	0.0346	3.2e-06	rs117691711	11788	GCST90274819	Leukemia inhibitory factor levels	TRUE	reported
10	31490202	A	G	0.1725	0.0367	0.0351	2.6e-06	rs74992559	11784	GCST90274819	Leukemia inhibitory factor levels	TRUE	reported
10	31647528	T	C	0.1787	0.0388	0.032	4.11e-06	rs78197729	11769	GCST90274819	Leukemia inhibitory factor levels	TRUE	reported
11	44567027	A	AGAGGT	-0.4135	0.0862	0.9881	1.61e-06	rs536965133	7456	GCST90274819	Leukemia inhibitory factor levels	TRUE	reported
12	28794653	T	C	0.5484	0.1129	0.9931	1.19e-06	rs578146649	8718	GCST90274819	Leukemia inhibitory factor levels	TRUE	reported
12	68026044	A	T	-0.3084	0.0661	0.0168	3.08e-06	rs11608349	9362	GCST90274819	Leukemia inhibitory factor levels	TRUE	reported
12	68048908	T	C	-0.2467	0.0534	0.0256	3.84e-06	rs139471286	9362	GCST90274819	Leukemia inhibitory factor levels	TRUE	reported
14	97087097	A	G	-0.0635	0.0136	0.5456	3.02e-06	rs234592	11345	GCST90274819	Leukemia inhibitory factor levels	TRUE	reported
16	29777590	A	AT	0.1331	0.0291	0.1302	4.79e-06	rs34084384	6879	GCST90274819	Leukemia inhibitory factor levels	TRUE	reported
16	31454179	T	C	-0.776	0.1589	0.0157	1.04e-06	rs150422287	5540	GCST90274819	Leukemia inhibitory factor levels	TRUE	reported
16	33072062	A	G	0.3571	0.0779	0.033	4.56e-06	rs560755942	6257	GCST90274819	Leukemia inhibitory factor levels	TRUE	reported
17	28341679	T	G	0.0671	0.0143	0.486	2.7e-06	rs7225483	9849	GCST90274819	Leukemia inhibitory factor levels	TRUE	reported
17	28400516	A	C	-0.0668	0.0145	0.5433	4.09e-06	rs7207021	9849	GCST90274819	Leukemia inhibitory factor levels	TRUE	reported
19	6801966	A	G	0.112	0.0238	0.0899	2.53e-06	rs332426	11789	GCST90274819	Leukemia inhibitory factor levels	TRUE	reported
19	54851842	A	G	-0.1011	0.0197	0.1385	2.87e-07	rs11883375	11776	GCST90274819	Leukemia inhibitory factor levels	TRUE	reported
19	54852610	T	G	0.0897	0.0184	0.8371	1.09e-06	rs2004431	11786	GCST90274819	Leukemia inhibitory factor levels	TRUE	reported
1	18931322	T	C	0.1729	0.0371	0.0521	3.16e-06	rs116790447	9453	GCST90274810	Interleukin-24 levels	TRUE	reported
1	50832776	A	C	0.3126	0.0642	0.985	1.12e-06	rs150703020	10850	GCST90274810	Interleukin-24 levels	TRUE	reported
1	153060770	A	T	0.0762	0.0162	0.4768	2.55e-06	rs199770642	7943	GCST90274810	Interleukin-24 levels	TRUE	reported
1	236589268	A	G	-0.0799	0.017	0.471	2.6e-06	rs590815	7943	GCST90274810	Interleukin-24 levels	TRUE	reported
1	236592040	T	C	0.0815	0.0172	0.4915	2.15e-06	rs36183478	8587	GCST90274810	Interleukin-24 levels	TRUE	reported
4	54258991	T	C	0.83	0.1808	0.9967	4.42e-06	rs561332152	6942	GCST90274810	Interleukin-24 levels	TRUE	reported
5	149232308	A	G	-0.1318	0.028	0.0716	2.51e-06	rs2341294	9900	GCST90274810	Interleukin-24 levels	TRUE	reported
7	4973857	A	G	-1.0867	0.2101	0.0022	2.31e-07	rs558973346	6780	GCST90274810	Interleukin-24 levels	TRUE	reported
7	9959098	A	T	0.3063	0.0647	0.014	2.2e-06	rs145295031	11287	GCST90274810	Interleukin-24 levels	TRUE	reported
7	82649637	T	C	0.6472	0.1388	0.9932	3.12e-06	rs138546531	7506	GCST90274810	Interleukin-24 levels	TRUE	reported
7	155623090	A	G	0.0657	0.0136	0.4443	1.36e-06	rs167018	11336	GCST90274810	Interleukin-24 levels	TRUE	reported
8	126439217	T	C	0.8257	0.1803	0.9959	4.66e-06	rs190040512	6862	GCST90274810	Interleukin-24 levels	TRUE	reported
9	19587653	CT	C	-0.111	0.0241	0.8712	4.11e-06	rs60056157	7943	GCST90274810	Interleukin-24 levels	TRUE	reported
9	19588590	A	AGTT	0.1097	0.0236	0.1235	3.35e-06	rs561262626	8383	GCST90274810	Interleukin-24 levels	TRUE	reported
10	6122343	A	G	0.3005	0.0641	0.0145	2.76e-06	rs11256610	10850	GCST90274810	Interleukin-24 levels	TRUE	reported
10	10237166	T	C	-0.4766	0.0967	0.9858	8.28e-07	rs184964790	9497	GCST90274810	Interleukin-24 levels	TRUE	reported
11	76546584	T	C	-1.0953	0.2292	0.0019	1.76e-06	rs184502783	6780	GCST90274810	Interleukin-24 levels	TRUE	reported
12	8822245	T	G	-0.6512	0.1371	0.0145	2.04e-06	rs58860639	7008	GCST90274810	Interleukin-24 levels	TRUE	reported
12	8915715	A	G	0.7284	0.1455	0.9842	5.55e-07	rs2098245	7728	GCST90274810	Interleukin-24 levels	TRUE	reported
12	112829103	CAT	C	0.081	0.0167	0.4923	1.23e-06	rs71445573	7943	GCST90274810	Interleukin-24 levels	TRUE	reported
12	112883476	A	G	0.0655	0.0137	0.4172	1.74e-06	rs11066309	11336	GCST90274810	Interleukin-24 levels	TRUE	reported
12	112896840	A	AG	0.0839	0.0165	0.4174	3.68e-07	rs58235019	7943	GCST90274810	Interleukin-24 levels	TRUE	reported
14	49008543	A	G	0.3559	0.0757	0.0112	2.58e-06	rs79840297	9984	GCST90274810	Interleukin-24 levels	TRUE	reported
14	86024172	A	T	0.0892	0.0195	0.2392	4.78e-06	rs7401175	7943	GCST90274810	Interleukin-24 levels	TRUE	reported
14	97741799	A	G	-0.3	0.0657	0.9862	4.97e-06	rs117613902	10850	GCST90274810	Interleukin-24 levels	TRUE	reported
15	96300252	A	G	-0.4727	0.1031	0.98	4.54e-06	rs111733212	8710	GCST90274810	Interleukin-24 levels	TRUE	reported
16	49575164	A	G	-0.0886	0.0191	0.1398	3.51e-06	rs60306270	11781	GCST90274810	Interleukin-24 levels	TRUE	reported
18	59566972	T	C	-0.4806	0.1031	0.9913	3.14e-06	rs188514423	9197	GCST90274810	Interleukin-24 levels	TRUE	reported
19	50702190	A	G	-0.3786	0.0795	0.0105	1.91e-06	rs78511581	9786	GCST90274810	Interleukin-24 levels	TRUE	reported
21	26067535	A	G	0.2969	0.0644	0.0144	4.02e-06	rs143986178	10850	GCST90274810	Interleukin-24 levels	TRUE	reported
22	48661109	A	G	0.111	0.0207	0.1327	8.22e-08	rs73169406	11337	GCST90274810	Interleukin-24 levels	TRUE	reported
1	153069407	A	T	-0.0691	0.0148	0.4224	3.03e-06	rs11581933	9461	GCST90274808	Interleukin-20 receptor subunit alpha levels	TRUE	reported
1	153082377	A	C	-0.0817	0.0155	0.4221	1.36e-07	rs540645152	8814	GCST90274808	Interleukin-20 receptor subunit alpha levels	TRUE	reported
1	153082810	T	C	-0.0765	0.0154	0.4228	6.78e-07	rs28846828	8817	GCST90274808	Interleukin-20 receptor subunit alpha levels	TRUE	reported
1	165055882	T	G	0.0617	0.0135	0.5277	4.87e-06	rs4529689	11344	GCST90274808	Interleukin-20 receptor subunit alpha levels	TRUE	reported
1	168180874	C	G	0.119	0.0256	0.1039	3.34e-06	rs12138611	11344	GCST90274808	Interleukin-20 receptor subunit alpha levels	TRUE	reported
3	113013852	A	G	0.3626	0.075	0.0114	1.33e-06	rs544388667	9261	GCST90274808	Interleukin-20 receptor subunit alpha levels	TRUE	reported
4	165310535	T	C	1.0525	0.2206	0.9977	1.83e-06	rs547954008	6779	GCST90274808	Interleukin-20 receptor subunit alpha levels	TRUE	reported
5	46131995	T	C	-0.4166	0.091	0.0114	4.69e-06	rs143067549	7315	GCST90274808	Interleukin-20 receptor subunit alpha levels	TRUE	reported
5	154577444	A	G	0.1741	0.038	0.0321	4.61e-06	rs59446445	11790	GCST90274808	Interleukin-20 receptor subunit alpha levels	TRUE	reported
6	158071161	A	G	-0.0664	0.0144	0.704	4.01e-06	rs6920753	11762	GCST90274808	Interleukin-20 receptor subunit alpha levels	TRUE	reported
7	12541053	A	T	-0.4206	0.0867	0.0092	1.23e-06	rs562848049	8330	GCST90274808	Interleukin-20 receptor subunit alpha levels	TRUE	reported
7	12560554	A	T	0.3176	0.0676	0.9871	2.62e-06	rs113563938	11344	GCST90274808	Interleukin-20 receptor subunit alpha levels	TRUE	reported
7	12564176	A	G	0.3082	0.0664	0.9871	3.46e-06	rs74546953	11344	GCST90274808	Interleukin-20 receptor subunit alpha levels	TRUE	reported
8	35106738	A	G	-0.0812	0.0166	0.7894	1e-06	rs13279514	11344	GCST90274808	Interleukin-20 receptor subunit alpha levels	TRUE	reported
8	35154239	A	G	0.1171	0.0198	0.1374	3.34e-09	rs11987533	11344	GCST90274808	Interleukin-20 receptor subunit alpha levels	TRUE	reported
8	35247297	T	C	0.0788	0.0165	0.2057	1.79e-06	rs4521753	11344	GCST90274808	Interleukin-20 receptor subunit alpha levels	TRUE	reported
8	35260770	A	G	0.0802	0.0166	0.2057	1.36e-06	rs12676501	11344	GCST90274808	Interleukin-20 receptor subunit alpha levels	TRUE	reported
8	35305866	T	C	-0.0772	0.0162	0.7931	1.88e-06	rs12545139	11792	GCST90274808	Interleukin-20 receptor subunit alpha levels	TRUE	reported
8	79840734	T	G	-0.0761	0.0166	0.7494	4.55e-06	rs12056343	9894	GCST90274808	Interleukin-20 receptor subunit alpha levels	TRUE	reported
8	139987300	A	G	0.1913	0.0407	0.972	2.6e-06	rs113153423	11792	GCST90274808	Interleukin-20 receptor subunit alpha levels	TRUE	reported
8	139987976	A	G	0.1866	0.0404	0.9716	3.86e-06	rs111646912	11792	GCST90274808	Interleukin-20 receptor subunit alpha levels	TRUE	reported
12	46359689	T	G	0.5306	0.1158	0.0141	4.6e-06	rs141265124	8717	GCST90274808	Interleukin-20 receptor subunit alpha levels	TRUE	reported
12	65338914	A	AC	-0.2215	0.0483	0.0284	4.52e-06	rs139782632	8385	GCST90274808	Interleukin-20 receptor subunit alpha levels	TRUE	reported
14	97703687	G	GA	-0.2663	0.0538	0.0258	7.43e-07	rs140328131	7880	GCST90274808	Interleukin-20 receptor subunit alpha levels	TRUE	reported
16	4840791	G	GTAAA	-0.1806	0.0387	0.9542	3.06e-06	rs574580783	8381	GCST90274808	Interleukin-20 receptor subunit alpha levels	TRUE	reported
16	14288564	T	C	0.0897	0.0195	0.8313	4.22e-06	rs72785422	11343	GCST90274808	Interleukin-20 receptor subunit alpha levels	TRUE	reported
17	1508783	A	G	0.345	0.071	0.0159	1.18e-06	rs535193843	9149	GCST90274808	Interleukin-20 receptor subunit alpha levels	TRUE	reported
17	50579143	A	G	0.5091	0.1097	0.9936	3.47e-06	rs571317785	7843	GCST90274808	Interleukin-20 receptor subunit alpha levels	TRUE	reported
17	50606352	A	G	0.4982	0.1087	0.9936	4.58e-06	rs150279237	7843	GCST90274808	Interleukin-20 receptor subunit alpha levels	TRUE	reported
17	50627856	T	C	-0.5169	0.1091	0.0064	2.16e-06	rs142483548	7843	GCST90274808	Interleukin-20 receptor subunit alpha levels	TRUE	reported
17	50678048	A	C	-0.5128	0.1113	0.0063	4.08e-06	rs533729638	7843	GCST90274808	Interleukin-20 receptor subunit alpha levels	TRUE	reported
17	59389022	A	G	0.2357	0.0511	0.0208	3.98e-06	rs149111746	11783	GCST90274808	Interleukin-20 receptor subunit alpha levels	TRUE	reported
19	4626445	CT	C	0.091	0.0197	0.2595	3.85e-06	rs200414639	7943	GCST90274808	Interleukin-20 receptor subunit alpha levels	TRUE	reported
20	6087158	A	G	-0.6312	0.1364	0.0051	3.7e-06	rs189038362	6779	GCST90274808	Interleukin-20 receptor subunit alpha levels	TRUE	reported
21	15372958	G	GAA	-0.2967	0.0513	0.9492	7.31e-09	rs55715299	6879	GCST90274808	Interleukin-20 receptor subunit alpha levels	TRUE	reported
1	56566352	A	G	-0.1247	0.0252	0.0839	7.48e-07	rs6670799	11345	GCST90274796	Interleukin-10 receptor subunit alpha levels	TRUE	reported
1	56568065	A	C	0.1196	0.0253	0.9167	2.28e-06	rs75941364	11345	GCST90274796	Interleukin-10 receptor subunit alpha levels	TRUE	reported
2	142534279	T	C	0.806	0.1536	0.0054	1.54e-07	rs150878732	6780	GCST90274796	Interleukin-10 receptor subunit alpha levels	TRUE	reported
3	158539486	A	G	-0.0819	0.0179	0.8463	4.75e-06	rs1548093	11783	GCST90274796	Interleukin-10 receptor subunit alpha levels	TRUE	reported
3	158539961	A	G	0.0818	0.0179	0.1535	4.88e-06	rs6793618	11784	GCST90274796	Interleukin-10 receptor subunit alpha levels	TRUE	reported
3	158540291	T	G	0.082	0.0179	0.1526	4.63e-06	rs41272625	11784	GCST90274796	Interleukin-10 receptor subunit alpha levels	TRUE	reported
4	55383689	A	G	-0.5173	0.1129	0.0068	4.61e-06	rs146023694	8144	GCST90274796	Interleukin-10 receptor subunit alpha levels	TRUE	reported
4	69619572	A	AT	0.347	0.0693	0.9742	5.52e-07	rs556575077	6879	GCST90274796	Interleukin-10 receptor subunit alpha levels	TRUE	reported
4	95073363	T	C	-0.4025	0.0854	0.9914	2.44e-06	rs115670939	9956	GCST90274796	Interleukin-10 receptor subunit alpha levels	TRUE	reported
5	154443639	T	G	0.0623	0.0131	0.5891	1.98e-06	rs286605	11793	GCST90274796	Interleukin-10 receptor subunit alpha levels	TRUE	reported
6	43398091	A	T	0.1155	0.0247	0.1098	2.92e-06	rs9472050	8298	GCST90274796	Interleukin-10 receptor subunit alpha levels	TRUE	reported
6	44003680	A	G	-0.4016	0.0833	0.0093	1.43e-06	rs138991373	10858	GCST90274796	Interleukin-10 receptor subunit alpha levels	TRUE	reported
6	78631791	T	C	-0.4047	0.0876	0.012	3.84e-06	rs117160737	7844	GCST90274796	Interleukin-10 receptor subunit alpha levels	TRUE	reported
6	78703747	A	C	0.4057	0.0865	0.9896	2.73e-06	rs180893431	9340	GCST90274796	Interleukin-10 receptor subunit alpha levels	TRUE	reported
6	137683362	A	G	0.9603	0.2099	0.0031	4.76e-06	rs554489730	6942	GCST90274796	Interleukin-10 receptor subunit alpha levels	TRUE	reported
8	9104264	T	G	0.064	0.0135	0.4945	2.13e-06	rs10091841	11345	GCST90274796	Interleukin-10 receptor subunit alpha levels	TRUE	reported
9	6650109	CTT	C	-0.078	0.0167	0.447	3e-06	rs34149658	7943	GCST90274796	Interleukin-10 receptor subunit alpha levels	TRUE	reported
9	95463247	A	C	-0.7744	0.1665	0.9944	3.3e-06	rs180789610	6862	GCST90274796	Interleukin-10 receptor subunit alpha levels	TRUE	reported
9	134232395	A	AG	0.1272	0.0266	0.094	1.74e-06	rs563886420	8372	GCST90274796	Interleukin-10 receptor subunit alpha levels	TRUE	reported
10	18335103	T	C	0.2347	0.0511	0.9822	4.37e-06	rs80137559	11791	GCST90274796	Interleukin-10 receptor subunit alpha levels	TRUE	reported
10	89650548	T	C	0.4324	0.0917	0.0099	2.41e-06	rs144552817	8188	GCST90274796	Interleukin-10 receptor subunit alpha levels	TRUE	reported
11	88806655	T	C	-0.4612	0.1004	0.0094	4.36e-06	rs117488123	7816	GCST90274796	Interleukin-10 receptor subunit alpha levels	TRUE	reported
11	117864063	A	G	-0.0844	0.0168	0.8171	5.07e-07	rs3135932	11793	GCST90274796	Interleukin-10 receptor subunit alpha levels	TRUE	reported
11	128028366	A	G	1.1493	0.2475	0.9978	3.42e-06	rs150119677	6304	GCST90274796	Interleukin-10 receptor subunit alpha levels	TRUE	reported
12	5368481	A	G	-0.6774	0.1481	0.0089	4.79e-06	rs187274285	6834	GCST90274796	Interleukin-10 receptor subunit alpha levels	TRUE	reported
13	94218045	T	C	-0.6271	0.1263	0.0148	6.86e-07	rs143560862	7736	GCST90274796	Interleukin-10 receptor subunit alpha levels	TRUE	reported
14	54936587	C	G	-0.15	0.0323	0.9551	3.42e-06	rs17253473	11788	GCST90274796	Interleukin-10 receptor subunit alpha levels	TRUE	reported
14	54936596	A	T	-0.1598	0.0329	0.9568	1.19e-06	rs79124831	11788	GCST90274796	Interleukin-10 receptor subunit alpha levels	TRUE	reported
14	55005535	A	G	0.1676	0.0343	0.0481	1.03e-06	rs17832137	10289	GCST90274796	Interleukin-10 receptor subunit alpha levels	TRUE	reported
14	66407415	A	T	-0.3832	0.0825	0.0145	3.4e-06	rs77577215	10858	GCST90274796	Interleukin-10 receptor subunit alpha levels	TRUE	reported
14	66407688	A	G	0.3915	0.0823	0.9853	1.97e-06	rs74719858	10858	GCST90274796	Interleukin-10 receptor subunit alpha levels	TRUE	reported
14	66418955	A	G	-0.4168	0.0841	0.0141	7.2e-07	rs77977719	9956	GCST90274796	Interleukin-10 receptor subunit alpha levels	TRUE	reported
14	66421123	A	G	-0.4098	0.0849	0.0142	1.39e-06	rs74582635	9956	GCST90274796	Interleukin-10 receptor subunit alpha levels	TRUE	reported
15	93461371	C	G	0.0623	0.0131	0.4267	1.98e-06	rs1406714	11783	GCST90274796	Interleukin-10 receptor subunit alpha levels	TRUE	reported
16	5247086	T	C	-0.3868	0.0841	0.0107	4.24e-06	rs143313574	9956	GCST90274796	Interleukin-10 receptor subunit alpha levels	TRUE	reported
18	19609711	T	C	0.874	0.1882	0.9971	3.42e-06	rs139158356	6442	GCST90274796	Interleukin-10 receptor subunit alpha levels	TRUE	reported
22	47785417	T	C	-0.7009	0.1494	0.0045	2.71e-06	rs140625515	6780	GCST90274796	Interleukin-10 receptor subunit alpha levels	TRUE	reported
1	43211309	T	TACAC	0.2578	0.0522	0.9664	7.86e-07	rs544482185	7456	GCST90274812	Interleukin-33 levels	TRUE	reported
1	43755788	T	C	-0.5795	0.1258	0.0066	4.09e-06	rs563747611	7654	GCST90274812	Interleukin-33 levels	TRUE	reported
2	168518584	T	TA	-0.0863	0.0187	0.2972	3.93e-06	rs34648588	7943	GCST90274812	Interleukin-33 levels	TRUE	reported
2	168519445	CT	C	0.0895	0.0195	0.7531	4.44e-06	rs34076551	7943	GCST90274812	Interleukin-33 levels	TRUE	reported
3	69700787	T	G	0.5131	0.1002	0.0171	3.04e-07	rs1559941	8867	GCST90274812	Interleukin-33 levels	TRUE	reported
4	127333751	A	C	-0.7969	0.1726	0.9969	3.89e-06	rs146018910	7096	GCST90274812	Interleukin-33 levels	TRUE	reported
4	189492967	T	G	0.1741	0.0364	0.047	1.73e-06	rs35370544	8385	GCST90274812	Interleukin-33 levels	TRUE	reported
6	38719850	C	G	0.0691	0.0148	0.6997	3.03e-06	rs7742625	11345	GCST90274812	Interleukin-33 levels	TRUE	reported
6	38761177	T	TATTG	0.0741	0.0156	0.6331	2.03e-06	rs112652273	8390	GCST90274812	Interleukin-33 levels	TRUE	reported
6	156872261	T	C	-0.1166	0.0255	0.1064	4.82e-06	rs77792454	8817	GCST90274812	Interleukin-33 levels	TRUE	reported
7	24423445	C	G	0.1833	0.04	0.0307	4.59e-06	rs17149396	11789	GCST90274812	Interleukin-33 levels	TRUE	reported
7	129682878	A	G	0.3313	0.0713	0.0121	3.38e-06	rs184248213	10214	GCST90274812	Interleukin-33 levels	TRUE	reported
8	14228908	C	G	0.4525	0.0917	0.9894	8.03e-07	rs142710258	7844	GCST90274812	Interleukin-33 levels	TRUE	reported
8	31186833	T	G	0.9712	0.2083	0.9978	3.12e-06	rs528915396	6752	GCST90274812	Interleukin-33 levels	TRUE	reported
8	53377423	T	C	-0.9083	0.1909	0.9967	1.96e-06	rs577797204	6942	GCST90274812	Interleukin-33 levels	TRUE	reported
8	53514743	T	C	-0.8783	0.1909	0.9965	4.21e-06	rs574125394	7844	GCST90274812	Interleukin-33 levels	TRUE	reported
8	87995921	A	G	-0.0752	0.0162	0.2321	3.45e-06	rs66755903	11345	GCST90274812	Interleukin-33 levels	TRUE	reported
8	99253353	T	C	-1.2451	0.2703	0.9988	4.1e-06	rs147184497	6862	GCST90274812	Interleukin-33 levels	TRUE	reported
9	21663051	C	G	0.1308	0.0277	0.9172	2.34e-06	rs62556318	11345	GCST90274812	Interleukin-33 levels	TRUE	reported
9	114479734	A	T	0.7141	0.1443	0.9941	7.47e-07	rs186643128	6834	GCST90274812	Interleukin-33 levels	TRUE	reported
9	114635800	T	C	0.6877	0.137	0.9942	5.18e-07	rs535721519	7736	GCST90274812	Interleukin-33 levels	TRUE	reported
12	96439814	A	G	0.1259	0.0273	0.9273	3.99e-06	rs78455659	11345	GCST90274812	Interleukin-33 levels	TRUE	reported
15	66969470	C	G	0.0668	0.0135	0.4502	7.49e-07	rs62005602	11338	GCST90274812	Interleukin-33 levels	TRUE	reported
15	66970271	T	C	-0.0681	0.0135	0.5496	4.55e-07	rs8042883	11345	GCST90274812	Interleukin-33 levels	TRUE	reported
16	12345232	T	C	-0.576	0.1216	0.9944	2.17e-06	rs138430438	7844	GCST90274812	Interleukin-33 levels	TRUE	reported
16	68724239	A	G	0.7917	0.1721	0.0039	4.22e-06	rs192985217	5540	GCST90274812	Interleukin-33 levels	TRUE	reported
16	79491576	A	C	0.0936	0.0203	0.8755	4.01e-06	rs13336496	11780	GCST90274812	Interleukin-33 levels	TRUE	reported
18	67652845	A	G	0.5566	0.1202	0.007	3.65e-06	rs192969524	7424	GCST90274812	Interleukin-33 levels	TRUE	reported
18	73359115	A	G	0.3432	0.0748	0.0112	4.47e-06	rs112495884	10858	GCST90274812	Interleukin-33 levels	TRUE	reported
19	14299739	A	C	-0.1184	0.0233	0.1177	3.74e-07	rs10415966	10281	GCST90274812	Interleukin-33 levels	TRUE	reported
19	14299750	T	C	-0.1191	0.024	0.1116	6.96e-07	rs10415972	10281	GCST90274812	Interleukin-33 levels	TRUE	reported
19	14299815	C	G	0.1203	0.024	0.8888	5.37e-07	rs10416162	10281	GCST90274812	Interleukin-33 levels	TRUE	reported
19	14300150	A	G	0.111	0.0238	0.8875	3.1e-06	rs13346466	10281	GCST90274812	Interleukin-33 levels	TRUE	reported
19	14304244	T	C	-0.1187	0.0234	0.1169	3.92e-07	rs56044494	10281	GCST90274812	Interleukin-33 levels	TRUE	reported
19	14308270	T	C	-0.1151	0.0231	0.1189	6.27e-07	rs62122141	10281	GCST90274812	Interleukin-33 levels	TRUE	reported
21	40484010	T	C	-0.0732	0.0158	0.2201	3.61e-06	rs1013434	11783	GCST90274812	Interleukin-33 levels	TRUE	reported
22	31937927	A	T	0.319	0.0667	0.9832	1.73e-06	rs187115796	10214	GCST90274812	Interleukin-33 levels	TRUE	reported
1	59542840	A	G	-0.3974	0.083	0.9902	1.68e-06	rs192090594	11045	GCST90274809	Interleukin-22 receptor subunit alpha-1 levels	TRUE	reported
1	59552127	A	G	0.3628	0.0748	0.0118	1.23e-06	rs41287688	11045	GCST90274809	Interleukin-22 receptor subunit alpha-1 levels	TRUE	reported
1	152231887	T	C	0.9771	0.2099	0.003	3.24e-06	rs193127907	6942	GCST90274809	Interleukin-22 receptor subunit alpha-1 levels	TRUE	reported
1	237517683	A	T	0.989	0.2041	0.0029	1.26e-06	rs182614543	6862	GCST90274809	Interleukin-22 receptor subunit alpha-1 levels	TRUE	reported
2	85320044	T	C	-0.1271	0.0273	0.0671	3.23e-06	rs78594373	11767	GCST90274809	Interleukin-22 receptor subunit alpha-1 levels	TRUE	reported
2	189897720	T	C	-0.5851	0.1279	0.0049	4.77e-06	rs114123906	8188	GCST90274809	Interleukin-22 receptor subunit alpha-1 levels	TRUE	reported
2	189950307	T	C	0.5874	0.1252	0.9951	2.71e-06	rs115859702	8488	GCST90274809	Interleukin-22 receptor subunit alpha-1 levels	TRUE	reported
2	190089006	C	G	-0.5316	0.1124	0.0064	2.25e-06	rs115719229	7506	GCST90274809	Interleukin-22 receptor subunit alpha-1 levels	TRUE	reported
2	190105732	A	G	-0.526	0.1107	0.0066	2.02e-06	rs55882102	7506	GCST90274809	Interleukin-22 receptor subunit alpha-1 levels	TRUE	reported
4	26143082	A	C	0.2679	0.0561	0.0253	1.79e-06	rs1473089	10916	GCST90274809	Interleukin-22 receptor subunit alpha-1 levels	TRUE	reported
4	26147381	T	G	0.262	0.0559	0.0249	2.77e-06	rs59542930	10918	GCST90274809	Interleukin-22 receptor subunit alpha-1 levels	TRUE	reported
4	157031745	A	G	0.1722	0.037	0.0376	3.25e-06	rs75590335	11345	GCST90274809	Interleukin-22 receptor subunit alpha-1 levels	TRUE	reported
7	37527373	A	G	-0.9906	0.2073	0.0075	1.77e-06	rs144034072	6414	GCST90274809	Interleukin-22 receptor subunit alpha-1 levels	TRUE	reported
7	81065718	A	G	0.2157	0.0446	0.0277	1.32e-06	rs147299679	11776	GCST90274809	Interleukin-22 receptor subunit alpha-1 levels	TRUE	reported
7	81154741	A	T	-0.2102	0.0412	0.9695	3.36e-07	rs79229049	11781	GCST90274809	Interleukin-22 receptor subunit alpha-1 levels	TRUE	reported
8	27332066	A	ATATG	-0.0816	0.0176	0.6894	3.55e-06	rs33930869	7943	GCST90274809	Interleukin-22 receptor subunit alpha-1 levels	TRUE	reported
8	81502336	A	G	0.2815	0.0571	0.0165	8.23e-07	rs56282088	10919	GCST90274809	Interleukin-22 receptor subunit alpha-1 levels	TRUE	reported
8	87485765	T	C	0.2714	0.0584	0.0167	3.36e-06	rs13257574	11306	GCST90274809	Interleukin-22 receptor subunit alpha-1 levels	TRUE	reported
9	100911150	A	G	-1.0315	0.201	0.9975	2.87e-07	rs148404159	6862	GCST90274809	Interleukin-22 receptor subunit alpha-1 levels	TRUE	reported
9	117625236	A	G	0.2591	0.0559	0.0164	3.57e-06	rs113078281	11793	GCST90274809	Interleukin-22 receptor subunit alpha-1 levels	TRUE	reported
9	117667449	T	C	0.27	0.0582	0.0163	3.5e-06	rs3181361	11345	GCST90274809	Interleukin-22 receptor subunit alpha-1 levels	TRUE	reported
10	44669337	A	G	0.2203	0.047	0.9713	2.77e-06	rs12240324	11793	GCST90274809	Interleukin-22 receptor subunit alpha-1 levels	TRUE	reported
10	44670500	T	C	-0.2177	0.0472	0.0285	3.98e-06	rs12264354	11793	GCST90274809	Interleukin-22 receptor subunit alpha-1 levels	TRUE	reported
10	62559465	T	C	0.8198	0.161	0.0046	3.54e-07	rs376294185	6780	GCST90274809	Interleukin-22 receptor subunit alpha-1 levels	TRUE	reported
10	71011969	T	TA	0.0784	0.017	0.6334	3.99e-06	rs148579602	7943	GCST90274809	Interleukin-22 receptor subunit alpha-1 levels	TRUE	reported
11	133776443	A	G	0.6479	0.1356	0.007	1.77e-06	rs146662739	6942	GCST90274809	Interleukin-22 receptor subunit alpha-1 levels	TRUE	reported
14	62394907	T	C	-0.0751	0.0162	0.7694	3.56e-06	rs17256492	11345	GCST90274809	Interleukin-22 receptor subunit alpha-1 levels	TRUE	reported
14	94195177	A	G	-0.0651	0.0139	0.6072	2.82e-06	rs8008754	11345	GCST90274809	Interleukin-22 receptor subunit alpha-1 levels	TRUE	reported
14	94197473	A	G	-0.0674	0.0138	0.6092	1.04e-06	rs7158900	11344	GCST90274809	Interleukin-22 receptor subunit alpha-1 levels	TRUE	reported
15	31504926	C	G	-0.7269	0.1428	0.004	3.57e-07	rs141376467	7844	GCST90274809	Interleukin-22 receptor subunit alpha-1 levels	TRUE	reported
20	49998577	A	T	-0.0617	0.0133	0.4499	3.5e-06	rs1006819	11781	GCST90274809	Interleukin-22 receptor subunit alpha-1 levels	TRUE	reported
20	49999637	T	C	0.0617	0.0133	0.5409	3.5e-06	rs6021169	11783	GCST90274809	Interleukin-22 receptor subunit alpha-1 levels	TRUE	reported
20	49999884	T	C	0.0619	0.0133	0.548	3.25e-06	rs6021170	11793	GCST90274809	Interleukin-22 receptor subunit alpha-1 levels	TRUE	reported
20	50000245	T	C	0.0612	0.0134	0.5478	4.94e-06	rs6096402	11779	GCST90274809	Interleukin-22 receptor subunit alpha-1 levels	TRUE	reported
20	50000568	C	G	-0.0621	0.0134	0.4515	3.58e-06	rs1006821	11782	GCST90274809	Interleukin-22 receptor subunit alpha-1 levels	TRUE	reported
20	50000969	A	T	0.0629	0.0134	0.5484	2.68e-06	rs6067754	11782	GCST90274809	Interleukin-22 receptor subunit alpha-1 levels	TRUE	reported
20	50001752	T	C	0.0632	0.0134	0.5504	2.4e-06	rs4811167	11793	GCST90274809	Interleukin-22 receptor subunit alpha-1 levels	TRUE	reported
20	50003275	T	C	0.0624	0.0134	0.5442	3.21e-06	rs4811168	11779	GCST90274809	Interleukin-22 receptor subunit alpha-1 levels	TRUE	reported
20	50003316	A	G	0.063	0.0134	0.5512	2.58e-06	rs4811169	11780	GCST90274809	Interleukin-22 receptor subunit alpha-1 levels	TRUE	reported
21	42295154	A	G	0.3467	0.0752	0.0109	4.02e-06	rs117263973	10858	GCST90274809	Interleukin-22 receptor subunit alpha-1 levels	TRUE	reported
1	109204032	A	G	-0.9584	0.2098	0.0162	4.92e-06	rs116940031	5540	GCST90274828	Neurturin levels	TRUE	reported
1	214886642	A	G	-0.0652	0.0141	0.3445	3.76e-06	rs4360502	11342	GCST90274828	Neurturin levels	TRUE	reported
1	214923603	T	C	-0.0661	0.0143	0.2778	3.79e-06	rs2016976	11784	GCST90274828	Neurturin levels	TRUE	reported
1	214929118	A	G	-0.0656	0.0143	0.2792	4.49e-06	rs4655368	11784	GCST90274828	Neurturin levels	TRUE	reported
2	15734798	A	G	0.0786	0.0172	0.8077	4.88e-06	rs62120726	11343	GCST90274828	Neurturin levels	TRUE	reported
2	159516350	T	TG	-0.3383	0.0689	0.0172	9.11e-07	rs546403662	6408	GCST90274828	Neurturin levels	TRUE	reported
2	172434373	C	G	-0.0622	0.0136	0.3324	4.8e-06	rs908372	11773	GCST90274828	Neurturin levels	TRUE	reported
3	73067086	T	C	0.3387	0.0738	0.0176	4.44e-06	rs76777800	6941	GCST90274828	Neurturin levels	TRUE	reported
4	43313220	T	C	-0.4361	0.0867	0.0118	4.91e-07	rs143131035	7585	GCST90274828	Neurturin levels	TRUE	reported
5	21436451	A	T	-0.0653	0.0142	0.6299	4.25e-06	rs62347185	11342	GCST90274828	Neurturin levels	TRUE	reported
5	21443745	T	C	0.065	0.0142	0.3696	4.71e-06	rs62347186	11343	GCST90274828	Neurturin levels	TRUE	reported
5	21508959	C	G	-0.0879	0.0176	0.6738	5.9e-07	rs7712604	8587	GCST90274828	Neurturin levels	TRUE	reported
5	21510503	A	C	0.0668	0.0146	0.3616	4.75e-06	rs9765069	11343	GCST90274828	Neurturin levels	TRUE	reported
5	21515604	CCACACA	C	0.0785	0.0168	0.4173	2.97e-06	rs139030242	7943	GCST90274828	Neurturin levels	TRUE	reported
5	171026543	C	G	0.0668	0.0146	0.6695	4.75e-06	rs171784	11342	GCST90274828	Neurturin levels	TRUE	reported
5	171026588	T	C	-0.074	0.0159	0.2493	3.25e-06	rs29630	11343	GCST90274828	Neurturin levels	TRUE	reported
6	71913812	C	G	1.0476	0.2104	0.0024	6.39e-07	rs192214514	6861	GCST90274828	Neurturin levels	TRUE	reported
6	78800523	A	G	-0.5843	0.128	0.005	5e-06	rs111953706	6861	GCST90274828	Neurturin levels	TRUE	reported
7	133071078	C	G	-0.4444	0.0962	0.9906	3.85e-06	rs184587898	9955	GCST90274828	Neurturin levels	TRUE	reported
8	14194166	T	C	0.9057	0.1934	0.0026	2.83e-06	rs527975462	6941	GCST90274828	Neurturin levels	TRUE	reported
8	43185781	T	G	0.3743	0.0786	0.0252	1.92e-06	rs192427410	8783	GCST90274828	Neurturin levels	TRUE	reported
8	43342300	T	C	0.377	0.0794	0.0256	2.05e-06	rs118109977	8783	GCST90274828	Neurturin levels	TRUE	reported
8	110631888	A	G	-0.492	0.1043	0.9826	2.39e-06	rs139391401	6971	GCST90274828	Neurturin levels	TRUE	reported
11	4475910	T	C	0.1667	0.034	0.958	9.44e-07	rs77216559	11791	GCST90274828	Neurturin levels	TRUE	reported
11	10358788	A	G	0.1565	0.031	0.0646	4.46e-07	rs182274799	9461	GCST90274828	Neurturin levels	TRUE	reported
11	10367093	A	G	-0.1453	0.0308	0.9347	2.39e-06	rs60743731	9461	GCST90274828	Neurturin levels	TRUE	reported
11	95201232	A	G	0.087	0.0178	0.5434	1.02e-06	rs4753678	7942	GCST90274828	Neurturin levels	TRUE	reported
14	64661011	T	TTTC	-0.0786	0.0171	0.6	4.3e-06	rs35808217	7942	GCST90274828	Neurturin levels	TRUE	reported
15	24046105	T	C	0.1332	0.0286	0.9133	3.2e-06	rs8033310	11343	GCST90274828	Neurturin levels	TRUE	reported
16	21786236	T	C	-0.1778	0.037	0.9507	1.54e-06	rs28759830	9461	GCST90274828	Neurturin levels	TRUE	reported
16	25004804	A	G	0.2217	0.048	0.022	3.86e-06	rs148164126	11774	GCST90274828	Neurturin levels	TRUE	reported
16	26080883	A	T	0.0746	0.0157	0.6725	2.02e-06	rs7202385	9460	GCST90274828	Neurturin levels	TRUE	reported
16	61096071	A	G	0.527	0.1152	0.9901	4.77e-06	rs9932455	7348	GCST90274828	Neurturin levels	TRUE	reported
17	28260302	T	C	0.7739	0.1505	0.0046	2.72e-07	rs527252348	6778	GCST90274828	Neurturin levels	TRUE	reported
19	4528078	T	C	0.3379	0.0674	0.0184	5.35e-07	rs369103600	7705	GCST90274828	Neurturin levels	TRUE	reported
19	14688146	T	C	0.1689	0.037	0.9638	5e-06	rs8108156	11781	GCST90274828	Neurturin levels	TRUE	reported
19	14690475	A	T	-0.1699	0.0371	0.0351	4.66e-06	rs115918556	11790	GCST90274828	Neurturin levels	TRUE	reported
19	14690961	A	T	0.1727	0.037	0.9648	3.05e-06	rs117820221	11790	GCST90274828	Neurturin levels	TRUE	reported
19	14691220	A	G	-0.1699	0.0369	0.0364	4.14e-06	rs111891691	11790	GCST90274828	Neurturin levels	TRUE	reported
19	14691684	A	C	-0.1731	0.0366	0.0363	2.25e-06	rs10412462	11790	GCST90274828	Neurturin levels	TRUE	reported
19	14713522	T	C	0.1705	0.0366	0.9647	3.19e-06	rs115743790	11791	GCST90274828	Neurturin levels	TRUE	reported
19	41938049	A	G	0.6971	0.1495	0.0042	3.12e-06	rs149255815	7842	GCST90274828	Neurturin levels	TRUE	reported
19	46887572	C	G	0.8157	0.1764	0.0059	3.76e-06	rs185698592	6941	GCST90274828	Neurturin levels	TRUE	reported
20	55469957	A	G	-0.2288	0.0495	0.0208	3.8e-06	rs113580784	11768	GCST90274828	Neurturin levels	TRUE	reported
1	204844974	A	G	-0.8247	0.1806	0.003	4.96e-06	rs552885053	7844	GCST90274794	Interferon gamma levels	TRUE	reported
2	19225861	T	G	0.145	0.0309	0.9482	2.7e-06	rs67459979	11793	GCST90274794	Interferon gamma levels	TRUE	reported
2	19234534	T	G	0.1461	0.0307	0.9482	1.95e-06	rs67101138	11793	GCST90274794	Interferon gamma levels	TRUE	reported
2	19238978	A	G	-0.1411	0.0308	0.0519	4.62e-06	rs72780774	11792	GCST90274794	Interferon gamma levels	TRUE	reported
2	19242481	T	C	-0.1416	0.0309	0.0514	4.59e-06	rs72780779	11793	GCST90274794	Interferon gamma levels	TRUE	reported
2	75197502	T	G	-0.6406	0.1378	0.005	3.34e-06	rs535871218	6834	GCST90274794	Interferon gamma levels	TRUE	reported
2	172185503	A	AT	0.2075	0.0444	0.9704	2.96e-06	rs113422093	8389	GCST90274794	Interferon gamma levels	TRUE	reported
3	2921515	A	C	0.0648	0.014	0.4253	3.68e-06	rs6442763	11345	GCST90274794	Interferon gamma levels	TRUE	reported
3	195847423	T	C	-0.5373	0.1164	0.0078	3.91e-06	rs114882984	6780	GCST90274794	Interferon gamma levels	TRUE	reported
5	16780575	A	T	0.6866	0.1503	0.0046	4.92e-06	rs187267833	8160	GCST90274794	Interferon gamma levels	TRUE	reported
6	12057063	G	GT	-0.3008	0.0651	0.9856	3.83e-06	rs199501899	8377	GCST90274794	Interferon gamma levels	TRUE	reported
6	67667760	A	G	-0.4995	0.1085	0.0207	4.15e-06	rs187201208	7844	GCST90274794	Interferon gamma levels	TRUE	reported
7	103313249	A	G	-0.435	0.0947	0.0094	4.36e-06	rs141930231	8144	GCST90274794	Interferon gamma levels	TRUE	reported
7	103360885	A	G	0.4706	0.1013	0.9916	3.39e-06	rs117330609	7844	GCST90274794	Interferon gamma levels	TRUE	reported
8	42482125	T	C	-0.5304	0.1147	0.0092	3.76e-06	rs182256634	8116	GCST90274794	Interferon gamma levels	TRUE	reported
10	117441941	C	G	1.1083	0.2335	0.0016	2.07e-06	rs78615428	6862	GCST90274794	Interferon gamma levels	TRUE	reported
10	130545142	A	G	0.136	0.0283	0.9427	1.54e-06	rs61863416	11774	GCST90274794	Interferon gamma levels	TRUE	reported
10	133933803	T	G	0.6207	0.1345	0.9956	3.93e-06	rs557500922	6672	GCST90274794	Interferon gamma levels	TRUE	reported
11	44058168	CA	C	0.2584	0.0559	0.0197	3.79e-06	rs199768954	8388	GCST90274794	Interferon gamma levels	TRUE	reported
11	110972327	T	C	0.4666	0.0897	0.0122	1.97e-07	rs140562194	7396	GCST90274794	Interferon gamma levels	TRUE	reported
12	70814510	A	T	-0.8961	0.1815	0.0025	7.93e-07	rs141499724	7736	GCST90274794	Interferon gamma levels	TRUE	reported
13	27470248	T	C	0.3251	0.0709	0.9882	4.53e-06	rs76159806	10558	GCST90274794	Interferon gamma levels	TRUE	reported
13	27473585	T	C	0.3485	0.0708	0.9882	8.55e-07	rs74903999	10558	GCST90274794	Interferon gamma levels	TRUE	reported
13	31083565	A	G	0.5977	0.1287	0.0069	3.42e-06	rs117511086	6942	GCST90274794	Interferon gamma levels	TRUE	reported
13	90334795	C	G	0.1935	0.0384	0.9683	4.68e-07	rs146527076	11781	GCST90274794	Interferon gamma levels	TRUE	reported
16	33979312	T	G	0.2684	0.0573	0.0324	2.81e-06	rs531747046	6257	GCST90274794	Interferon gamma levels	TRUE	reported
16	60592247	A	G	0.7052	0.1432	0.0041	8.45e-07	rs542857265	7844	GCST90274794	Interferon gamma levels	TRUE	reported
17	26670627	A	G	-0.061	0.0133	0.5068	4.51e-06	rs3093692	11345	GCST90274794	Interferon gamma levels	TRUE	reported
17	26671196	C	G	0.0618	0.0133	0.4935	3.37e-06	rs733914	11345	GCST90274794	Interferon gamma levels	TRUE	reported
17	26676135	T	C	-0.0612	0.0133	0.5048	4.19e-06	rs13469	11345	GCST90274794	Interferon gamma levels	TRUE	reported
17	26678960	C	G	-0.062	0.0133	0.5056	3.14e-06	rs2073867	11345	GCST90274794	Interferon gamma levels	TRUE	reported
17	26679563	CTTT	C	-0.0794	0.0163	0.4698	1.11e-06	rs3032928	7943	GCST90274794	Interferon gamma levels	TRUE	reported
17	26688663	A	G	-0.0631	0.0133	0.506	2.09e-06	rs708100	11345	GCST90274794	Interferon gamma levels	TRUE	reported
17	26694861	A	G	-0.0635	0.0127	0.4705	5.73e-07	rs704	11793	GCST90274794	Interferon gamma levels	TRUE	reported
17	26703682	A	T	-0.0627	0.0133	0.5051	2.43e-06	rs7212510	11345	GCST90274794	Interferon gamma levels	TRUE	reported
17	26706946	T	G	-0.0653	0.0134	0.5075	1.1e-06	rs2027993	11345	GCST90274794	Interferon gamma levels	TRUE	reported
17	26716821	T	C	-0.0613	0.0133	0.5038	4.05e-06	rs4795433	11345	GCST90274794	Interferon gamma levels	TRUE	reported
17	26716917	T	G	-0.0623	0.0133	0.5038	2.81e-06	rs4795434	11345	GCST90274794	Interferon gamma levels	TRUE	reported
17	26717268	A	G	-0.0613	0.0133	0.5039	4.05e-06	rs4794828	11345	GCST90274794	Interferon gamma levels	TRUE	reported
17	26718177	A	T	-0.0622	0.0133	0.5042	2.92e-06	rs6505079	11345	GCST90274794	Interferon gamma levels	TRUE	reported
17	26718592	T	C	-0.0617	0.0133	0.5041	3.5e-06	rs9913833	11345	GCST90274794	Interferon gamma levels	TRUE	reported
17	73190431	T	G	1.5081	0.3265	0.9987	3.86e-06	rs571386970	6780	GCST90274794	Interferon gamma levels	TRUE	reported
20	46408844	T	C	0.0671	0.0137	0.5585	9.69e-07	rs4810686	11344	GCST90274794	Interferon gamma levels	TRUE	reported
20	46408929	T	G	0.0652	0.0137	0.5596	1.94e-06	rs4810687	11345	GCST90274794	Interferon gamma levels	TRUE	reported
20	46409090	A	G	0.0636	0.0137	0.5563	3.44e-06	rs4810688	11345	GCST90274794	Interferon gamma levels	TRUE	reported
20	46410965	A	C	-0.0632	0.0138	0.4081	4.66e-06	rs6018686	11344	GCST90274794	Interferon gamma levels	TRUE	reported
21	37335521	A	G	0.2184	0.0403	0.0412	5.98e-08	rs62230781	11345	GCST90274794	Interferon gamma levels	TRUE	reported
1	7559326	T	TAG	-0.2867	0.0616	0.026	3.25e-06	rs540915531	7943	GCST90274806	Interleukin-2 levels	TRUE	reported
2	192535679	A	C	0.1894	0.0407	0.9728	3.26e-06	rs116375539	11786	GCST90274806	Interleukin-2 levels	TRUE	reported
2	192579244	A	G	0.1843	0.0402	0.9707	4.55e-06	rs116581453	11789	GCST90274806	Interleukin-2 levels	TRUE	reported
2	192579384	A	G	0.2016	0.0424	0.9733	1.99e-06	rs79419497	11789	GCST90274806	Interleukin-2 levels	TRUE	reported
3	12360546	A	G	-0.1973	0.0416	0.9705	2.11e-06	rs111698017	11789	GCST90274806	Interleukin-2 levels	TRUE	reported
3	12396234	T	C	0.2095	0.0419	0.0287	5.73e-07	rs142641125	11789	GCST90274806	Interleukin-2 levels	TRUE	reported
3	64864128	A	G	-0.1011	0.0216	0.8952	2.86e-06	rs76640579	11788	GCST90274806	Interleukin-2 levels	TRUE	reported
3	64865085	T	G	-0.0992	0.0217	0.8961	4.84e-06	rs28627902	11788	GCST90274806	Interleukin-2 levels	TRUE	reported
3	64865615	T	C	-0.1048	0.0217	0.8961	1.37e-06	rs77853517	11787	GCST90274806	Interleukin-2 levels	TRUE	reported
3	125990583	A	T	0.0806	0.0173	0.8282	3.18e-06	rs6794035	11768	GCST90274806	Interleukin-2 levels	TRUE	reported
3	125990756	A	G	0.0867	0.018	0.826	1.46e-06	rs7638664	11341	GCST90274806	Interleukin-2 levels	TRUE	reported
3	125991040	A	T	0.0854	0.0174	0.8293	9.2e-07	rs7638939	11769	GCST90274806	Interleukin-2 levels	TRUE	reported
3	137247468	T	C	0.1737	0.038	0.039	4.85e-06	rs75739108	11341	GCST90274806	Interleukin-2 levels	TRUE	reported
4	34713434	T	G	0.1176	0.0255	0.9036	3.99e-06	rs79925007	11341	GCST90274806	Interleukin-2 levels	TRUE	reported
4	138235156	T	G	-0.0646	0.0139	0.6861	3.36e-06	rs6535212	11784	GCST90274806	Interleukin-2 levels	TRUE	reported
4	147485512	T	C	0.3212	0.0696	0.0108	3.93e-06	rs150301768	11789	GCST90274806	Interleukin-2 levels	TRUE	reported
5	35188802	T	C	-0.1216	0.026	0.9334	2.91e-06	rs4703508	11789	GCST90274806	Interleukin-2 levels	TRUE	reported
6	22052417	T	G	-1.1876	0.2585	0.0027	4.34e-06	rs549344892	6810	GCST90274806	Interleukin-2 levels	TRUE	reported
7	107963926	T	C	0.5377	0.1165	0.9917	3.92e-06	rs62469211	6859	GCST90274806	Interleukin-2 levels	TRUE	reported
9	88772229	A	T	0.1357	0.0295	0.0611	4.22e-06	rs7465841	9909	GCST90274806	Interleukin-2 levels	TRUE	reported
9	88772772	A	G	0.1364	0.0298	0.0603	4.71e-06	rs11496772	9909	GCST90274806	Interleukin-2 levels	TRUE	reported
9	88773794	T	C	0.142	0.0304	0.0616	3e-06	rs61081981	9264	GCST90274806	Interleukin-2 levels	TRUE	reported
9	88775115	A	C	-0.1468	0.0309	0.9396	2.03e-06	rs201229721	9257	GCST90274806	Interleukin-2 levels	TRUE	reported
9	88776495	A	T	0.1418	0.0304	0.0618	3.09e-06	rs10868384	9265	GCST90274806	Interleukin-2 levels	TRUE	reported
9	88777064	T	C	0.1434	0.0306	0.0611	2.78e-06	rs11141276	9265	GCST90274806	Interleukin-2 levels	TRUE	reported
9	88777412	T	TG	0.1458	0.0314	0.0628	3.43e-06	rs199983300	8391	GCST90274806	Interleukin-2 levels	TRUE	reported
9	88777609	A	C	0.1363	0.0298	0.0602	4.79e-06	rs74990822	9909	GCST90274806	Interleukin-2 levels	TRUE	reported
9	88778052	T	TG	0.1446	0.0314	0.0625	4.12e-06	rs5898920	8391	GCST90274806	Interleukin-2 levels	TRUE	reported
9	136482385	T	C	-0.7391	0.1574	0.004	2.66e-06	rs144717026	7840	GCST90274806	Interleukin-2 levels	TRUE	reported
10	2293803	T	G	-0.1999	0.0431	0.0244	3.52e-06	rs74852566	11789	GCST90274806	Interleukin-2 levels	TRUE	reported
10	62169425	T	C	-0.6956	0.1445	0.0041	1.48e-06	rs117822532	7839	GCST90274806	Interleukin-2 levels	TRUE	reported
10	67202938	T	C	-0.1222	0.0259	0.9188	2.38e-06	rs10996419	11784	GCST90274806	Interleukin-2 levels	TRUE	reported
13	25695119	C	G	-0.6063	0.1189	0.9928	3.41e-07	rs527949048	7456	GCST90274806	Interleukin-2 levels	TRUE	reported
13	85868678	A	G	0.1922	0.0414	0.0318	3.44e-06	rs77832761	11785	GCST90274806	Interleukin-2 levels	TRUE	reported
13	95200973	CA	C	-0.2759	0.0539	0.0229	3.08e-07	rs145516501	8383	GCST90274806	Interleukin-2 levels	TRUE	reported
14	55563894	C	G	-0.2699	0.0576	0.9727	2.79e-06	rs144129701	11341	GCST90274806	Interleukin-2 levels	TRUE	reported
16	77424853	A	G	-0.0723	0.0154	0.738	2.67e-06	rs4887904	11341	GCST90274806	Interleukin-2 levels	TRUE	reported
16	77431739	T	C	-0.0728	0.0153	0.7384	1.95e-06	rs36006983	11341	GCST90274806	Interleukin-2 levels	TRUE	reported
16	77431808	A	G	0.0719	0.0153	0.2599	2.61e-06	rs34010273	11341	GCST90274806	Interleukin-2 levels	TRUE	reported
17	103299	A	C	-0.0723	0.0149	0.6969	1.22e-06	rs28515912	10723	GCST90274806	Interleukin-2 levels	TRUE	reported
17	49877851	A	G	0.5727	0.1225	0.0076	2.94e-06	rs550343970	6859	GCST90274806	Interleukin-2 levels	TRUE	reported
17	73558213	G	GT	-0.081	0.0177	0.7096	4.73e-06	rs35252272	7307	GCST90274806	Interleukin-2 levels	TRUE	reported
19	55502846	C	G	-0.0849	0.017	0.2053	5.91e-07	rs1671226	11341	GCST90274806	Interleukin-2 levels	TRUE	reported
19	55503906	T	TGGGG	0.1003	0.0197	0.774	3.55e-07	rs111484503	7943	GCST90274806	Interleukin-2 levels	TRUE	reported
19	55506516	T	TA	-0.1007	0.0197	0.222	3.19e-07	rs35266089	7943	GCST90274806	Interleukin-2 levels	TRUE	reported
19	55507735	A	G	-0.0823	0.0167	0.2162	8.3e-07	rs1654505	11341	GCST90274806	Interleukin-2 levels	TRUE	reported
19	55511873	C	G	0.0805	0.0169	0.7897	1.9e-06	rs1671135	11341	GCST90274806	Interleukin-2 levels	TRUE	reported
3	85289379	A	T	-0.8313	0.1793	0.003	3.55e-06	rs548182724	6752	GCST90274761	Axin-1 levels	TRUE	reported
3	128431108	A	G	0.0624	0.0134	0.4941	3.21e-06	rs2712426	11345	GCST90274761	Axin-1 levels	TRUE	reported
3	128431622	A	G	0.0626	0.0134	0.4935	2.99e-06	rs2712427	11345	GCST90274761	Axin-1 levels	TRUE	reported
3	128431843	T	G	0.0622	0.0134	0.4931	3.45e-06	rs2712428	11345	GCST90274761	Axin-1 levels	TRUE	reported
3	128432047	T	C	0.0623	0.0134	0.4941	3.33e-06	rs2811503	11345	GCST90274761	Axin-1 levels	TRUE	reported
3	128435895	A	G	0.0618	0.0135	0.5023	4.7e-06	rs2953034	11344	GCST90274761	Axin-1 levels	TRUE	reported
4	131231273	A	G	0.7375	0.1406	0.0067	1.56e-07	rs185825146	7080	GCST90274761	Axin-1 levels	TRUE	reported
4	131361673	T	G	-0.921	0.1768	0.9959	1.9e-07	rs138790688	7080	GCST90274761	Axin-1 levels	TRUE	reported
5	78787853	A	G	0.1447	0.0305	0.9489	2.09e-06	rs115455827	11792	GCST90274761	Axin-1 levels	TRUE	reported
6	133158252	A	C	-0.7745	0.1561	0.0037	6.99e-07	rs536268911	7654	GCST90274761	Axin-1 levels	TRUE	reported
6	151334529	A	T	0.2322	0.0508	0.0207	4.86e-06	rs117730999	11345	GCST90274761	Axin-1 levels	TRUE	reported
6	151334530	A	C	0.2444	0.0522	0.0197	2.84e-06	rs117097664	11345	GCST90274761	Axin-1 levels	TRUE	reported
7	55835811	A	G	-0.9282	0.1951	0.9976	1.96e-06	rs183638423	6862	GCST90274761	Axin-1 levels	TRUE	reported
7	77960243	T	C	-0.067	0.0133	0.5969	4.71e-07	rs2691530	11793	GCST90274761	Axin-1 levels	TRUE	reported
7	77960330	T	C	-0.067	0.0133	0.5979	4.71e-07	rs2691531	11793	GCST90274761	Axin-1 levels	TRUE	reported
7	77973787	T	C	0.063	0.0137	0.408	4.25e-06	rs2075014	11345	GCST90274761	Axin-1 levels	TRUE	reported
7	83692474	C	G	-0.1575	0.0341	0.9519	3.86e-06	rs138101212	9898	GCST90274761	Axin-1 levels	TRUE	reported
7	113796201	T	TC	-0.2418	0.0527	0.0275	4.47e-06	rs147621688	7943	GCST90274761	Axin-1 levels	TRUE	reported
8	38058905	T	C	-0.9762	0.2058	0.0026	2.1e-06	rs145597781	6834	GCST90274761	Axin-1 levels	TRUE	reported
8	38170124	T	C	-0.6873	0.1501	0.0056	4.67e-06	rs570809698	6752	GCST90274761	Axin-1 levels	TRUE	reported
8	93505088	A	T	-0.8803	0.1694	0.9966	2.03e-07	rs537487434	6780	GCST90274761	Axin-1 levels	TRUE	reported
8	102489704	A	G	-0.1229	0.0242	0.9127	3.8e-07	rs2470622	11345	GCST90274761	Axin-1 levels	TRUE	reported
8	143761505	A	G	-0.4779	0.1035	0.0082	3.89e-06	rs587637031	8718	GCST90274761	Axin-1 levels	TRUE	reported
9	111270251	G	GGGCAATCA	0.2602	0.0535	0.0295	1.15e-06	rs201339714	7943	GCST90274761	Axin-1 levels	TRUE	reported
11	86946145	T	C	0.6964	0.1504	0.9965	3.65e-06	rs527497911	7844	GCST90274761	Axin-1 levels	TRUE	reported
12	23752736	T	TC	0.0905	0.0198	0.1886	4.86e-06	rs149632594	8388	GCST90274761	Axin-1 levels	TRUE	reported
12	30469811	A	G	-0.9097	0.1956	0.0029	3.31e-06	rs192483999	6862	GCST90274761	Axin-1 levels	TRUE	reported
12	90111252	A	T	0.1657	0.0359	0.9437	3.92e-06	rs7136254	9827	GCST90274761	Axin-1 levels	TRUE	reported
13	83697033	A	C	0.3382	0.074	0.0152	4.87e-06	rs139044373	11345	GCST90274761	Axin-1 levels	TRUE	reported
14	51811766	T	C	-0.5134	0.1076	0.0076	1.83e-06	rs144760554	8718	GCST90274761	Axin-1 levels	TRUE	reported
15	81221771	T	C	0.1554	0.0329	0.9514	2.32e-06	rs7171268	11345	GCST90274761	Axin-1 levels	TRUE	reported
16	71410641	A	G	0.2995	0.0651	0.9878	4.21e-06	rs117269075	11786	GCST90274761	Axin-1 levels	TRUE	reported
17	3159813	C	G	0.6182	0.1338	0.9935	3.83e-06	rs548085023	6672	GCST90274761	Axin-1 levels	TRUE	reported
18	36259669	A	C	0.6137	0.1203	0.0067	3.37e-07	rs574143006	6752	GCST90274761	Axin-1 levels	TRUE	reported
18	36981958	T	G	-0.4479	0.0978	0.993	4.66e-06	rs143532204	9849	GCST90274761	Axin-1 levels	TRUE	reported
18	50508393	C	G	0.2039	0.0419	0.9704	1.14e-06	rs58521521	10919	GCST90274761	Axin-1 levels	TRUE	reported
18	50513818	A	G	-0.212	0.042	0.0295	4.47e-07	rs148317708	10919	GCST90274761	Axin-1 levels	TRUE	reported
18	50520998	A	G	-0.2006	0.0423	0.0284	2.11e-06	rs79677052	10919	GCST90274761	Axin-1 levels	TRUE	reported
18	50526780	A	G	-0.1946	0.0422	0.0285	4e-06	rs8087704	10919	GCST90274761	Axin-1 levels	TRUE	reported
18	50528029	T	C	0.1933	0.042	0.9712	4.18e-06	rs140053516	10919	GCST90274761	Axin-1 levels	TRUE	reported
18	50532814	T	C	0.1987	0.0423	0.9718	2.63e-06	rs111841928	10919	GCST90274761	Axin-1 levels	TRUE	reported
18	50534419	A	G	-0.1941	0.0423	0.0283	4.46e-06	rs111454094	10919	GCST90274761	Axin-1 levels	TRUE	reported
18	50536916	A	G	0.1998	0.0426	0.9721	2.73e-06	rs111889310	10919	GCST90274761	Axin-1 levels	TRUE	reported
18	50540268	A	G	-0.201	0.0422	0.0286	1.91e-06	rs111348489	10919	GCST90274761	Axin-1 levels	TRUE	reported
18	50548892	A	G	-0.1932	0.0423	0.0288	4.94e-06	rs114377411	10919	GCST90274761	Axin-1 levels	TRUE	reported
18	50549586	T	G	0.1975	0.0422	0.9711	2.87e-06	rs10468872	10919	GCST90274761	Axin-1 levels	TRUE	reported
18	50553222	A	C	0.2033	0.0422	0.9712	1.45e-06	rs74329619	10919	GCST90274761	Axin-1 levels	TRUE	reported
18	75309548	A	AG	0.1624	0.0348	0.0551	3.06e-06	rs147218008	8391	GCST90274761	Axin-1 levels	TRUE	reported
18	77253338	T	C	0.0692	0.0148	0.6047	2.93e-06	rs428324	10281	GCST90274761	Axin-1 levels	TRUE	reported
1	9746065	T	G	-0.1722	0.0376	0.0444	4.65e-06	rs72633862	11774	GCST90274807	Interleukin-20 levels	TRUE	reported
1	41433965	T	C	-0.2372	0.0487	0.0189	1.11e-06	rs114363239	11782	GCST90274807	Interleukin-20 levels	TRUE	reported
1	73706183	A	G	0.5926	0.1271	0.0057	3.12e-06	rs561463224	8438	GCST90274807	Interleukin-20 levels	TRUE	reported
1	104061860	T	C	-0.2721	0.0594	0.0187	4.63e-06	rs115453633	10849	GCST90274807	Interleukin-20 levels	TRUE	reported
1	104071162	A	T	0.3581	0.0672	0.9845	9.88e-08	rs114685711	10849	GCST90274807	Interleukin-20 levels	TRUE	reported
1	104358369	T	C	-0.2859	0.058	0.0181	8.25e-07	rs182740455	10849	GCST90274807	Interleukin-20 levels	TRUE	reported
1	104367844	T	C	-0.2866	0.057	0.0185	4.95e-07	rs114930791	10849	GCST90274807	Interleukin-20 levels	TRUE	reported
1	232617748	T	C	-0.6659	0.1412	0.0047	2.41e-06	rs193287223	8487	GCST90274807	Interleukin-20 levels	TRUE	reported
2	52215130	A	G	-0.2134	0.046	0.9756	3.5e-06	rs114209791	11784	GCST90274807	Interleukin-20 levels	TRUE	reported
2	126673330	T	C	-0.6755	0.1409	0.0067	1.63e-06	rs200329622	6826	GCST90274807	Interleukin-20 levels	TRUE	reported
2	141913966	T	C	-0.2551	0.0515	0.0228	7.29e-07	rs146918864	11438	GCST90274807	Interleukin-20 levels	TRUE	reported
2	141970145	C	G	-0.2476	0.0528	0.0217	2.74e-06	rs139278953	11439	GCST90274807	Interleukin-20 levels	TRUE	reported
3	1763461	T	C	-0.4683	0.0952	0.9909	8.69e-07	rs182889213	10849	GCST90274807	Interleukin-20 levels	TRUE	reported
4	133147993	A	G	0.0626	0.0137	0.32	4.89e-06	rs2133488	11769	GCST90274807	Interleukin-20 levels	TRUE	reported
4	133153293	A	G	0.0628	0.0137	0.3195	4.56e-06	rs13105689	11769	GCST90274807	Interleukin-20 levels	TRUE	reported
4	133158868	A	G	-0.0627	0.0137	0.6798	4.72e-06	rs1499327	11769	GCST90274807	Interleukin-20 levels	TRUE	reported
4	133158906	A	G	0.0629	0.0137	0.3203	4.41e-06	rs1499325	11769	GCST90274807	Interleukin-20 levels	TRUE	reported
4	133159771	C	G	0.0627	0.0137	0.3199	4.72e-06	rs11723075	11769	GCST90274807	Interleukin-20 levels	TRUE	reported
4	133162928	A	G	0.0627	0.0137	0.3198	4.72e-06	rs1499339	11770	GCST90274807	Interleukin-20 levels	TRUE	reported
4	133183457	A	G	0.0635	0.0137	0.3202	3.57e-06	rs12498781	11763	GCST90274807	Interleukin-20 levels	TRUE	reported
5	160585720	A	C	0.7591	0.1567	0.0047	1.27e-06	rs114018778	6779	GCST90274807	Interleukin-20 levels	TRUE	reported
6	10278917	A	C	0.6662	0.1454	0.9953	4.61e-06	rs142459745	7843	GCST90274807	Interleukin-20 levels	TRUE	reported
6	120228458	A	G	0.437	0.0917	0.0085	1.88e-06	rs112618644	10470	GCST90274807	Interleukin-20 levels	TRUE	reported
7	17753237	T	C	0.0719	0.0156	0.5043	4.05e-06	rs143181662	8587	GCST90274807	Interleukin-20 levels	TRUE	reported
7	54991055	A	G	0.2776	0.0597	0.9804	3.32e-06	rs6952803	10849	GCST90274807	Interleukin-20 levels	TRUE	reported
7	54991531	A	G	-0.2934	0.0596	0.0196	8.53e-07	rs111663632	10849	GCST90274807	Interleukin-20 levels	TRUE	reported
7	54991603	A	G	0.294	0.0596	0.9804	8.1e-07	rs111249483	10849	GCST90274807	Interleukin-20 levels	TRUE	reported
7	55029538	A	C	0.2754	0.06	0.9818	4.43e-06	rs115080274	10849	GCST90274807	Interleukin-20 levels	TRUE	reported
7	55031391	A	G	0.2771	0.0604	0.9826	4.48e-06	rs76159887	10849	GCST90274807	Interleukin-20 levels	TRUE	reported
7	76239511	A	G	-0.3598	0.071	0.0177	4.03e-07	rs200680034	8243	GCST90274807	Interleukin-20 levels	TRUE	reported
8	68839107	A	G	-0.3596	0.0778	0.9909	3.8e-06	rs138771212	11336	GCST90274807	Interleukin-20 levels	TRUE	reported
8	89104528	A	G	0.2901	0.062	0.0148	2.88e-06	rs28906393	11336	GCST90274807	Interleukin-20 levels	TRUE	reported
9	21125717	A	G	-0.7846	0.1666	0.9924	2.48e-06	rs111575881	6779	GCST90274807	Interleukin-20 levels	TRUE	reported
9	139876970	T	C	-0.6645	0.1448	0.0134	4.45e-06	rs78664403	6062	GCST90274807	Interleukin-20 levels	TRUE	reported
10	48455076	T	C	-0.8226	0.178	0.0036	3.81e-06	rs192676562	6861	GCST90274807	Interleukin-20 levels	TRUE	reported
11	100596026	T	C	-0.222	0.0427	0.0255	2e-07	rs188205021	11774	GCST90274807	Interleukin-20 levels	TRUE	reported
12	21612461	T	C	-0.7283	0.1478	0.0042	8.32e-07	rs35632799	6942	GCST90274807	Interleukin-20 levels	TRUE	reported
12	21642702	A	G	-0.7048	0.1373	0.0047	2.85e-07	rs35324965	7843	GCST90274807	Interleukin-20 levels	TRUE	reported
13	30085632	T	G	0.6466	0.141	0.9953	4.52e-06	rs570788033	6744	GCST90274807	Interleukin-20 levels	TRUE	reported
13	67634829	T	C	0.9244	0.2007	0.9964	4.11e-06	rs191069114	7126	GCST90274807	Interleukin-20 levels	TRUE	reported
13	110254091	C	G	-0.5876	0.1234	0.9882	1.92e-06	rs141267736	8143	GCST90274807	Interleukin-20 levels	TRUE	reported
13	110260255	A	T	-0.5769	0.1218	0.9873	2.17e-06	rs140116299	7843	GCST90274807	Interleukin-20 levels	TRUE	reported
14	21169862	T	C	-0.1232	0.0267	0.9142	3.95e-06	rs72659995	11336	GCST90274807	Interleukin-20 levels	TRUE	reported
14	73966059	A	C	0.8525	0.1794	0.0047	2.01e-06	rs59164759	8187	GCST90274807	Interleukin-20 levels	TRUE	reported
15	23769818	A	T	-0.1669	0.0365	0.9629	4.82e-06	rs74005566	11774	GCST90274807	Interleukin-20 levels	TRUE	reported
15	23769949	T	C	-0.1753	0.0372	0.965	2.45e-06	rs28542561	11774	GCST90274807	Interleukin-20 levels	TRUE	reported
15	23783392	T	C	0.1323	0.0286	0.0736	3.73e-06	rs7496623	11336	GCST90274807	Interleukin-20 levels	TRUE	reported
16	80689313	T	G	-0.1546	0.0316	0.9553	9.96e-07	rs117977288	11784	GCST90274807	Interleukin-20 levels	TRUE	reported
18	33231073	A	G	0.8994	0.1968	0.0026	4.87e-06	rs183117051	6861	GCST90274807	Interleukin-20 levels	TRUE	reported
18	33310720	T	C	1.0189	0.22	0.0018	3.63e-06	rs184880159	6861	GCST90274807	Interleukin-20 levels	TRUE	reported
18	33468953	A	T	1.0113	0.2203	0.0018	4.42e-06	rs139239758	6861	GCST90274807	Interleukin-20 levels	TRUE	reported
18	33845178	T	C	0.3674	0.0798	0.9881	4.14e-06	rs72884250	9353	GCST90274807	Interleukin-20 levels	TRUE	reported
18	58431552	G	GTT	0.3109	0.0641	0.9851	1.23e-06	rs11432579	7902	GCST90274807	Interleukin-20 levels	TRUE	reported
1	175056614	T	C	0.5977	0.1239	0.9951	1.41e-06	rs538558392	7456	GCST90274834	SIR2-like protein 2 levels	TRUE	reported
2	122731427	A	G	0.104	0.0218	0.9138	1.84e-06	rs138897138	14288	GCST90274834	SIR2-like protein 2 levels	TRUE	reported
3	9864453	A	G	-1.267	0.2501	0.9981	4.06e-07	rs527964650	6826	GCST90274834	SIR2-like protein 2 levels	TRUE	reported
3	14613224	T	C	-0.1521	0.0329	0.9617	3.78e-06	rs116198125	14727	GCST90274834	SIR2-like protein 2 levels	TRUE	reported
4	117570202	T	C	-0.4825	0.1032	0.9928	2.93e-06	rs113459525	8710	GCST90274834	SIR2-like protein 2 levels	TRUE	reported
4	131361673	T	G	-0.8422	0.1754	0.9958	1.57e-06	rs138790688	7080	GCST90274834	SIR2-like protein 2 levels	TRUE	reported
4	160629137	A	G	-0.1063	0.0229	0.0886	3.45e-06	rs60459634	14288	GCST90274834	SIR2-like protein 2 levels	TRUE	reported
5	78787853	A	G	0.1277	0.0277	0.9506	4.02e-06	rs115455827	14735	GCST90274834	SIR2-like protein 2 levels	TRUE	reported
5	79125389	C	G	-0.8441	0.183	0.0032	3.98e-06	rs112735652	6664	GCST90274834	SIR2-like protein 2 levels	TRUE	reported
5	94897863	T	C	-0.5384	0.1153	0.0066	3.02e-06	rs537309230	7456	GCST90274834	SIR2-like protein 2 levels	TRUE	reported
5	177560339	A	T	0.0639	0.0138	0.7496	3.65e-06	rs7718478	14288	GCST90274834	SIR2-like protein 2 levels	TRUE	reported
5	177571909	A	T	0.0649	0.0141	0.7605	4.17e-06	rs34342590	14288	GCST90274834	SIR2-like protein 2 levels	TRUE	reported
6	27175296	T	C	-0.3442	0.0709	0.01	1.21e-06	rs7766328	10795	GCST90274834	SIR2-like protein 2 levels	TRUE	reported
6	63413043	A	G	-0.3428	0.0737	0.989	3.3e-06	rs72883370	12737	GCST90274834	SIR2-like protein 2 levels	TRUE	reported
6	155496887	A	G	-0.5737	0.1253	0.9926	4.68e-06	rs139427879	6942	GCST90274834	SIR2-like protein 2 levels	TRUE	reported
6	158193698	A	G	0.076	0.0145	0.6981	1.59e-07	rs1034059	14288	GCST90274834	SIR2-like protein 2 levels	TRUE	reported
7	14143486	C	G	-0.1286	0.0243	0.9177	1.21e-07	rs12531843	12404	GCST90274834	SIR2-like protein 2 levels	TRUE	reported
7	45426837	A	G	-0.3225	0.0675	0.0089	1.77e-06	rs144218417	13801	GCST90274834	SIR2-like protein 2 levels	TRUE	reported
7	55835811	A	G	-0.9437	0.1951	0.9976	1.32e-06	rs183638423	6862	GCST90274834	SIR2-like protein 2 levels	TRUE	reported
8	89584780	A	G	-0.2493	0.0534	0.0152	3.03e-06	rs181762045	13801	GCST90274834	SIR2-like protein 2 levels	TRUE	reported
8	89590527	T	C	0.2573	0.0551	0.9858	3.02e-06	rs147383134	13801	GCST90274834	SIR2-like protein 2 levels	TRUE	reported
8	89628349	T	C	-0.2461	0.053	0.0152	3.43e-06	rs141054160	13801	GCST90274834	SIR2-like protein 2 levels	TRUE	reported
8	89652586	T	C	-0.2494	0.0539	0.0146	3.71e-06	rs118065382	13801	GCST90274834	SIR2-like protein 2 levels	TRUE	reported
8	89666365	A	T	-0.2476	0.0536	0.0151	3.85e-06	rs149868216	13801	GCST90274834	SIR2-like protein 2 levels	TRUE	reported
8	93505088	A	T	-0.8639	0.1693	0.9966	3.35e-07	rs537487434	6780	GCST90274834	SIR2-like protein 2 levels	TRUE	reported
9	8986302	A	AT	-0.574	0.1237	0.0057	3.48e-06	rs368318085	8911	GCST90274834	SIR2-like protein 2 levels	TRUE	reported
10	57324400	A	T	-0.5517	0.1188	0.9924	3.42e-06	rs117024324	7808	GCST90274834	SIR2-like protein 2 levels	TRUE	reported
11	38032865	C	G	-0.712	0.1545	0.0039	4.06e-06	rs531293320	6664	GCST90274834	SIR2-like protein 2 levels	TRUE	reported
12	25528188	G	GTT	-0.1075	0.0226	0.1266	1.97e-06	rs10687043	10894	GCST90274834	SIR2-like protein 2 levels	TRUE	reported
12	83600525	A	C	-0.0841	0.0184	0.8864	4.86e-06	rs11115639	14730	GCST90274834	SIR2-like protein 2 levels	TRUE	reported
12	83605538	A	T	0.084	0.0184	0.1144	4.99e-06	rs61931864	14730	GCST90274834	SIR2-like protein 2 levels	TRUE	reported
13	37413465	T	C	0.0862	0.0184	0.8546	2.8e-06	rs77381020	14288	GCST90274834	SIR2-like protein 2 levels	TRUE	reported
19	38708610	A	G	-0.3458	0.068	0.0115	3.67e-07	rs183313915	14288	GCST90274834	SIR2-like protein 2 levels	TRUE	reported
19	39058318	A	G	-0.1576	0.0334	0.0373	2.38e-06	rs117779472	14729	GCST90274834	SIR2-like protein 2 levels	TRUE	reported
19	39099395	A	G	-0.3956	0.0685	0.0133	7.69e-09	rs146969454	12291	GCST90274834	SIR2-like protein 2 levels	TRUE	reported
19	39107231	T	C	-0.1575	0.033	0.0394	1.82e-06	rs118141666	14729	GCST90274834	SIR2-like protein 2 levels	TRUE	reported
19	39128678	T	C	-0.1541	0.0328	0.0405	2.63e-06	rs189505379	14731	GCST90274834	SIR2-like protein 2 levels	TRUE	reported
19	39156747	T	G	-0.1178	0.0247	0.0675	1.85e-06	rs115125903	14723	GCST90274834	SIR2-like protein 2 levels	TRUE	reported
19	39187214	C	G	0.3612	0.0734	0.9863	8.61e-07	rs554507793	10795	GCST90274834	SIR2-like protein 2 levels	TRUE	reported
19	39203645	A	G	0.3416	0.0704	0.9885	1.22e-06	rs541531235	10894	GCST90274834	SIR2-like protein 2 levels	TRUE	reported
19	39205294	A	G	-0.3539	0.0658	0.0146	7.51e-08	rs528178848	12291	GCST90274834	SIR2-like protein 2 levels	TRUE	reported
19	39267494	C	G	-0.1784	0.0335	0.0388	1.01e-07	rs77384368	14728	GCST90274834	SIR2-like protein 2 levels	TRUE	reported
19	39290076	A	G	0.1442	0.0314	0.9535	4.38e-06	rs78164669	14719	GCST90274834	SIR2-like protein 2 levels	TRUE	reported
19	39290113	A	G	-0.15	0.0319	0.0438	2.57e-06	rs118058031	14719	GCST90274834	SIR2-like protein 2 levels	TRUE	reported
19	39294675	A	G	-0.1479	0.0319	0.0434	3.55e-06	rs79532170	14719	GCST90274834	SIR2-like protein 2 levels	TRUE	reported
19	39299312	A	G	-0.1559	0.0321	0.0424	1.19e-06	rs117080893	14719	GCST90274834	SIR2-like protein 2 levels	TRUE	reported
19	39327916	CG	C	-0.4489	0.0671	0.0113	2.23e-11	rs537302886	11338	GCST90274834	SIR2-like protein 2 levels	TRUE	reported
19	39338570	C	G	0.4772	0.0587	0.9843	4.31e-16	rs139498781	13223	GCST90274834	SIR2-like protein 2 levels	TRUE	reported
19	39379770	T	C	-0.5739	0.0515	0.0161	7.69e-29	rs144373891	14736	GCST90274834	SIR2-like protein 2 levels	TRUE	reported
19	39397594	A	T	0.5363	0.0559	0.9853	8.48e-22	rs190925604	14248	GCST90274834	SIR2-like protein 2 levels	TRUE	reported
19	39407775	A	C	-0.0728	0.0153	0.8169	1.95e-06	rs10415194	14727	GCST90274834	SIR2-like protein 2 levels	TRUE	reported
19	39410986	C	G	-0.0751	0.0152	0.8169	7.78e-07	rs12460327	14727	GCST90274834	SIR2-like protein 2 levels	TRUE	reported
19	39412445	A	G	0.0737	0.0154	0.1843	1.7e-06	rs10412886	14288	GCST90274834	SIR2-like protein 2 levels	TRUE	reported
19	39414654	T	C	0.0737	0.0154	0.1839	1.7e-06	rs28375245	14288	GCST90274834	SIR2-like protein 2 levels	TRUE	reported
19	39416403	A	G	-0.5705	0.0564	0.0139	4.73e-24	rs146398048	14736	GCST90274834	SIR2-like protein 2 levels	TRUE	reported
19	39416409	A	G	0.0751	0.0155	0.1835	1.27e-06	rs751941	14288	GCST90274834	SIR2-like protein 2 levels	TRUE	reported
19	39424421	A	G	0.0771	0.0159	0.1738	1.24e-06	rs10410176	14288	GCST90274834	SIR2-like protein 2 levels	TRUE	reported
19	39427860	T	C	0.0766	0.0159	0.174	1.45e-06	rs2116854	14287	GCST90274834	SIR2-like protein 2 levels	TRUE	reported
19	39427886	T	C	-0.0778	0.016	0.8269	1.16e-06	rs2116855	14288	GCST90274834	SIR2-like protein 2 levels	TRUE	reported
19	39430902	A	G	-0.0773	0.0159	0.8249	1.16e-06	rs10407879	14288	GCST90274834	SIR2-like protein 2 levels	TRUE	reported
19	39432136	A	G	0.0773	0.0159	0.1735	1.16e-06	rs1134180	14288	GCST90274834	SIR2-like protein 2 levels	TRUE	reported
19	39483894	A	G	0.5036	0.0581	0.9868	4.4e-18	rs144108680	14733	GCST90274834	SIR2-like protein 2 levels	TRUE	reported
19	39544063	C	G	-0.4808	0.0626	0.0126	1.58e-14	rs137897977	14288	GCST90274834	SIR2-like protein 2 levels	TRUE	reported
21	36485366	T	C	-0.6438	0.1367	0.9939	2.48e-06	rs116990787	7162	GCST90274834	SIR2-like protein 2 levels	TRUE	reported
22	38449700	A	G	-0.5293	0.1117	0.0094	2.15e-06	rs191689121	6178	GCST90274834	SIR2-like protein 2 levels	TRUE	reported
22	45002809	A	G	0.0965	0.0208	0.885	3.49e-06	rs12152184	12402	GCST90274834	SIR2-like protein 2 levels	TRUE	reported
1	37473314	T	C	0.1661	0.0361	0.0436	4.2e-06	rs114829303	11344	GCST90274814	Interleukin-5 levels	TRUE	reported
1	158173473	T	C	-0.6343	0.1388	0.0063	4.88e-06	rs147559957	7843	GCST90274814	Interleukin-5 levels	TRUE	reported
1	208047113	T	C	0.1199	0.0246	0.9188	1.09e-06	rs74150713	11790	GCST90274814	Interleukin-5 levels	TRUE	reported
1	208048303	A	G	0.1189	0.0243	0.9174	9.93e-07	rs74150714	11790	GCST90274814	Interleukin-5 levels	TRUE	reported
1	208050301	A	G	0.113	0.0234	0.9092	1.37e-06	rs17009221	11789	GCST90274814	Interleukin-5 levels	TRUE	reported
1	208050360	A	G	-0.1169	0.0236	0.0881	7.29e-07	rs17009223	11789	GCST90274814	Interleukin-5 levels	TRUE	reported
1	208052459	C	G	-0.1093	0.0233	0.0914	2.72e-06	rs60200450	11789	GCST90274814	Interleukin-5 levels	TRUE	reported
2	6826644	A	C	0.6354	0.1281	0.0112	7.04e-07	rs138390280	6751	GCST90274814	Interleukin-5 levels	TRUE	reported
2	176448561	C	G	-0.642	0.1392	0.0072	3.99e-06	rs182363341	7843	GCST90274814	Interleukin-5 levels	TRUE	reported
2	193465147	A	C	0.5419	0.1187	0.0161	4.99e-06	rs191364886	7349	GCST90274814	Interleukin-5 levels	TRUE	reported
4	35700630	T	G	0.205	0.0424	0.0508	1.33e-06	rs534010680	7942	GCST90274814	Interleukin-5 levels	TRUE	reported
4	179984840	T	C	0.4866	0.1017	0.9912	1.71e-06	rs150123530	9361	GCST90274814	Interleukin-5 levels	TRUE	reported
5	53724164	A	T	0.4367	0.0942	0.9927	3.55e-06	rs149204160	10213	GCST90274814	Interleukin-5 levels	TRUE	reported
5	95454131	A	G	-0.0654	0.0141	0.3345	3.51e-06	rs4077349	11344	GCST90274814	Interleukin-5 levels	TRUE	reported
5	95454863	A	G	0.0657	0.0141	0.6656	3.17e-06	rs4078170	11343	GCST90274814	Interleukin-5 levels	TRUE	reported
5	95454983	A	T	0.0673	0.0141	0.6654	1.81e-06	rs4078169	11344	GCST90274814	Interleukin-5 levels	TRUE	reported
5	95469008	A	C	0.066	0.0141	0.6628	2.86e-06	rs4869261	11344	GCST90274814	Interleukin-5 levels	TRUE	reported
5	95478215	A	G	0.0631	0.0138	0.6576	4.82e-06	rs6889982	11773	GCST90274814	Interleukin-5 levels	TRUE	reported
5	95478246	A	G	0.0631	0.0138	0.6576	4.82e-06	rs13165259	11773	GCST90274814	Interleukin-5 levels	TRUE	reported
5	95488078	T	C	0.0631	0.0138	0.6585	4.82e-06	rs10069928	11771	GCST90274814	Interleukin-5 levels	TRUE	reported
5	95495896	A	G	-0.0631	0.0138	0.3421	4.82e-06	rs6867520	11787	GCST90274814	Interleukin-5 levels	TRUE	reported
5	95518015	A	G	-0.0723	0.0147	0.2722	8.73e-07	rs34713740	11772	GCST90274814	Interleukin-5 levels	TRUE	reported
5	95522088	A	G	-0.0751	0.0149	0.2769	4.65e-07	rs6866846	11344	GCST90274814	Interleukin-5 levels	TRUE	reported
5	95530542	A	G	0.0765	0.0147	0.7289	1.95e-07	rs34639000	11773	GCST90274814	Interleukin-5 levels	TRUE	reported
5	95533474	T	G	-0.0772	0.0149	0.2746	2.2e-07	rs7444135	11344	GCST90274814	Interleukin-5 levels	TRUE	reported
5	95547545	A	G	0.0746	0.0149	0.7254	5.54e-07	rs4529218	11344	GCST90274814	Interleukin-5 levels	TRUE	reported
5	95548653	T	C	-0.076	0.0147	0.2706	2.34e-07	rs34973883	11775	GCST90274814	Interleukin-5 levels	TRUE	reported
5	95553781	T	G	0.0764	0.0149	0.725	2.94e-07	rs10866767	11343	GCST90274814	Interleukin-5 levels	TRUE	reported
5	95554891	T	C	0.0753	0.0149	0.7253	4.33e-07	rs4637573	11344	GCST90274814	Interleukin-5 levels	TRUE	reported
5	95555000	A	G	0.0754	0.015	0.7312	4.99e-07	rs11948972	11344	GCST90274814	Interleukin-5 levels	TRUE	reported
5	95555247	T	C	-0.0769	0.0149	0.2762	2.46e-07	rs4424016	11344	GCST90274814	Interleukin-5 levels	TRUE	reported
5	95572369	T	C	-0.0763	0.015	0.2711	3.64e-07	rs13178392	11344	GCST90274814	Interleukin-5 levels	TRUE	reported
5	95576642	A	G	0.0766	0.015	0.7299	3.28e-07	rs4869276	11344	GCST90274814	Interleukin-5 levels	TRUE	reported
5	95588399	T	G	0.076	0.0149	0.7259	3.38e-07	rs11959068	11344	GCST90274814	Interleukin-5 levels	TRUE	reported
5	95591317	T	C	0.076	0.015	0.7315	4.05e-07	rs12659143	11344	GCST90274814	Interleukin-5 levels	TRUE	reported
5	95600495	A	G	0.0727	0.0148	0.7304	9.01e-07	rs34023054	11773	GCST90274814	Interleukin-5 levels	TRUE	reported
5	95613023	A	C	-0.0723	0.0149	0.2739	1.22e-06	rs3922467	11344	GCST90274814	Interleukin-5 levels	TRUE	reported
5	95641484	A	G	-0.0718	0.0148	0.2691	1.23e-06	rs11747615	11779	GCST90274814	Interleukin-5 levels	TRUE	reported
5	95648728	T	C	-0.0727	0.0148	0.2693	9.01e-07	rs13181198	11780	GCST90274814	Interleukin-5 levels	TRUE	reported
5	95661486	T	C	-0.076	0.0162	0.2234	2.71e-06	rs6869899	11792	GCST90274814	Interleukin-5 levels	TRUE	reported
5	95678301	T	C	-0.0721	0.0147	0.2775	9.35e-07	rs1995186	11788	GCST90274814	Interleukin-5 levels	TRUE	reported
5	95692267	T	C	0.0747	0.0147	0.7244	3.74e-07	rs112799558	11782	GCST90274814	Interleukin-5 levels	TRUE	reported
5	95700778	A	G	-0.0716	0.0147	0.2761	1.11e-06	rs28857195	11782	GCST90274814	Interleukin-5 levels	TRUE	reported
5	95703719	A	C	-0.0722	0.0146	0.2771	7.61e-07	rs11135456	11783	GCST90274814	Interleukin-5 levels	TRUE	reported
5	95704305	T	G	-0.0865	0.0176	0.2678	8.89e-07	rs11948824	8297	GCST90274814	Interleukin-5 levels	TRUE	reported
5	95711601	A	C	-0.0827	0.0169	0.2603	9.91e-07	rs7448553	9461	GCST90274814	Interleukin-5 levels	TRUE	reported
5	95728440	A	G	0.0749	0.0146	0.7197	2.9e-07	rs3811942	11785	GCST90274814	Interleukin-5 levels	TRUE	reported
5	95730461	T	C	-0.0719	0.0146	0.2812	8.45e-07	rs11741888	11786	GCST90274814	Interleukin-5 levels	TRUE	reported
5	95732768	A	T	0.0733	0.0147	0.7193	6.15e-07	rs11135457	11787	GCST90274814	Interleukin-5 levels	TRUE	reported
6	124474284	A	G	0.3833	0.0825	0.9859	3.38e-06	rs141941146	10280	GCST90274814	Interleukin-5 levels	TRUE	reported
7	33748891	T	TATAA	-0.4682	0.0946	0.0127	7.45e-07	rs201996714	7456	GCST90274814	Interleukin-5 levels	TRUE	reported
7	85358256	A	C	0.518	0.113	0.9913	4.56e-06	rs77916179	6941	GCST90274814	Interleukin-5 levels	TRUE	reported
8	103597998	C	G	-0.6407	0.1368	0.0064	2.82e-06	rs141609101	8487	GCST90274814	Interleukin-5 levels	TRUE	reported
9	132281601	A	G	0.0777	0.0167	0.2002	3.28e-06	rs10988407	11791	GCST90274814	Interleukin-5 levels	TRUE	reported
10	4740043	T	G	-0.1939	0.0424	0.947	4.81e-06	rs201180858	7943	GCST90274814	Interleukin-5 levels	TRUE	reported
10	8132034	A	AT	-0.2449	0.048	0.9701	3.36e-07	rs201464214	8377	GCST90274814	Interleukin-5 levels	TRUE	reported
11	10380223	A	G	-0.2747	0.0592	0.9858	3.48e-06	rs4277106	11790	GCST90274814	Interleukin-5 levels	TRUE	reported
13	78234635	A	C	-0.2292	0.0499	0.0477	4.37e-06	rs12864018	7943	GCST90274814	Interleukin-5 levels	TRUE	reported
14	93316119	A	G	-0.0924	0.0188	0.1442	8.88e-07	rs7142197	11773	GCST90274814	Interleukin-5 levels	TRUE	reported
15	70546132	T	C	0.0838	0.0173	0.8068	1.27e-06	rs12592185	11344	GCST90274814	Interleukin-5 levels	TRUE	reported
16	50402890	CG	C	-0.131	0.0276	0.8956	2.07e-06	rs574212560	7943	GCST90274814	Interleukin-5 levels	TRUE	reported
16	86933894	C	G	0.2407	0.0521	0.0351	3.84e-06	rs7193141	9377	GCST90274814	Interleukin-5 levels	TRUE	reported
17	59402478	A	G	0.2206	0.0482	0.0267	4.72e-06	rs62069649	10431	GCST90274814	Interleukin-5 levels	TRUE	reported
22	48143877	A	T	0.0659	0.0141	0.6817	2.96e-06	rs132209	11786	GCST90274814	Interleukin-5 levels	TRUE	reported
22	48143913	T	C	-0.0686	0.0141	0.3408	1.14e-06	rs132210	11344	GCST90274814	Interleukin-5 levels	TRUE	reported
22	48144783	T	G	0.0607	0.013	0.5105	3.02e-06	rs6008372	11791	GCST90274814	Interleukin-5 levels	TRUE	reported
22	48144844	A	G	0.0671	0.014	0.6749	1.64e-06	rs132212	11786	GCST90274814	Interleukin-5 levels	TRUE	reported
1	162870982	A	C	0.0633	0.0135	0.3543	2.75e-06	rs35038847	11768	GCST90274799	Interleukin-13 levels	TRUE	reported
1	162876963	A	G	-0.0661	0.0134	0.6434	8.1e-07	rs12743325	11790	GCST90274799	Interleukin-13 levels	TRUE	reported
1	162877621	A	G	0.0632	0.0134	0.3543	2.4e-06	rs10917635	11791	GCST90274799	Interleukin-13 levels	TRUE	reported
1	162878023	T	G	0.0641	0.0134	0.3551	1.72e-06	rs10917636	11792	GCST90274799	Interleukin-13 levels	TRUE	reported
1	162878651	A	G	0.0692	0.0136	0.3447	3.61e-07	rs10917637	11772	GCST90274799	Interleukin-13 levels	TRUE	reported
1	162881137	T	C	-0.066	0.0134	0.6418	8.42e-07	rs10917638	11778	GCST90274799	Interleukin-13 levels	TRUE	reported
1	162881284	A	G	-0.0655	0.0135	0.647	1.22e-06	rs10917639	11775	GCST90274799	Interleukin-13 levels	TRUE	reported
1	162882557	T	C	0.0657	0.0135	0.3567	1.13e-06	rs11811645	11776	GCST90274799	Interleukin-13 levels	TRUE	reported
1	162883597	T	C	-0.0678	0.0139	0.6455	1.07e-06	rs10753595	11344	GCST90274799	Interleukin-13 levels	TRUE	reported
1	162885321	C	G	-0.0674	0.0139	0.6458	1.24e-06	rs12141849	11344	GCST90274799	Interleukin-13 levels	TRUE	reported
1	162885581	A	G	0.0689	0.0139	0.354	7.17e-07	rs35081778	11344	GCST90274799	Interleukin-13 levels	TRUE	reported
1	162886775	A	G	-0.0683	0.0139	0.6462	8.94e-07	rs12132788	11343	GCST90274799	Interleukin-13 levels	TRUE	reported
1	162888214	T	C	-0.07	0.0139	0.6394	4.75e-07	rs11585524	11344	GCST90274799	Interleukin-13 levels	TRUE	reported
1	193545592	T	C	0.193	0.039	0.9443	7.47e-07	rs538021311	7943	GCST90274799	Interleukin-13 levels	TRUE	reported
3	22448917	T	C	-1.1828	0.2573	0.9979	4.29e-06	rs6790282	6861	GCST90274799	Interleukin-13 levels	TRUE	reported
3	123694975	A	G	0.0654	0.0141	0.6881	3.51e-06	rs6810298	11764	GCST90274799	Interleukin-13 levels	TRUE	reported
3	123696930	A	G	-0.0636	0.0138	0.3737	4.05e-06	rs2280422	11344	GCST90274799	Interleukin-13 levels	TRUE	reported
3	123701168	T	C	0.0653	0.0141	0.687	3.64e-06	rs10511422	11770	GCST90274799	Interleukin-13 levels	TRUE	reported
3	123702960	A	G	-0.0656	0.0141	0.3094	3.28e-06	rs9881117	11791	GCST90274799	Interleukin-13 levels	TRUE	reported
3	143068250	A	G	0.064	0.0132	0.3961	1.24e-06	rs10446322	11777	GCST90274799	Interleukin-13 levels	TRUE	reported
4	40925813	A	G	-0.062	0.0129	0.4924	1.54e-06	rs6830637	11773	GCST90274799	Interleukin-13 levels	TRUE	reported
4	40928240	A	G	-0.0609	0.0129	0.4911	2.35e-06	rs12506307	11773	GCST90274799	Interleukin-13 levels	TRUE	reported
4	40931566	C	G	-0.0613	0.0129	0.494	2.01e-06	rs11733818	11772	GCST90274799	Interleukin-13 levels	TRUE	reported
4	40931712	A	G	-0.0617	0.0129	0.492	1.73e-06	rs11733857	11773	GCST90274799	Interleukin-13 levels	TRUE	reported
4	40932029	A	G	0.0609	0.0129	0.5079	2.35e-06	rs12499071	11772	GCST90274799	Interleukin-13 levels	TRUE	reported
4	40937353	A	T	0.0739	0.0133	0.4947	2.75e-08	rs3924967	11344	GCST90274799	Interleukin-13 levels	TRUE	reported
4	40938348	A	G	0.0737	0.0133	0.4957	3e-08	rs13118733	11344	GCST90274799	Interleukin-13 levels	TRUE	reported
4	40938582	A	G	0.0739	0.0132	0.4958	2.16e-08	rs13119159	11344	GCST90274799	Interleukin-13 levels	TRUE	reported
4	40938623	T	G	0.0729	0.0132	0.4911	3.34e-08	rs13125675	11344	GCST90274799	Interleukin-13 levels	TRUE	reported
4	40938930	A	G	0.0741	0.0133	0.4959	2.53e-08	rs4861071	11344	GCST90274799	Interleukin-13 levels	TRUE	reported
4	40939025	T	C	0.0737	0.0133	0.4952	3e-08	rs4861072	11344	GCST90274799	Interleukin-13 levels	TRUE	reported
4	43441875	A	G	-1.1176	0.2429	0.0017	4.2e-06	rs28736476	6861	GCST90274799	Interleukin-13 levels	TRUE	reported
4	43442236	A	G	1.2125	0.2583	0.9985	2.68e-06	rs10000331	6861	GCST90274799	Interleukin-13 levels	TRUE	reported
4	43447183	T	C	-1.2636	0.2617	0.0016	1.38e-06	rs28516923	6861	GCST90274799	Interleukin-13 levels	TRUE	reported
5	9974643	C	G	-0.2968	0.0628	0.9858	2.29e-06	rs183684201	11782	GCST90274799	Interleukin-13 levels	TRUE	reported
5	15749279	A	G	0.2909	0.0609	0.9763	1.78e-06	rs192418369	8460	GCST90274799	Interleukin-13 levels	TRUE	reported
5	15797908	A	G	-0.3296	0.0679	0.0198	1.21e-06	rs184817283	7802	GCST90274799	Interleukin-13 levels	TRUE	reported
5	162965740	A	C	-0.7521	0.1602	0.0034	2.67e-06	rs559935694	6861	GCST90274799	Interleukin-13 levels	TRUE	reported
5	162995328	A	T	-0.7568	0.1642	0.003	4.05e-06	rs185391698	6861	GCST90274799	Interleukin-13 levels	TRUE	reported
6	41578540	CCATT	C	0.1527	0.0329	0.9265	3.46e-06	rs201810444	7943	GCST90274799	Interleukin-13 levels	TRUE	reported
6	41586757	G	GCTGTACTCTCCCCAAA	-0.1529	0.0329	0.0739	3.36e-06	rs148628995	7943	GCST90274799	Interleukin-13 levels	TRUE	reported
6	164657365	T	C	0.5747	0.1187	0.0076	1.29e-06	rs140509073	10362	GCST90274799	Interleukin-13 levels	TRUE	reported
7	61999529	A	G	0.1832	0.039	0.9229	2.63e-06	rs149979178	6901	GCST90274799	Interleukin-13 levels	TRUE	reported
7	61999530	T	G	-0.1851	0.0401	0.0787	3.91e-06	rs140335200	6257	GCST90274799	Interleukin-13 levels	TRUE	reported
7	149856891	T	G	0.8422	0.182	0.0039	3.7e-06	rs544324770	6834	GCST90274799	Interleukin-13 levels	TRUE	reported
7	154418309	A	G	0.169	0.0357	0.0397	2.2e-06	rs76219628	11344	GCST90274799	Interleukin-13 levels	TRUE	reported
10	3623961	A	G	-0.1845	0.0397	0.0751	3.36e-06	rs11251952	11344	GCST90274799	Interleukin-13 levels	TRUE	reported
10	53942324	T	G	0.0734	0.0155	0.3902	2.19e-06	rs12146346	8388	GCST90274799	Interleukin-13 levels	TRUE	reported
11	83811296	A	AGC	-0.4944	0.1017	0.9883	1.17e-06	rs71904058	6447	GCST90274799	Interleukin-13 levels	TRUE	reported
11	123332970	C	G	-0.0702	0.015	0.6744	2.87e-06	rs10893042	11344	GCST90274799	Interleukin-13 levels	TRUE	reported
13	41810092	T	C	0.2093	0.0446	0.9682	2.69e-06	rs141726773	11344	GCST90274799	Interleukin-13 levels	TRUE	reported
15	57829298	T	C	-0.0884	0.0181	0.8506	1.04e-06	rs16977582	11787	GCST90274799	Interleukin-13 levels	TRUE	reported
15	57830694	T	C	-0.0934	0.0183	0.8535	3.33e-07	rs55924857	11792	GCST90274799	Interleukin-13 levels	TRUE	reported
16	79910374	A	G	-0.1672	0.0366	0.9657	4.92e-06	rs74038077	11791	GCST90274799	Interleukin-13 levels	TRUE	reported
16	79925921	T	G	0.176	0.0372	0.0333	2.23e-06	rs60163449	11791	GCST90274799	Interleukin-13 levels	TRUE	reported
16	79962359	T	C	-0.2025	0.0438	0.9725	3.78e-06	rs75255752	11782	GCST90274799	Interleukin-13 levels	TRUE	reported
16	79967987	T	G	0.2077	0.0434	0.0278	1.7e-06	rs77861963	11783	GCST90274799	Interleukin-13 levels	TRUE	reported
16	79970722	T	C	0.2015	0.0438	0.0274	4.22e-06	rs77100687	11785	GCST90274799	Interleukin-13 levels	TRUE	reported
16	79975961	T	C	-0.2071	0.0438	0.9726	2.26e-06	rs75468303	11785	GCST90274799	Interleukin-13 levels	TRUE	reported
16	79977146	T	G	-0.2058	0.0441	0.9728	3.06e-06	rs74963012	11785	GCST90274799	Interleukin-13 levels	TRUE	reported
16	79977435	A	C	-0.2039	0.0441	0.9726	3.77e-06	rs16951719	11784	GCST90274799	Interleukin-13 levels	TRUE	reported
16	79977921	A	G	0.2122	0.0439	0.0274	1.34e-06	rs59235092	11784	GCST90274799	Interleukin-13 levels	TRUE	reported
16	79979713	A	G	-0.2049	0.0439	0.9725	3.05e-06	rs4889048	11784	GCST90274799	Interleukin-13 levels	TRUE	reported
16	79980444	A	T	-0.2038	0.0446	0.9726	4.89e-06	rs77136260	11785	GCST90274799	Interleukin-13 levels	TRUE	reported
16	79980446	T	C	0.2091	0.0456	0.0266	4.53e-06	rs79462615	11785	GCST90274799	Interleukin-13 levels	TRUE	reported
18	62252839	A	G	0.6701	0.1468	0.0039	5e-06	rs186185483	6304	GCST90274799	Interleukin-13 levels	TRUE	reported
21	14809473	T	TA	0.1357	0.0295	0.9082	4.22e-06	rs199920695	6879	GCST90274799	Interleukin-13 levels	TRUE	reported
21	14821151	CAT	C	0.1421	0.0298	0.9018	1.86e-06	rs55779922	6879	GCST90274799	Interleukin-13 levels	TRUE	reported
21	14826948	T	TTGTTAA	-0.1417	0.0301	0.0961	2.51e-06	rs113436668	6879	GCST90274799	Interleukin-13 levels	TRUE	reported
21	14833277	A	AAT	-0.1428	0.0312	0.0913	4.72e-06	rs149600269	6879	GCST90274799	Interleukin-13 levels	TRUE	reported
1	145375875	CTT	C	-0.2093	0.044	0.9592	1.97e-06	rs201553639	6879	GCST90274813	Interleukin-4 levels	TRUE	reported
1	145427960	C	G	0.1919	0.0417	0.0407	4.19e-06	rs10910814	7953	GCST90274813	Interleukin-4 levels	TRUE	reported
1	145441840	T	TA	-0.1944	0.0414	0.9568	2.66e-06	rs3832003	7943	GCST90274813	Interleukin-4 levels	TRUE	reported
1	145447297	G	GA	-0.1932	0.0415	0.9568	3.23e-06	rs60471976	7943	GCST90274813	Interleukin-4 levels	TRUE	reported
1	145500921	CTA	C	-0.2048	0.044	0.9591	3.25e-06	rs61579111	6879	GCST90274813	Interleukin-4 levels	TRUE	reported
1	243071390	T	C	-0.077	0.0167	0.2195	4.01e-06	rs2502347	11345	GCST90274813	Interleukin-4 levels	TRUE	reported
2	8725650	CT	C	-0.0888	0.0194	0.7288	4.71e-06	rs59602290	7943	GCST90274813	Interleukin-4 levels	TRUE	reported
2	71146515	T	G	-0.8952	0.1931	0.0038	3.55e-06	rs115293078	5540	GCST90274813	Interleukin-4 levels	TRUE	reported
2	107668175	A	G	0.0701	0.0153	0.7233	4.61e-06	rs13418255	11345	GCST90274813	Interleukin-4 levels	TRUE	reported
2	150821861	T	C	0.4863	0.1059	0.9933	4.39e-06	rs149171838	8438	GCST90274813	Interleukin-4 levels	TRUE	reported
2	150872271	T	C	-0.5874	0.1206	0.0062	1.11e-06	rs575102311	7456	GCST90274813	Interleukin-4 levels	TRUE	reported
2	178971684	CA	C	0.2102	0.0454	0.9573	3.66e-06	rs575714643	7943	GCST90274813	Interleukin-4 levels	TRUE	reported
4	40129291	A	T	0.0845	0.0183	0.7579	3.88e-06	rs13106642	8298	GCST90274813	Interleukin-4 levels	TRUE	reported
4	40137331	T	C	-0.0703	0.0154	0.2421	5e-06	rs11097016	11791	GCST90274813	Interleukin-4 levels	TRUE	reported
4	40147739	T	C	-0.0763	0.0157	0.2418	1.17e-06	rs71608016	11345	GCST90274813	Interleukin-4 levels	TRUE	reported
4	40150211	T	C	-0.0761	0.0157	0.2413	1.25e-06	rs34084471	11345	GCST90274813	Interleukin-4 levels	TRUE	reported
4	40153255	T	C	0.0753	0.0157	0.7582	1.62e-06	rs11735047	11345	GCST90274813	Interleukin-4 levels	TRUE	reported
4	40153409	T	C	0.0759	0.0157	0.7607	1.34e-06	rs11735928	11344	GCST90274813	Interleukin-4 levels	TRUE	reported
4	40154233	A	G	-0.0757	0.0157	0.2417	1.42e-06	rs11722533	11345	GCST90274813	Interleukin-4 levels	TRUE	reported
4	40156881	A	G	-0.0773	0.0159	0.2374	1.16e-06	rs13130198	11345	GCST90274813	Interleukin-4 levels	TRUE	reported
4	40160534	T	C	-0.0727	0.0153	0.2589	2.02e-06	rs9993439	11345	GCST90274813	Interleukin-4 levels	TRUE	reported
4	40164529	C	G	0.0734	0.0153	0.7382	1.61e-06	rs67569805	11345	GCST90274813	Interleukin-4 levels	TRUE	reported
4	40380879	T	C	-0.3215	0.0697	0.0147	3.98e-06	rs79259958	9956	GCST90274813	Interleukin-4 levels	TRUE	reported
4	184229027	G	GA	-0.3744	0.0807	0.0159	3.49e-06	rs201032197	6447	GCST90274813	Interleukin-4 levels	TRUE	reported
4	185524363	A	G	-0.1167	0.0252	0.9104	3.64e-06	rs140070275	11793	GCST90274813	Interleukin-4 levels	TRUE	reported
4	185524583	T	C	0.1162	0.0254	0.0887	4.77e-06	rs72629647	11793	GCST90274813	Interleukin-4 levels	TRUE	reported
4	185525646	T	C	0.0624	0.0136	0.4543	4.47e-06	rs6839422	11345	GCST90274813	Interleukin-4 levels	TRUE	reported
4	185529634	C	G	-0.1181	0.025	0.9065	2.31e-06	rs12641440	11345	GCST90274813	Interleukin-4 levels	TRUE	reported
4	185530006	T	C	0.1167	0.0254	0.0828	4.34e-06	rs12641569	11345	GCST90274813	Interleukin-4 levels	TRUE	reported
4	185531158	A	G	0.0621	0.0134	0.4803	3.58e-06	rs12501768	11345	GCST90274813	Interleukin-4 levels	TRUE	reported
4	185534725	A	C	0.0615	0.0133	0.4753	3.76e-06	rs6839175	11345	GCST90274813	Interleukin-4 levels	TRUE	reported
4	185535085	T	G	0.0753	0.0157	0.482	1.62e-06	rs6552795	8100	GCST90274813	Interleukin-4 levels	TRUE	reported
4	185539899	A	T	-0.0669	0.0146	0.5202	4.6e-06	rs2091476	9461	GCST90274813	Interleukin-4 levels	TRUE	reported
5	153904876	T	G	0.4945	0.101	0.006	9.78e-07	rs190303812	9956	GCST90274813	Interleukin-4 levels	TRUE	reported
6	32006317	T	C	-0.1026	0.0224	0.7832	4.64e-06	rs6468	6414	GCST90274813	Interleukin-4 levels	TRUE	reported
6	32494883	A	G	0.1109	0.0239	0.321	3.48e-06	rs73407287	6027	GCST90274813	Interleukin-4 levels	TRUE	reported
6	32496794	A	T	-0.12	0.0258	0.829	3.3e-06	rs113015546	6254	GCST90274813	Interleukin-4 levels	TRUE	reported
6	32497655	A	C	0.1216	0.0258	0.1552	2.44e-06	rs67987819	6257	GCST90274813	Interleukin-4 levels	TRUE	reported
6	32501211	A	G	0.1167	0.0248	0.1814	2.53e-06	rs111379218	6239	GCST90274813	Interleukin-4 levels	TRUE	reported
6	32503575	C	G	0.1142	0.0246	0.1848	3.45e-06	rs75744841	6239	GCST90274813	Interleukin-4 levels	TRUE	reported
6	32527386	A	G	0.0943	0.0204	0.3181	3.79e-06	rs116659316	6257	GCST90274813	Interleukin-4 levels	TRUE	reported
6	32546485	A	G	0.1144	0.0249	0.1593	4.34e-06	rs9269674	6197	GCST90274813	Interleukin-4 levels	TRUE	reported
6	32548786	T	C	0.1156	0.0245	0.1601	2.38e-06	rs9269773	6254	GCST90274813	Interleukin-4 levels	TRUE	reported
6	32549596	T	C	0.1155	0.025	0.1567	3.84e-06	rs2308759	6257	GCST90274813	Interleukin-4 levels	TRUE	reported
6	32549849	T	C	-0.1146	0.025	0.842	4.56e-06	rs9269825	6257	GCST90274813	Interleukin-4 levels	TRUE	reported
6	32550272	A	G	0.1166	0.0248	0.1681	2.58e-06	rs7745797	6257	GCST90274813	Interleukin-4 levels	TRUE	reported
6	32552983	A	G	0.1163	0.025	0.1599	3.29e-06	rs9270015	6257	GCST90274813	Interleukin-4 levels	TRUE	reported
6	32553003	T	C	0.1157	0.0249	0.1573	3.37e-06	rs9270016	6257	GCST90274813	Interleukin-4 levels	TRUE	reported
6	32554774	A	G	0.1145	0.0248	0.1641	3.89e-06	rs9270107	6257	GCST90274813	Interleukin-4 levels	TRUE	reported
6	32555357	T	C	0.1107	0.024	0.1765	3.98e-06	rs9270150	6256	GCST90274813	Interleukin-4 levels	TRUE	reported
6	32556783	T	C	0.1212	0.0255	0.1501	2e-06	rs9270229	6252	GCST90274813	Interleukin-4 levels	TRUE	reported
6	35764540	A	G	0.085	0.0179	0.5892	2.05e-06	rs2766594	7943	GCST90274813	Interleukin-4 levels	TRUE	reported
6	147429689	T	G	-1.1242	0.2445	0.0019	4.27e-06	rs187051012	6780	GCST90274813	Interleukin-4 levels	TRUE	reported
7	2938066	A	T	0.449	0.0914	0.9882	8.99e-07	rs549453778	7456	GCST90274813	Interleukin-4 levels	TRUE	reported
7	37360244	T	C	-0.5585	0.118	0.0078	2.21e-06	rs144691163	7816	GCST90274813	Interleukin-4 levels	TRUE	reported
8	22645530	T	C	0.0635	0.0136	0.5963	3.02e-06	rs12678150	11345	GCST90274813	Interleukin-4 levels	TRUE	reported
8	22646918	A	T	-0.0623	0.0136	0.4026	4.63e-06	rs4872013	11345	GCST90274813	Interleukin-4 levels	TRUE	reported
8	22647850	T	C	0.063	0.0135	0.588	3.06e-06	rs17088625	11345	GCST90274813	Interleukin-4 levels	TRUE	reported
8	22649540	CTTT	C	-0.0768	0.0165	0.3795	3.25e-06	rs34005416	7943	GCST90274813	Interleukin-4 levels	TRUE	reported
8	22649572	A	G	0.0669	0.0136	0.6132	8.69e-07	rs10103275	11344	GCST90274813	Interleukin-4 levels	TRUE	reported
8	22649912	A	G	0.0678	0.0136	0.5982	6.19e-07	rs11989681	11345	GCST90274813	Interleukin-4 levels	TRUE	reported
8	22650727	A	T	-0.0676	0.0136	0.387	6.68e-07	rs10113106	11345	GCST90274813	Interleukin-4 levels	TRUE	reported
8	22650741	T	C	0.0675	0.0136	0.6126	6.93e-07	rs10113109	11345	GCST90274813	Interleukin-4 levels	TRUE	reported
8	22651003	A	G	0.067	0.0136	0.6119	8.37e-07	rs12545388	11345	GCST90274813	Interleukin-4 levels	TRUE	reported
8	22653318	T	G	0.0638	0.0136	0.6088	2.72e-06	rs4871835	11345	GCST90274813	Interleukin-4 levels	TRUE	reported
8	22653377	T	C	0.0621	0.0136	0.6106	4.97e-06	rs4871836	11345	GCST90274813	Interleukin-4 levels	TRUE	reported
8	22661860	T	G	0.0617	0.0135	0.5969	4.87e-06	rs953561	11344	GCST90274813	Interleukin-4 levels	TRUE	reported
8	119262693	T	C	0.136	0.0297	0.0552	4.67e-06	rs4876406	11792	GCST90274813	Interleukin-4 levels	TRUE	reported
8	119274249	T	G	-0.1391	0.0299	0.9451	3.28e-06	rs4876407	11788	GCST90274813	Interleukin-4 levels	TRUE	reported
9	117036047	T	G	-0.1338	0.0278	0.0752	1.49e-06	rs1490743	10281	GCST90274813	Interleukin-4 levels	TRUE	reported
9	140395079	A	G	-0.6128	0.1301	0.0067	2.47e-06	rs553835760	6780	GCST90274813	Interleukin-4 levels	TRUE	reported
10	6800809	T	C	-0.2354	0.045	0.0253	1.68e-07	rs75610895	11787	GCST90274813	Interleukin-4 levels	TRUE	reported
10	34284406	A	G	0.2805	0.0592	0.9846	2.16e-06	rs116963481	11793	GCST90274813	Interleukin-4 levels	TRUE	reported
10	34286635	T	C	-0.277	0.0602	0.0152	4.2e-06	rs185379336	11793	GCST90274813	Interleukin-4 levels	TRUE	reported
11	33398760	A	G	-0.8152	0.165	0.9959	7.79e-07	rs182428359	6941	GCST90274813	Interleukin-4 levels	TRUE	reported
14	106921396	T	C	-0.1128	0.0244	0.7641	3.78e-06	rs7150107	8099	GCST90274813	Interleukin-4 levels	TRUE	reported
15	79066932	A	G	0.0716	0.0152	0.4842	2.47e-06	rs12900168	10471	GCST90274813	Interleukin-4 levels	TRUE	reported
16	6867533	T	TAA	0.0796	0.0165	0.4054	1.41e-06	rs144600488	7942	GCST90274813	Interleukin-4 levels	TRUE	reported
18	57406643	T	G	0.667	0.1366	0.0063	1.05e-06	rs146951784	6304	GCST90274813	Interleukin-4 levels	TRUE	reported
1	240843947	C	G	-0.0928	0.0187	0.8143	6.96e-07	rs7550374	11345	GCST90274845	Thymic stromal lymphopoietin levels	TRUE	reported
1	240844395	T	C	-0.0982	0.0208	0.8564	2.35e-06	rs10158094	11345	GCST90274845	Thymic stromal lymphopoietin levels	TRUE	reported
1	245104855	CAA	C	-0.1811	0.0394	0.0489	4.3e-06	rs556581186	7943	GCST90274845	Thymic stromal lymphopoietin levels	TRUE	reported
2	2624754	T	C	0.07	0.015	0.2549	3.06e-06	rs12475114	11771	GCST90274845	Thymic stromal lymphopoietin levels	TRUE	reported
2	2625595	T	C	-0.0717	0.0154	0.7502	3.23e-06	rs2385305	11345	GCST90274845	Thymic stromal lymphopoietin levels	TRUE	reported
2	2625718	T	C	-0.0714	0.0152	0.7563	2.64e-06	rs2100268	11783	GCST90274845	Thymic stromal lymphopoietin levels	TRUE	reported
2	2626393	A	G	-0.0715	0.0152	0.7563	2.55e-06	rs11673823	11789	GCST90274845	Thymic stromal lymphopoietin levels	TRUE	reported
2	2626800	A	G	-0.0715	0.0152	0.7559	2.55e-06	rs2385306	11793	GCST90274845	Thymic stromal lymphopoietin levels	TRUE	reported
2	2626966	C	G	-0.074	0.0153	0.758	1.32e-06	rs12472785	11792	GCST90274845	Thymic stromal lymphopoietin levels	TRUE	reported
2	2626967	T	C	0.073	0.0152	0.2424	1.57e-06	rs12472784	11792	GCST90274845	Thymic stromal lymphopoietin levels	TRUE	reported
2	2627644	A	G	0.0714	0.0153	0.2392	3.06e-06	rs7566986	11784	GCST90274845	Thymic stromal lymphopoietin levels	TRUE	reported
2	112495165	A	C	-0.6415	0.1405	0.0104	4.98e-06	rs576364215	6834	GCST90274845	Thymic stromal lymphopoietin levels	TRUE	reported
2	228654997	A	G	-0.6522	0.1426	0.0074	4.79e-06	rs187874057	8718	GCST90274845	Thymic stromal lymphopoietin levels	TRUE	reported
2	239484610	T	C	-0.0834	0.0178	0.4567	2.79e-06	rs13414099	7943	GCST90274845	Thymic stromal lymphopoietin levels	TRUE	reported
3	72402332	A	G	-0.6708	0.1436	0.9948	2.99e-06	rs75422290	6862	GCST90274845	Thymic stromal lymphopoietin levels	TRUE	reported
4	148576480	T	C	-0.5822	0.124	0.9936	2.66e-06	rs558747031	6862	GCST90274845	Thymic stromal lymphopoietin levels	TRUE	reported
4	178925582	C	G	0.5703	0.1235	0.9919	3.88e-06	rs190516038	8488	GCST90274845	Thymic stromal lymphopoietin levels	TRUE	reported
5	143607504	C	G	0.9266	0.1869	0.0043	7.13e-07	rs186322282	6780	GCST90274845	Thymic stromal lymphopoietin levels	TRUE	reported
6	68372837	A	G	0.9288	0.196	0.0022	2.15e-06	rs543392754	7654	GCST90274845	Thymic stromal lymphopoietin levels	TRUE	reported
6	68664554	A	G	-0.8551	0.185	0.9976	3.8e-06	rs529716986	8718	GCST90274845	Thymic stromal lymphopoietin levels	TRUE	reported
7	42662187	A	G	0.0782	0.0148	0.3006	1.27e-07	rs17172094	11344	GCST90274845	Thymic stromal lymphopoietin levels	TRUE	reported
7	42667876	A	C	-0.0663	0.0142	0.6941	3.03e-06	rs1568799	11791	GCST90274845	Thymic stromal lymphopoietin levels	TRUE	reported
7	42671386	A	G	-0.0691	0.0145	0.7127	1.88e-06	rs13222816	11793	GCST90274845	Thymic stromal lymphopoietin levels	TRUE	reported
7	42674506	A	G	0.0694	0.0145	0.2879	1.7e-06	rs35120307	11793	GCST90274845	Thymic stromal lymphopoietin levels	TRUE	reported
7	42677741	A	C	-0.0687	0.0145	0.7114	2.16e-06	rs62444189	11793	GCST90274845	Thymic stromal lymphopoietin levels	TRUE	reported
7	42677764	A	T	-0.069	0.0145	0.7126	1.95e-06	rs79562994	11793	GCST90274845	Thymic stromal lymphopoietin levels	TRUE	reported
7	42678297	T	C	-0.0685	0.0144	0.711	1.97e-06	rs35158772	11793	GCST90274845	Thymic stromal lymphopoietin levels	TRUE	reported
7	42680031	T	C	0.071	0.0144	0.288	8.2e-07	rs11771041	11793	GCST90274845	Thymic stromal lymphopoietin levels	TRUE	reported
7	42681004	A	G	-0.0684	0.0144	0.7112	2.03e-06	rs35270213	11792	GCST90274845	Thymic stromal lymphopoietin levels	TRUE	reported
7	42681505	T	C	0.0693	0.0144	0.2883	1.49e-06	rs56125752	11793	GCST90274845	Thymic stromal lymphopoietin levels	TRUE	reported
7	42682878	A	C	-0.0697	0.0144	0.7122	1.3e-06	rs1156606	11793	GCST90274845	Thymic stromal lymphopoietin levels	TRUE	reported
7	42682970	T	C	0.0701	0.0144	0.288	1.13e-06	rs1156607	11793	GCST90274845	Thymic stromal lymphopoietin levels	TRUE	reported
7	42687837	A	T	-0.0656	0.0142	0.7	3.84e-06	rs1546357	11788	GCST90274845	Thymic stromal lymphopoietin levels	TRUE	reported
7	42692711	T	C	-0.0689	0.0143	0.7111	1.45e-06	rs13223303	11789	GCST90274845	Thymic stromal lymphopoietin levels	TRUE	reported
7	42692906	T	C	-0.0702	0.0143	0.7118	9.15e-07	rs1504840	11791	GCST90274845	Thymic stromal lymphopoietin levels	TRUE	reported
7	42694779	A	T	0.0761	0.0154	0.2885	7.75e-07	rs12537626	10295	GCST90274845	Thymic stromal lymphopoietin levels	TRUE	reported
7	42696969	T	C	0.0724	0.0144	0.2833	4.96e-07	rs11768597	11790	GCST90274845	Thymic stromal lymphopoietin levels	TRUE	reported
7	42699012	T	C	0.0692	0.0142	0.2966	1.1e-06	rs2330628	11787	GCST90274845	Thymic stromal lymphopoietin levels	TRUE	reported
7	42699121	T	C	-0.0723	0.0144	0.7151	5.14e-07	rs2330629	11788	GCST90274845	Thymic stromal lymphopoietin levels	TRUE	reported
7	42700175	A	G	0.0703	0.0142	0.2966	7.39e-07	rs13245935	11786	GCST90274845	Thymic stromal lymphopoietin levels	TRUE	reported
7	42700532	T	C	-0.0694	0.0142	0.7036	1.02e-06	rs7778217	11787	GCST90274845	Thymic stromal lymphopoietin levels	TRUE	reported
7	42700901	A	G	-0.0743	0.0144	0.7155	2.47e-07	rs7799157	11788	GCST90274845	Thymic stromal lymphopoietin levels	TRUE	reported
7	42701627	T	C	0.0654	0.014	0.3137	2.99e-06	rs13223034	11788	GCST90274845	Thymic stromal lymphopoietin levels	TRUE	reported
7	42702223	T	C	-0.0643	0.014	0.6854	4.37e-06	rs12673352	11788	GCST90274845	Thymic stromal lymphopoietin levels	TRUE	reported
7	42704271	A	G	-0.0692	0.0142	0.7034	1.1e-06	rs3913703	11786	GCST90274845	Thymic stromal lymphopoietin levels	TRUE	reported
7	42707211	T	C	0.0652	0.014	0.314	3.21e-06	rs1857759	11788	GCST90274845	Thymic stromal lymphopoietin levels	TRUE	reported
7	42707712	T	C	-0.0718	0.0144	0.7161	6.16e-07	rs10951692	11790	GCST90274845	Thymic stromal lymphopoietin levels	TRUE	reported
7	42710749	A	T	-0.0738	0.0144	0.7144	2.98e-07	rs34092536	11788	GCST90274845	Thymic stromal lymphopoietin levels	TRUE	reported
7	42712650	A	G	0.0731	0.0144	0.2844	3.85e-07	rs1504841	11788	GCST90274845	Thymic stromal lymphopoietin levels	TRUE	reported
7	42716685	A	G	0.0722	0.0144	0.2849	5.33e-07	rs16880664	11789	GCST90274845	Thymic stromal lymphopoietin levels	TRUE	reported
7	42718109	C	G	0.0719	0.0144	0.2841	5.94e-07	rs4342494	11790	GCST90274845	Thymic stromal lymphopoietin levels	TRUE	reported
7	42719069	T	C	-0.0653	0.014	0.6863	3.1e-06	rs726150	11788	GCST90274845	Thymic stromal lymphopoietin levels	TRUE	reported
7	42720079	T	C	0.0651	0.014	0.3141	3.32e-06	rs62457837	11788	GCST90274845	Thymic stromal lymphopoietin levels	TRUE	reported
7	42722489	A	G	0.0723	0.0144	0.2847	5.14e-07	rs724823	11790	GCST90274845	Thymic stromal lymphopoietin levels	TRUE	reported
7	42723953	A	T	0.07	0.0143	0.2963	9.83e-07	rs10499630	11787	GCST90274845	Thymic stromal lymphopoietin levels	TRUE	reported
7	42726618	A	G	-0.0752	0.0147	0.7157	3.13e-07	rs10499631	11345	GCST90274845	Thymic stromal lymphopoietin levels	TRUE	reported
7	42726932	A	T	-0.0722	0.0145	0.7041	6.38e-07	rs17151012	11345	GCST90274845	Thymic stromal lymphopoietin levels	TRUE	reported
7	42728245	T	C	0.0757	0.0147	0.2835	2.61e-07	rs4720432	11344	GCST90274845	Thymic stromal lymphopoietin levels	TRUE	reported
7	42729599	A	T	-0.0752	0.0148	0.7171	3.75e-07	rs4720433	11345	GCST90274845	Thymic stromal lymphopoietin levels	TRUE	reported
7	42729855	A	G	0.0752	0.0147	0.2883	3.13e-07	rs4724125	11345	GCST90274845	Thymic stromal lymphopoietin levels	TRUE	reported
7	42730058	T	G	0.0846	0.0152	0.2624	2.61e-08	rs4724126	11344	GCST90274845	Thymic stromal lymphopoietin levels	TRUE	reported
7	42730570	T	C	-0.0683	0.0143	0.6824	1.79e-06	rs2330632	11345	GCST90274845	Thymic stromal lymphopoietin levels	TRUE	reported
7	42732612	T	G	-0.0712	0.0144	0.693	7.64e-07	rs7797942	11345	GCST90274845	Thymic stromal lymphopoietin levels	TRUE	reported
7	42732637	A	G	0.0751	0.0147	0.2882	3.24e-07	rs13234260	11345	GCST90274845	Thymic stromal lymphopoietin levels	TRUE	reported
7	42732827	A	G	0.0707	0.0145	0.306	1.08e-06	rs13234512	11345	GCST90274845	Thymic stromal lymphopoietin levels	TRUE	reported
7	42732842	T	G	0.0748	0.0147	0.288	3.61e-07	rs13234515	11345	GCST90274845	Thymic stromal lymphopoietin levels	TRUE	reported
7	42732860	A	C	-0.0714	0.0145	0.6939	8.47e-07	rs13234211	11345	GCST90274845	Thymic stromal lymphopoietin levels	TRUE	reported
7	148846775	A	T	0.0743	0.0158	0.632	2.57e-06	rs75129390	8817	GCST90274845	Thymic stromal lymphopoietin levels	TRUE	reported
8	69813968	A	G	0.1629	0.0345	0.9535	2.34e-06	rs72652144	11782	GCST90274845	Thymic stromal lymphopoietin levels	TRUE	reported
9	23277990	A	T	-0.0934	0.0201	0.1258	3.37e-06	rs112206094	11792	GCST90274845	Thymic stromal lymphopoietin levels	TRUE	reported
10	34395970	A	G	-0.1569	0.0338	0.0499	3.45e-06	rs117095006	11345	GCST90274845	Thymic stromal lymphopoietin levels	TRUE	reported
10	76536391	A	G	-0.6579	0.1406	0.0123	2.88e-06	rs538925026	7844	GCST90274845	Thymic stromal lymphopoietin levels	TRUE	reported
10	108726426	T	C	-0.2956	0.063	0.0141	2.7e-06	rs72811179	11345	GCST90274845	Thymic stromal lymphopoietin levels	TRUE	reported
11	22202919	T	TC	0.1187	0.0256	0.1055	3.54e-06	rs113806353	8377	GCST90274845	Thymic stromal lymphopoietin levels	TRUE	reported
11	69540917	A	G	-0.515	0.108	0.0218	1.86e-06	rs144378121	8460	GCST90274845	Thymic stromal lymphopoietin levels	TRUE	reported
11	121946210	A	G	0.2674	0.0575	0.9812	3.31e-06	rs145111430	11345	GCST90274845	Thymic stromal lymphopoietin levels	TRUE	reported
12	16217066	T	TTAATC	0.0837	0.0181	0.2697	3.76e-06	rs3086659	7943	GCST90274845	Thymic stromal lymphopoietin levels	TRUE	reported
12	120426826	T	C	1.0291	0.2179	0.0105	2.33e-06	rs79878785	5540	GCST90274845	Thymic stromal lymphopoietin levels	TRUE	reported
15	60209215	A	C	0.3219	0.066	0.0132	1.08e-06	rs190906347	10858	GCST90274845	Thymic stromal lymphopoietin levels	TRUE	reported
15	79915029	A	G	0.1619	0.0351	0.0381	3.98e-06	rs140886020	11786	GCST90274845	Thymic stromal lymphopoietin levels	TRUE	reported
15	79919814	T	C	0.1608	0.035	0.0381	4.34e-06	rs149892867	11786	GCST90274845	Thymic stromal lymphopoietin levels	TRUE	reported
16	8805947	T	G	0.1784	0.0367	0.0353	1.17e-06	rs12448125	11792	GCST90274845	Thymic stromal lymphopoietin levels	TRUE	reported
16	8808477	C	G	0.1651	0.0361	0.0366	4.8e-06	rs74008010	11790	GCST90274845	Thymic stromal lymphopoietin levels	TRUE	reported
17	27504563	A	G	-0.4423	0.0943	0.0096	2.73e-06	rs118119134	8576	GCST90274845	Thymic stromal lymphopoietin levels	TRUE	reported
17	80919387	A	G	-0.0643	0.0139	0.4553	3.73e-06	rs7406537	11149	GCST90274845	Thymic stromal lymphopoietin levels	TRUE	reported
20	4611607	T	C	-0.4461	0.093	0.0089	1.61e-06	rs141103179	9362	GCST90274845	Thymic stromal lymphopoietin levels	TRUE	reported
20	37959633	A	G	0.3618	0.0747	0.9877	1.28e-06	rs185922111	10858	GCST90274845	Thymic stromal lymphopoietin levels	TRUE	reported
20	61330928	A	G	0.1637	0.0358	0.9249	4.82e-06	rs114113312	9407	GCST90274845	Thymic stromal lymphopoietin levels	TRUE	reported
21	43019266	CAA	C	-0.0844	0.0165	0.3738	3.13e-07	rs10689338	7943	GCST90274845	Thymic stromal lymphopoietin levels	TRUE	reported
21	43022313	G	GT	-0.0784	0.0164	0.4048	1.75e-06	rs11336725	7942	GCST90274845	Thymic stromal lymphopoietin levels	TRUE	reported
22	47002274	T	C	0.1348	0.0294	0.8892	4.54e-06	rs577897343	7943	GCST90274845	Thymic stromal lymphopoietin levels	TRUE	reported
1	921716	A	C	-0.0664	0.0144	0.5539	4.01e-06	rs13303278	10265	GCST90274760	Artemin levels	TRUE	reported
1	17628383	T	G	0.0632	0.0137	0.6627	3.97e-06	rs3003450	11762	GCST90274760	Artemin levels	TRUE	reported
1	21802667	A	G	0.4282	0.0812	0.0149	1.34e-07	rs189746786	8481	GCST90274760	Artemin levels	TRUE	reported
1	225057589	A	C	-0.3226	0.0682	0.9882	2.24e-06	rs76672219	11291	GCST90274760	Artemin levels	TRUE	reported
2	112041032	A	G	0.3858	0.0843	0.0207	4.73e-06	rs529654120	8703	GCST90274760	Artemin levels	TRUE	reported
2	117094887	A	T	0.6308	0.1206	0.0053	1.69e-07	rs150721068	7837	GCST90274760	Artemin levels	TRUE	reported
2	217779462	A	G	-0.967	0.2078	0.0035	3.26e-06	rs548847286	7639	GCST90274760	Artemin levels	TRUE	reported
3	107807063	T	C	0.179	0.0385	0.9692	3.33e-06	rs73200305	11778	GCST90274760	Artemin levels	TRUE	reported
3	107814234	A	G	-0.1775	0.0384	0.0309	3.79e-06	rs62264068	11778	GCST90274760	Artemin levels	TRUE	reported
3	108109666	T	G	0.5495	0.1176	0.995	2.97e-06	rs187586162	9333	GCST90274760	Artemin levels	TRUE	reported
3	111692693	A	G	-0.0761	0.0166	0.8035	4.55e-06	rs2895388	11761	GCST90274760	Artemin levels	TRUE	reported
3	111693679	A	T	-0.0761	0.0166	0.8052	4.55e-06	rs3749300	11761	GCST90274760	Artemin levels	TRUE	reported
3	111693823	A	T	-0.0769	0.0167	0.8077	4.13e-06	rs3749303	11761	GCST90274760	Artemin levels	TRUE	reported
3	111694183	A	G	0.0792	0.0173	0.1831	4.69e-06	rs73852799	11761	GCST90274760	Artemin levels	TRUE	reported
3	111694355	A	G	-0.0767	0.0166	0.8066	3.83e-06	rs17428388	11761	GCST90274760	Artemin levels	TRUE	reported
3	111694782	A	G	0.0763	0.0166	0.1942	4.3e-06	rs6763390	11761	GCST90274760	Artemin levels	TRUE	reported
3	111695124	T	C	-0.0764	0.0166	0.8057	4.18e-06	rs3177104	11761	GCST90274760	Artemin levels	TRUE	reported
3	111695315	A	G	-0.0766	0.0166	0.8057	3.94e-06	rs3749305	11761	GCST90274760	Artemin levels	TRUE	reported
3	111695454	T	C	0.0764	0.0166	0.1943	4.18e-06	rs3749306	11761	GCST90274760	Artemin levels	TRUE	reported
3	111695504	A	T	-0.0764	0.0166	0.8057	4.18e-06	rs3749307	11761	GCST90274760	Artemin levels	TRUE	reported
3	111696768	T	C	-0.077	0.0166	0.8054	3.51e-06	rs9833906	11770	GCST90274760	Artemin levels	TRUE	reported
3	111696924	A	C	0.0775	0.0165	0.1946	2.64e-06	rs9817855	11770	GCST90274760	Artemin levels	TRUE	reported
3	111697131	A	G	0.0786	0.0166	0.1942	2.19e-06	rs9818467	11770	GCST90274760	Artemin levels	TRUE	reported
3	111697174	A	C	-0.0786	0.0166	0.8058	2.19e-06	rs9855924	11770	GCST90274760	Artemin levels	TRUE	reported
3	111697442	A	G	-0.0777	0.0165	0.8053	2.49e-06	rs9856271	11770	GCST90274760	Artemin levels	TRUE	reported
3	111697607	A	G	0.078	0.0166	0.1945	2.62e-06	rs9288932	11770	GCST90274760	Artemin levels	TRUE	reported
3	111697741	C	G	0.0772	0.0166	0.1944	3.31e-06	rs812149	11768	GCST90274760	Artemin levels	TRUE	reported
3	111697867	T	C	-0.0775	0.0166	0.8056	3.03e-06	rs2289598	11770	GCST90274760	Artemin levels	TRUE	reported
3	111719879	T	C	0.0824	0.0165	0.198	5.92e-07	rs2292582	11776	GCST90274760	Artemin levels	TRUE	reported
3	111720183	A	G	0.0833	0.0166	0.1972	5.22e-07	rs62277657	11777	GCST90274760	Artemin levels	TRUE	reported
3	111720680	T	G	0.0826	0.0166	0.1975	6.49e-07	rs1372972	11776	GCST90274760	Artemin levels	TRUE	reported
3	111720876	A	C	0.0826	0.0166	0.1972	6.49e-07	rs62277658	11777	GCST90274760	Artemin levels	TRUE	reported
3	111720948	A	C	-0.0827	0.0166	0.803	6.3e-07	rs62277659	11777	GCST90274760	Artemin levels	TRUE	reported
3	111721021	A	C	0.0818	0.0166	0.1974	8.32e-07	rs62280160	11778	GCST90274760	Artemin levels	TRUE	reported
3	111721092	T	C	-0.0737	0.0155	0.7684	1.99e-06	rs11929538	11776	GCST90274760	Artemin levels	TRUE	reported
3	111721782	T	C	-0.0715	0.0154	0.7659	3.44e-06	rs774762	11778	GCST90274760	Artemin levels	TRUE	reported
3	111721929	A	G	0.0721	0.0155	0.2323	3.29e-06	rs774760	11777	GCST90274760	Artemin levels	TRUE	reported
3	111722092	T	C	0.0707	0.0154	0.2335	4.41e-06	rs774759	11778	GCST90274760	Artemin levels	TRUE	reported
3	111722196	A	G	0.0732	0.0155	0.2312	2.33e-06	rs774758	11777	GCST90274760	Artemin levels	TRUE	reported
4	4424044	A	G	-0.0811	0.0176	0.84	4.07e-06	rs138311590	11758	GCST90274760	Artemin levels	TRUE	reported
4	53367348	A	G	0.7211	0.1571	0.9963	4.43e-06	rs192833465	6939	GCST90274760	Artemin levels	TRUE	reported
4	53509947	T	C	-0.7472	0.1578	0.0037	2.19e-06	rs187769320	6939	GCST90274760	Artemin levels	TRUE	reported
4	156930775	C	G	0.0692	0.014	0.626	7.7e-07	rs9684768	11330	GCST90274760	Artemin levels	TRUE	reported
5	25911467	A	G	0.8364	0.175	0.9971	1.76e-06	rs529048184	6858	GCST90274760	Artemin levels	TRUE	reported
5	84772073	T	C	-0.7316	0.1587	0.996	4.03e-06	rs553235314	7837	GCST90274760	Artemin levels	TRUE	reported
5	103466564	A	G	-0.0873	0.0189	0.8494	3.86e-06	rs17340161	11330	GCST90274760	Artemin levels	TRUE	reported
5	103926658	G	GGCAGAGGTT	0.1299	0.0283	0.116	4.43e-06	rs111703468	7943	GCST90274760	Artemin levels	TRUE	reported
6	120060853	T	C	-0.7002	0.1472	0.9957	1.97e-06	rs184939510	7837	GCST90274760	Artemin levels	TRUE	reported
6	143047898	T	C	0.0853	0.0181	0.1545	2.44e-06	rs9496445	11768	GCST90274760	Artemin levels	TRUE	reported
7	106961661	A	G	0.311	0.0639	0.0191	1.13e-06	rs142970662	9834	GCST90274760	Artemin levels	TRUE	reported
8	3686552	A	T	-0.079	0.0162	0.6759	1.08e-06	rs4993886	8371	GCST90274760	Artemin levels	TRUE	reported
8	3686553	A	T	-0.0771	0.0162	0.677	1.94e-06	rs4993887	8371	GCST90274760	Artemin levels	TRUE	reported
8	19493177	A	G	-0.2047	0.044	0.0245	3.28e-06	rs55885546	11778	GCST90274760	Artemin levels	TRUE	reported
9	92205987	T	C	-0.0666	0.0136	0.5081	9.73e-07	rs1888072	11330	GCST90274760	Artemin levels	TRUE	reported
9	92207308	A	G	-0.062	0.0135	0.5096	4.38e-06	rs7357754	11329	GCST90274760	Artemin levels	TRUE	reported
9	92208227	A	G	-0.0674	0.0136	0.5323	7.2e-07	rs1329733	11330	GCST90274760	Artemin levels	TRUE	reported
9	92209151	C	G	0.0672	0.0136	0.4677	7.77e-07	rs12335914	11330	GCST90274760	Artemin levels	TRUE	reported
9	92209279	A	G	0.0643	0.0135	0.4871	1.91e-06	rs6559365	11329	GCST90274760	Artemin levels	TRUE	reported
9	92212610	A	T	0.0636	0.0135	0.4882	2.46e-06	rs1475535	11330	GCST90274760	Artemin levels	TRUE	reported
9	92212674	T	C	-0.0629	0.0135	0.5114	3.17e-06	rs1475536	11330	GCST90274760	Artemin levels	TRUE	reported
9	140239588	T	C	0.2119	0.0435	0.038	1.11e-06	rs142585779	10266	GCST90274760	Artemin levels	TRUE	reported
10	52447591	T	C	0.0874	0.0186	0.8262	2.62e-06	rs117212234	11330	GCST90274760	Artemin levels	TRUE	reported
10	52449020	T	C	-0.0852	0.0185	0.1749	4.12e-06	rs3001873	11330	GCST90274760	Artemin levels	TRUE	reported
10	58297440	T	C	-0.5274	0.1122	0.0061	2.59e-06	rs145399195	8368	GCST90274760	Artemin levels	TRUE	reported
10	113519406	C	G	-0.6681	0.1422	0.0034	2.62e-06	rs148056225	8703	GCST90274760	Artemin levels	TRUE	reported
10	113587018	T	G	0.6677	0.1435	0.9965	3.27e-06	rs147311284	8703	GCST90274760	Artemin levels	TRUE	reported
10	113768901	T	C	-0.8247	0.1802	0.0027	4.73e-06	rs188183717	7724	GCST90274760	Artemin levels	TRUE	reported
11	43258257	T	C	-0.3979	0.0828	0.9917	1.54e-06	rs144163385	10843	GCST90274760	Artemin levels	TRUE	reported
11	56716579	A	T	0.2969	0.0609	0.9852	1.09e-06	rs144988429	10843	GCST90274760	Artemin levels	TRUE	reported
11	56727202	T	C	0.2965	0.0608	0.9851	1.08e-06	rs151244558	10843	GCST90274760	Artemin levels	TRUE	reported
11	56743397	A	T	0.3628	0.0691	0.9847	1.52e-07	rs142125220	8283	GCST90274760	Artemin levels	TRUE	reported
11	112934470	T	G	-0.2687	0.0588	0.028	4.88e-06	rs569463048	7943	GCST90274760	Artemin levels	TRUE	reported
11	123394636	C	G	0.0679	0.0141	0.318	1.47e-06	rs77502336	11775	GCST90274760	Artemin levels	TRUE	reported
11	123395987	T	C	0.0667	0.0146	0.3184	4.91e-06	rs7927437	11330	GCST90274760	Artemin levels	TRUE	reported
12	81724190	T	C	0.1703	0.0362	0.0344	2.55e-06	rs118115625	11778	GCST90274760	Artemin levels	TRUE	reported
12	130004146	A	G	0.2112	0.0451	0.9758	2.83e-06	rs148226005	11765	GCST90274760	Artemin levels	TRUE	reported
13	115079047	A	G	-1.0232	0.2195	0.0028	3.14e-06	rs143754953	6604	GCST90274760	Artemin levels	TRUE	reported
17	15319167	T	C	0.5609	0.1217	0.9945	4.05e-06	rs180694336	8481	GCST90274760	Artemin levels	TRUE	reported
18	54687813	A	G	0.0694	0.0152	0.2597	4.98e-06	rs2278495	11330	GCST90274760	Artemin levels	TRUE	reported
18	54688939	T	C	-0.07	0.0153	0.7417	4.76e-06	rs1370215	11330	GCST90274760	Artemin levels	TRUE	reported
19	49540865	C	G	-0.429	0.0926	0.0088	3.61e-06	rs184082936	9368	GCST90274760	Artemin levels	TRUE	reported
19	55419841	A	G	-0.0862	0.0181	0.7767	1.91e-06	rs113104038	9453	GCST90274760	Artemin levels	TRUE	reported
19	55420234	T	G	-0.085	0.0178	0.8139	1.79e-06	rs8111853	11330	GCST90274760	Artemin levels	TRUE	reported
19	55420360	T	TA	-0.1065	0.0223	0.7959	1.79e-06	rs57278586	7943	GCST90274760	Artemin levels	TRUE	reported
19	55420801	A	C	0.083	0.0166	0.2281	5.73e-07	rs3765013	11330	GCST90274760	Artemin levels	TRUE	reported
19	55420924	C	G	-0.0883	0.0178	0.8155	7.02e-07	rs3765014	11330	GCST90274760	Artemin levels	TRUE	reported
19	55422034	C	G	-0.0881	0.0176	0.8122	5.57e-07	rs6509909	11330	GCST90274760	Artemin levels	TRUE	reported
19	55422484	A	G	0.0828	0.0176	0.199	2.54e-06	rs8112412	11330	GCST90274760	Artemin levels	TRUE	reported
19	55422600	A	G	-0.0822	0.0177	0.801	3.42e-06	rs8112255	11330	GCST90274760	Artemin levels	TRUE	reported
19	55423488	T	C	-0.0874	0.0182	0.8382	1.57e-06	rs73619967	11776	GCST90274760	Artemin levels	TRUE	reported
19	55423530	T	C	0.0886	0.0189	0.1503	2.76e-06	rs73619969	11769	GCST90274760	Artemin levels	TRUE	reported
22	25646493	T	C	0.0765	0.0167	0.7151	4.63e-06	rs9941952	11774	GCST90274760	Artemin levels	TRUE	reported
22	26178581	A	G	-0.9015	0.1835	0.0031	8.98e-07	rs12158659	6858	GCST90274760	Artemin levels	TRUE	reported
2	74054272	T	C	-0.2093	0.0414	0.9761	4.29e-07	rs17009396	14249	GCST90274837	STAM binding protein levels	TRUE	reported
2	74057096	A	T	0.2033	0.0414	0.0238	9.08e-07	rs56665235	14249	GCST90274837	STAM binding protein levels	TRUE	reported
2	74057995	T	C	-0.2064	0.0417	0.9763	7.44e-07	rs919629	14249	GCST90274837	STAM binding protein levels	TRUE	reported
2	74058514	T	C	0.2033	0.0425	0.0225	1.72e-06	rs75060133	14248	GCST90274837	STAM binding protein levels	TRUE	reported
2	74061232	A	G	0.2195	0.0425	0.0229	2.41e-07	rs111872246	14248	GCST90274837	STAM binding protein levels	TRUE	reported
2	74066011	C	G	-0.1974	0.0411	0.9758	1.56e-06	rs12618950	14249	GCST90274837	STAM binding protein levels	TRUE	reported
2	74070685	T	C	0.2013	0.0433	0.0225	3.34e-06	rs12623504	14248	GCST90274837	STAM binding protein levels	TRUE	reported
2	74070843	T	C	-0.2132	0.0422	0.9771	4.37e-07	rs7609273	14735	GCST90274837	STAM binding protein levels	TRUE	reported
2	74071046	T	C	-0.2063	0.0426	0.9774	1.28e-06	rs12614068	14248	GCST90274837	STAM binding protein levels	TRUE	reported
2	74073106	A	G	-0.2074	0.0418	0.9769	6.99e-07	rs58787134	14248	GCST90274837	STAM binding protein levels	TRUE	reported
2	74080373	A	T	-0.1979	0.0412	0.9756	1.56e-06	rs13012471	14247	GCST90274837	STAM binding protein levels	TRUE	reported
2	74084359	T	C	0.199	0.0414	0.0243	1.53e-06	rs17009404	14247	GCST90274837	STAM binding protein levels	TRUE	reported
2	74085154	C	G	0.2002	0.0422	0.0232	2.09e-06	rs7592693	14248	GCST90274837	STAM binding protein levels	TRUE	reported
2	122731427	A	G	0.1085	0.0218	0.9138	6.46e-07	rs138897138	14288	GCST90274837	STAM binding protein levels	TRUE	reported
2	122782632	A	G	-0.1083	0.0237	0.0706	4.89e-06	rs17779654	14288	GCST90274837	STAM binding protein levels	TRUE	reported
3	9864453	A	G	-1.1414	0.2494	0.9981	4.73e-06	rs527964650	6826	GCST90274837	STAM binding protein levels	TRUE	reported
3	14613224	T	C	-0.1484	0.0325	0.9619	4.97e-06	rs116198125	14727	GCST90274837	STAM binding protein levels	TRUE	reported
4	88786453	T	G	-0.5672	0.1215	0.0057	3.04e-06	rs145991374	8188	GCST90274837	STAM binding protein levels	TRUE	reported
4	88824152	A	G	-0.5077	0.1084	0.0061	2.82e-06	rs186559584	9684	GCST90274837	STAM binding protein levels	TRUE	reported
4	131231273	A	G	0.6496	0.1408	0.0067	3.96e-06	rs185825146	7080	GCST90274837	STAM binding protein levels	TRUE	reported
4	131361673	T	G	-0.9313	0.1771	0.9959	1.45e-07	rs138790688	7080	GCST90274837	STAM binding protein levels	TRUE	reported
4	131362266	T	C	-1.0113	0.2203	0.9979	4.42e-06	rs548856358	6780	GCST90274837	STAM binding protein levels	TRUE	reported
5	6324187	A	G	0.5045	0.1052	0.9948	1.62e-06	rs181015183	11661	GCST90274837	STAM binding protein levels	TRUE	reported
5	22146150	CA	C	0.0651	0.0142	0.5629	4.55e-06	rs33976176	10894	GCST90274837	STAM binding protein levels	TRUE	reported
6	27175296	T	C	-0.344	0.0708	0.0101	1.18e-06	rs7766328	10795	GCST90274837	STAM binding protein levels	TRUE	reported
6	158193698	A	G	0.0695	0.0145	0.698	1.64e-06	rs1034059	14288	GCST90274837	STAM binding protein levels	TRUE	reported
7	14143486	C	G	-0.1251	0.0243	0.9177	2.63e-07	rs12531843	12404	GCST90274837	STAM binding protein levels	TRUE	reported
7	29807677	T	G	0.1578	0.0339	0.0643	3.24e-06	rs200824954	10894	GCST90274837	STAM binding protein levels	TRUE	reported
7	55835811	A	G	-0.9061	0.1951	0.9976	3.41e-06	rs183638423	6862	GCST90274837	STAM binding protein levels	TRUE	reported
8	77288144	A	C	-0.4532	0.0955	0.9931	2.08e-06	rs192136793	10206	GCST90274837	STAM binding protein levels	TRUE	reported
8	93505088	A	T	-0.8364	0.1694	0.9966	7.92e-07	rs537487434	6780	GCST90274837	STAM binding protein levels	TRUE	reported
9	8986302	A	AT	-0.5963	0.123	0.0057	1.25e-06	rs368318085	8911	GCST90274837	STAM binding protein levels	TRUE	reported
9	20650618	A	G	0.5027	0.1092	0.9938	4.15e-06	rs191867113	7756	GCST90274837	STAM binding protein levels	TRUE	reported
9	20775139	A	G	-0.4272	0.0926	0.0065	3.96e-06	rs149145179	10850	GCST90274837	STAM binding protein levels	TRUE	reported
10	6800809	T	C	-0.1908	0.0394	0.0247	1.28e-06	rs75610895	14730	GCST90274837	STAM binding protein levels	TRUE	reported
10	106973313	T	C	0.4738	0.1031	0.99	4.32e-06	rs192286602	6222	GCST90274837	STAM binding protein levels	TRUE	reported
12	30469811	A	G	-0.9503	0.1957	0.0029	1.2e-06	rs192483999	6862	GCST90274837	STAM binding protein levels	TRUE	reported
14	51811766	T	C	-0.4923	0.1076	0.0076	4.76e-06	rs144760554	8710	GCST90274837	STAM binding protein levels	TRUE	reported
14	104363671	A	G	-0.1722	0.0352	0.0323	9.98e-07	rs111581172	14736	GCST90274837	STAM binding protein levels	TRUE	reported
14	104373729	T	G	-0.1682	0.0364	0.0307	3.82e-06	rs111454335	13868	GCST90274837	STAM binding protein levels	TRUE	reported
15	81221771	T	C	0.1387	0.0293	0.9524	2.2e-06	rs7171268	14288	GCST90274837	STAM binding protein levels	TRUE	reported
15	81222584	A	G	-0.178	0.0366	0.0292	1.15e-06	rs118064823	14713	GCST90274837	STAM binding protein levels	TRUE	reported
15	81227801	T	G	-0.1439	0.0309	0.0433	3.21e-06	rs11854045	14288	GCST90274837	STAM binding protein levels	TRUE	reported
15	81229434	T	C	-0.1657	0.0361	0.0315	4.43e-06	rs77336371	13801	GCST90274837	STAM binding protein levels	TRUE	reported
15	81232165	T	C	-0.1673	0.0355	0.0297	2.44e-06	rs79779522	14730	GCST90274837	STAM binding protein levels	TRUE	reported
15	81236947	T	C	-0.1655	0.0342	0.0314	1.3e-06	rs60391279	14731	GCST90274837	STAM binding protein levels	TRUE	reported
15	81240669	A	G	-0.1571	0.0309	0.0404	3.69e-07	rs2280441	14735	GCST90274837	STAM binding protein levels	TRUE	reported
15	81246028	A	G	-0.1293	0.0272	0.048	2e-06	rs1012541	14719	GCST90274837	STAM binding protein levels	TRUE	reported
15	81246092	A	T	0.1271	0.0271	0.9517	2.73e-06	rs1012540	14719	GCST90274837	STAM binding protein levels	TRUE	reported
15	81247455	T	C	-0.1306	0.0272	0.0481	1.58e-06	rs6495535	14722	GCST90274837	STAM binding protein levels	TRUE	reported
15	81250530	A	C	-0.1286	0.0279	0.0458	4.04e-06	rs28576249	14720	GCST90274837	STAM binding protein levels	TRUE	reported
15	81251672	T	C	-0.127	0.0277	0.0464	4.54e-06	rs28593334	14720	GCST90274837	STAM binding protein levels	TRUE	reported
15	81252261	T	C	0.1269	0.0277	0.9536	4.62e-06	rs117309418	14720	GCST90274837	STAM binding protein levels	TRUE	reported
15	81253609	A	G	-0.1268	0.0276	0.0466	4.34e-06	rs78278423	14720	GCST90274837	STAM binding protein levels	TRUE	reported
15	81256719	A	T	0.1268	0.0272	0.9518	3.14e-06	rs140037094	14722	GCST90274837	STAM binding protein levels	TRUE	reported
15	81257683	T	C	0.1316	0.0276	0.953	1.86e-06	rs141168705	14720	GCST90274837	STAM binding protein levels	TRUE	reported
15	81258750	A	G	0.1301	0.0274	0.9526	2.05e-06	rs74787527	14720	GCST90274837	STAM binding protein levels	TRUE	reported
15	81259491	C	G	-0.1295	0.0273	0.0475	2.1e-06	rs146305567	14726	GCST90274837	STAM binding protein levels	TRUE	reported
15	81260092	T	C	0.1303	0.0274	0.9526	1.98e-06	rs78138185	14726	GCST90274837	STAM binding protein levels	TRUE	reported
15	81260200	A	C	0.1302	0.0274	0.9526	2.02e-06	rs77519341	14726	GCST90274837	STAM binding protein levels	TRUE	reported
15	81260257	A	T	0.1312	0.0274	0.9526	1.68e-06	rs80042818	14726	GCST90274837	STAM binding protein levels	TRUE	reported
15	81261804	T	C	0.1282	0.0273	0.9523	2.65e-06	rs74843640	14726	GCST90274837	STAM binding protein levels	TRUE	reported
15	81262107	A	G	0.1276	0.0274	0.9525	3.21e-06	rs138846566	14726	GCST90274837	STAM binding protein levels	TRUE	reported
15	81262579	T	C	0.1268	0.0274	0.9527	3.7e-06	rs74734598	14727	GCST90274837	STAM binding protein levels	TRUE	reported
15	81263395	T	C	-0.1287	0.0274	0.0472	2.64e-06	rs79388415	14727	GCST90274837	STAM binding protein levels	TRUE	reported
15	81270754	T	C	0.1257	0.0271	0.9518	3.51e-06	rs8864	14736	GCST90274837	STAM binding protein levels	TRUE	reported
15	81270816	T	G	0.1281	0.0271	0.952	2.28e-06	rs12546	14736	GCST90274837	STAM binding protein levels	TRUE	reported
15	81272039	T	C	-0.1278	0.0266	0.0501	1.55e-06	rs73507450	14735	GCST90274837	STAM binding protein levels	TRUE	reported
15	81272193	A	G	-0.1238	0.0271	0.0482	4.92e-06	rs16972618	14734	GCST90274837	STAM binding protein levels	TRUE	reported
15	81272364	A	G	-0.1254	0.0271	0.0483	3.7e-06	rs76877681	14735	GCST90274837	STAM binding protein levels	TRUE	reported
15	81275169	C	G	0.1233	0.027	0.9515	4.96e-06	rs28562234	14735	GCST90274837	STAM binding protein levels	TRUE	reported
15	81275797	T	C	0.1267	0.0271	0.9519	2.94e-06	rs75759710	14736	GCST90274837	STAM binding protein levels	TRUE	reported
15	81277088	A	G	-0.1233	0.027	0.0486	4.96e-06	rs28441296	14735	GCST90274837	STAM binding protein levels	TRUE	reported
15	81282256	A	G	-0.1259	0.0273	0.0481	3.99e-06	rs11855135	14731	GCST90274837	STAM binding protein levels	TRUE	reported
15	81292145	A	G	-0.1259	0.0271	0.0487	3.39e-06	rs10162726	14731	GCST90274837	STAM binding protein levels	TRUE	reported
15	81292164	T	G	0.1263	0.0275	0.9526	4.37e-06	rs76692654	14729	GCST90274837	STAM binding protein levels	TRUE	reported
15	81297420	A	G	0.1269	0.027	0.9497	2.6e-06	rs16972633	14716	GCST90274837	STAM binding protein levels	TRUE	reported
15	81299749	T	C	-0.1261	0.0276	0.0474	4.9e-06	rs114730113	14719	GCST90274837	STAM binding protein levels	TRUE	reported
15	81301285	A	C	0.126	0.0273	0.9508	3.92e-06	rs73489720	14717	GCST90274837	STAM binding protein levels	TRUE	reported
15	81301409	A	G	-0.1265	0.0272	0.0496	3.31e-06	rs78940609	14716	GCST90274837	STAM binding protein levels	TRUE	reported
15	81307563	A	G	-0.1317	0.0273	0.0498	1.41e-06	rs7161935	14717	GCST90274837	STAM binding protein levels	TRUE	reported
15	81311138	T	C	-0.1262	0.0275	0.0491	4.45e-06	rs73489795	14718	GCST90274837	STAM binding protein levels	TRUE	reported
15	81311246	A	G	-0.1296	0.0275	0.0493	2.44e-06	rs73489798	14715	GCST90274837	STAM binding protein levels	TRUE	reported
15	81313001	A	G	0.1269	0.0273	0.9499	3.35e-06	rs16972652	14717	GCST90274837	STAM binding protein levels	TRUE	reported
15	81313195	A	G	0.1303	0.0275	0.9505	2.16e-06	rs11858049	14715	GCST90274837	STAM binding protein levels	TRUE	reported
16	84586319	T	C	0.0876	0.0169	0.3579	2.18e-07	rs114302245	10894	GCST90274837	STAM binding protein levels	TRUE	reported
17	60294757	A	G	0.235	0.0512	0.0269	4.44e-06	rs73327656	13801	GCST90274837	STAM binding protein levels	TRUE	reported
19	6195636	A	G	0.1288	0.0272	0.0724	2.19e-06	rs140656901	13224	GCST90274837	STAM binding protein levels	TRUE	reported
19	56709656	A	G	0.2031	0.0437	0.0246	3.36e-06	rs10426867	12785	GCST90274837	STAM binding protein levels	TRUE	reported
19	56715830	T	G	0.1905	0.041	0.0282	3.38e-06	rs181501166	12849	GCST90274837	STAM binding protein levels	TRUE	reported
19	56716145	A	T	0.1883	0.0409	0.0283	4.15e-06	rs138421109	12849	GCST90274837	STAM binding protein levels	TRUE	reported
20	12036644	G	GT	-0.2136	0.0457	0.0345	2.95e-06	rs35322783	10894	GCST90274837	STAM binding protein levels	TRUE	reported
22	45002809	A	G	0.0961	0.0208	0.8851	3.83e-06	rs12152184	12402	GCST90274837	STAM binding protein levels	TRUE	reported
1	7451498	A	G	-0.4507	0.0968	0.0095	3.22e-06	rs115252936	8100	GCST90274839	Tumor necrosis factor levels	TRUE	reported
1	19974157	A	G	1.38	0.2943	0.0015	2.74e-06	rs112044925	6862	GCST90274839	Tumor necrosis factor levels	TRUE	reported
1	22899008	T	G	-0.4392	0.0948	0.0262	3.61e-06	rs192134450	6826	GCST90274839	Tumor necrosis factor levels	TRUE	reported
1	161709503	CT	C	0.0953	0.0198	0.211	1.49e-06	rs35626520	7942	GCST90274839	Tumor necrosis factor levels	TRUE	reported
1	224236475	CA	C	0.0844	0.0175	0.3535	1.42e-06	rs574008110	7943	GCST90274839	Tumor necrosis factor levels	TRUE	reported
2	86202272	G	GATCCCA	0.0746	0.0161	0.4428	3.59e-06	rs70953974	7943	GCST90274839	Tumor necrosis factor levels	TRUE	reported
2	86297826	CCG	C	0.0818	0.0161	0.481	3.76e-07	rs113852190	7943	GCST90274839	Tumor necrosis factor levels	TRUE	reported
2	86307128	A	G	-0.0649	0.013	0.478	5.97e-07	rs12328100	11784	GCST90274839	Tumor necrosis factor levels	TRUE	reported
2	86378043	A	ATT	-0.07	0.0152	0.5079	4.12e-06	rs35901635	8389	GCST90274839	Tumor necrosis factor levels	TRUE	reported
2	86398985	A	ATTTT	0.0717	0.0152	0.4996	2.39e-06	rs10659146	8384	GCST90274839	Tumor necrosis factor levels	TRUE	reported
2	86429731	CTTAT	C	-0.0691	0.0151	0.5024	4.74e-06	rs111706137	8388	GCST90274839	Tumor necrosis factor levels	TRUE	reported
2	86432538	G	GCT	-0.0694	0.0151	0.5023	4.31e-06	rs34552877	8390	GCST90274839	Tumor necrosis factor levels	TRUE	reported
2	117952874	A	G	0.1177	0.0252	0.917	3e-06	rs333866	11337	GCST90274839	Tumor necrosis factor levels	TRUE	reported
2	117953084	A	T	0.1223	0.0254	0.9185	1.47e-06	rs333865	11337	GCST90274839	Tumor necrosis factor levels	TRUE	reported
2	117953560	T	G	0.1354	0.0271	0.9125	5.84e-07	rs440309	9453	GCST90274839	Tumor necrosis factor levels	TRUE	reported
2	117971552	A	T	-0.1105	0.0241	0.0904	4.54e-06	rs333850	11337	GCST90274839	Tumor necrosis factor levels	TRUE	reported
2	117991812	A	T	0.1289	0.0254	0.9163	3.88e-07	rs333835	11337	GCST90274839	Tumor necrosis factor levels	TRUE	reported
2	117991861	T	C	-0.1147	0.0242	0.0929	2.14e-06	rs333834	11337	GCST90274839	Tumor necrosis factor levels	TRUE	reported
2	118327465	A	C	-0.3419	0.0703	0.0125	1.15e-06	rs111339624	11337	GCST90274839	Tumor necrosis factor levels	TRUE	reported
3	108099780	T	C	0.0674	0.0135	0.4514	5.96e-07	rs7621032	11337	GCST90274839	Tumor necrosis factor levels	TRUE	reported
4	107261088	C	G	0.9223	0.2016	0.9962	4.76e-06	rs535538522	6942	GCST90274839	Tumor necrosis factor levels	TRUE	reported
4	126954768	T	C	0.246	0.0472	0.0296	1.87e-07	rs537908127	9243	GCST90274839	Tumor necrosis factor levels	TRUE	reported
4	146655350	A	G	0.1432	0.0309	0.0504	3.58e-06	rs9308195	11770	GCST90274839	Tumor necrosis factor levels	TRUE	reported
4	146657215	A	C	0.15	0.0311	0.0494	1.41e-06	rs6537370	11770	GCST90274839	Tumor necrosis factor levels	TRUE	reported
4	146657317	A	G	0.151	0.031	0.0495	1.11e-06	rs6537371	11770	GCST90274839	Tumor necrosis factor levels	TRUE	reported
4	146658520	T	C	-0.1517	0.031	0.9506	9.9e-07	rs4835254	11770	GCST90274839	Tumor necrosis factor levels	TRUE	reported
4	146686561	A	C	-0.1419	0.0306	0.9496	3.53e-06	rs4348115	11770	GCST90274839	Tumor necrosis factor levels	TRUE	reported
4	146687237	A	G	-0.1407	0.0308	0.9507	4.92e-06	rs10020778	11770	GCST90274839	Tumor necrosis factor levels	TRUE	reported
4	146689780	T	C	-0.1407	0.0308	0.9507	4.92e-06	rs7672621	11771	GCST90274839	Tumor necrosis factor levels	TRUE	reported
4	146691143	A	G	0.1415	0.0307	0.0493	4.04e-06	rs10023166	11771	GCST90274839	Tumor necrosis factor levels	TRUE	reported
4	146698362	T	C	0.1403	0.0307	0.0492	4.88e-06	rs6835987	11771	GCST90274839	Tumor necrosis factor levels	TRUE	reported
4	146698777	T	C	0.1402	0.0307	0.0494	4.95e-06	rs6537377	11765	GCST90274839	Tumor necrosis factor levels	TRUE	reported
4	146702844	A	G	0.1419	0.0306	0.0497	3.53e-06	rs11943804	11765	GCST90274839	Tumor necrosis factor levels	TRUE	reported
4	146709972	A	G	-0.1442	0.0312	0.9495	3.8e-06	rs7686983	11337	GCST90274839	Tumor necrosis factor levels	TRUE	reported
4	146713382	T	C	-0.1422	0.0307	0.9503	3.62e-06	rs6836085	11761	GCST90274839	Tumor necrosis factor levels	TRUE	reported
4	146725972	T	C	0.1432	0.0313	0.0504	4.76e-06	rs1567220	11337	GCST90274839	Tumor necrosis factor levels	TRUE	reported
4	146733067	T	C	0.1703	0.0357	0.0474	1.84e-06	rs532365265	9246	GCST90274839	Tumor necrosis factor levels	TRUE	reported
4	146733068	C	G	-0.1684	0.0363	0.9545	3.5e-06	rs552153054	9246	GCST90274839	Tumor necrosis factor levels	TRUE	reported
5	158612691	C	G	-0.3426	0.0746	0.0109	4.38e-06	rs138815057	10850	GCST90274839	Tumor necrosis factor levels	TRUE	reported
5	158688807	A	G	-0.3458	0.0713	0.0124	1.24e-06	rs138041503	10850	GCST90274839	Tumor necrosis factor levels	TRUE	reported
5	158787872	A	G	-0.3326	0.0682	0.0133	1.08e-06	rs140267706	10850	GCST90274839	Tumor necrosis factor levels	TRUE	reported
5	158795166	A	G	-0.3229	0.0685	0.013	2.43e-06	rs181928152	10850	GCST90274839	Tumor necrosis factor levels	TRUE	reported
6	44325149	T	C	0.1175	0.0255	0.078	4.07e-06	rs867063	11337	GCST90274839	Tumor necrosis factor levels	TRUE	reported
6	50636682	T	C	-0.9009	0.1957	0.0029	4.15e-06	rs150276417	8144	GCST90274839	Tumor necrosis factor levels	TRUE	reported
6	126763757	T	C	0.2564	0.0547	0.9804	2.77e-06	rs140628391	10850	GCST90274839	Tumor necrosis factor levels	TRUE	reported
6	126932205	A	G	-0.2495	0.054	0.02	3.83e-06	rs142252069	10850	GCST90274839	Tumor necrosis factor levels	TRUE	reported
6	126935028	C	G	0.2515	0.0542	0.9799	3.48e-06	rs138382087	10850	GCST90274839	Tumor necrosis factor levels	TRUE	reported
6	127029711	A	G	-0.3085	0.0659	0.0165	2.85e-06	rs182110721	8966	GCST90274839	Tumor necrosis factor levels	TRUE	reported
6	127463809	T	C	0.2488	0.0539	0.9806	3.91e-06	rs11751860	10850	GCST90274839	Tumor necrosis factor levels	TRUE	reported
6	127470696	CAT	C	0.2979	0.0607	0.9796	9.21e-07	rs571581819	7456	GCST90274839	Tumor necrosis factor levels	TRUE	reported
6	127494091	A	G	0.2512	0.0533	0.9796	2.44e-06	rs138684734	10850	GCST90274839	Tumor necrosis factor levels	TRUE	reported
7	80365289	A	G	-0.3062	0.0629	0.0173	1.13e-06	rs117427219	10850	GCST90274839	Tumor necrosis factor levels	TRUE	reported
7	94889817	C	G	0.8017	0.1685	0.9959	1.96e-06	rs188875898	7308	GCST90274839	Tumor necrosis factor levels	TRUE	reported
7	141255992	T	C	0.5942	0.1165	0.0052	3.39e-07	rs181628505	7844	GCST90274839	Tumor necrosis factor levels	TRUE	reported
7	150136479	C	G	-0.0644	0.0141	0.6553	4.94e-06	rs7777466	11337	GCST90274839	Tumor necrosis factor levels	TRUE	reported
7	150140762	T	C	-0.0606	0.0131	0.5366	3.73e-06	rs7806921	11778	GCST90274839	Tumor necrosis factor levels	TRUE	reported
8	136662225	A	G	-0.298	0.0646	0.9824	3.97e-06	rs148560093	9984	GCST90274839	Tumor necrosis factor levels	TRUE	reported
8	140387824	T	C	0.3743	0.0791	0.012	2.22e-06	rs187207093	8290	GCST90274839	Tumor necrosis factor levels	TRUE	reported
8	140516645	T	C	-0.347	0.0656	0.9867	1.23e-07	rs190785829	11298	GCST90274839	Tumor necrosis factor levels	TRUE	reported
10	11469516	A	G	-0.1207	0.0247	0.0885	1.03e-06	rs12354434	11337	GCST90274839	Tumor necrosis factor levels	TRUE	reported
10	11472715	T	C	0.1154	0.0243	0.9102	2.04e-06	rs11257089	11337	GCST90274839	Tumor necrosis factor levels	TRUE	reported
10	37029326	A	G	-0.6149	0.1245	0.9943	7.85e-07	rs148473929	7844	GCST90274839	Tumor necrosis factor levels	TRUE	reported
10	73528448	A	C	0.4306	0.0931	0.0072	3.74e-06	rs147852745	9648	GCST90274839	Tumor necrosis factor levels	TRUE	reported
10	106907980	A	G	0.0652	0.0142	0.7149	4.4e-06	rs11192339	11781	GCST90274839	Tumor necrosis factor levels	TRUE	reported
10	106909970	A	G	-0.0653	0.0142	0.2861	4.25e-06	rs1377015	11782	GCST90274839	Tumor necrosis factor levels	TRUE	reported
11	44470994	T	TTTTG	0.0951	0.0207	0.1896	4.34e-06	rs10675812	7943	GCST90274839	Tumor necrosis factor levels	TRUE	reported
12	50798083	A	G	-0.3653	0.0754	0.9888	1.27e-06	rs183353492	10206	GCST90274839	Tumor necrosis factor levels	TRUE	reported
12	50824101	T	C	0.3405	0.066	0.0132	2.48e-07	rs141295666	11337	GCST90274839	Tumor necrosis factor levels	TRUE	reported
12	50835758	A	G	0.3262	0.0658	0.0131	7.14e-07	rs74593630	11337	GCST90274839	Tumor necrosis factor levels	TRUE	reported
12	51024399	A	G	-0.3327	0.0695	0.9881	1.69e-06	rs186007943	10850	GCST90274839	Tumor necrosis factor levels	TRUE	reported
12	51121413	A	G	-0.326	0.068	0.9874	1.63e-06	rs74689988	10850	GCST90274839	Tumor necrosis factor levels	TRUE	reported
13	20771603	T	TA	-0.0883	0.0187	0.3095	2.34e-06	rs71074267	7943	GCST90274839	Tumor necrosis factor levels	TRUE	reported
13	75787010	T	C	-0.2983	0.0622	0.0182	1.62e-06	rs9593048	8975	GCST90274839	Tumor necrosis factor levels	TRUE	reported
13	114999705	C	G	0.5401	0.1183	0.9942	4.98e-06	rs17290888	7646	GCST90274839	Tumor necrosis factor levels	TRUE	reported
14	31008492	T	C	-0.3766	0.0801	0.0107	2.58e-06	rs146977126	9497	GCST90274839	Tumor necrosis factor levels	TRUE	reported
15	98409431	CT	C	-0.3487	0.0753	0.0147	3.64e-06	rs201738671	7943	GCST90274839	Tumor necrosis factor levels	TRUE	reported
17	10368444	T	C	-0.1299	0.0282	0.9369	4.1e-06	rs2874358	11337	GCST90274839	Tumor necrosis factor levels	TRUE	reported
17	10371668	A	C	0.1302	0.0282	0.0628	3.89e-06	rs11656907	11337	GCST90274839	Tumor necrosis factor levels	TRUE	reported
17	10373687	A	G	0.1295	0.0276	0.0617	2.71e-06	rs11650104	11779	GCST90274839	Tumor necrosis factor levels	TRUE	reported
17	10380939	C	G	0.1296	0.0276	0.0614	2.66e-06	rs4791991	11775	GCST90274839	Tumor necrosis factor levels	TRUE	reported
17	10415040	A	T	0.1305	0.0285	0.0614	4.67e-06	rs4791997	11337	GCST90274839	Tumor necrosis factor levels	TRUE	reported
17	10415840	A	G	0.1303	0.0285	0.0614	4.83e-06	rs2007027	11337	GCST90274839	Tumor necrosis factor levels	TRUE	reported
17	10503315	A	T	-0.1367	0.0287	0.9384	1.91e-06	rs1266162	11337	GCST90274839	Tumor necrosis factor levels	TRUE	reported
17	10503956	A	T	0.1372	0.0288	0.0615	1.9e-06	rs1266163	11337	GCST90274839	Tumor necrosis factor levels	TRUE	reported
17	10505354	A	G	-0.1371	0.0288	0.9383	1.93e-06	rs1006727	11337	GCST90274839	Tumor necrosis factor levels	TRUE	reported
17	10526900	T	C	0.1436	0.0312	0.048	4.17e-06	rs77884633	11772	GCST90274839	Tumor necrosis factor levels	TRUE	reported
17	15740146	T	C	-0.0836	0.0183	0.344	4.92e-06	rs9913313	7957	GCST90274839	Tumor necrosis factor levels	TRUE	reported
19	33635043	T	C	0.1146	0.0242	0.0921	2.18e-06	rs11666137	10276	GCST90274839	Tumor necrosis factor levels	TRUE	reported
19	33635097	C	G	-0.1127	0.0226	0.8939	6.14e-07	rs12975019	10278	GCST90274839	Tumor necrosis factor levels	TRUE	reported
19	33636895	A	G	-0.096	0.0204	0.8861	2.53e-06	rs71335801	11785	GCST90274839	Tumor necrosis factor levels	TRUE	reported
19	33636919	T	C	0.0971	0.0203	0.1138	1.72e-06	rs17833557	11785	GCST90274839	Tumor necrosis factor levels	TRUE	reported
19	33638539	A	T	0.0978	0.0203	0.1149	1.45e-06	rs7249216	11780	GCST90274839	Tumor necrosis factor levels	TRUE	reported
19	33638641	T	C	-0.098	0.0203	0.885	1.38e-06	rs35863323	11784	GCST90274839	Tumor necrosis factor levels	TRUE	reported
19	33638804	T	G	-0.0975	0.0204	0.8863	1.76e-06	rs11667560	11783	GCST90274839	Tumor necrosis factor levels	TRUE	reported
19	33639079	T	C	-0.0943	0.0203	0.8837	3.4e-06	rs12986226	11783	GCST90274839	Tumor necrosis factor levels	TRUE	reported
20	2931738	C	G	0.51	0.1077	0.0088	2.19e-06	rs6138961	7308	GCST90274839	Tumor necrosis factor levels	TRUE	reported
22	45929427	A	C	-0.0806	0.0175	0.8292	4.11e-06	rs79513756	11784	GCST90274839	Tumor necrosis factor levels	TRUE	reported
22	45932279	T	C	0.0826	0.0177	0.1679	3.06e-06	rs9614693	11763	GCST90274839	Tumor necrosis factor levels	TRUE	reported
2	46306174	C	G	-0.2464	0.0539	0.0161	4.84e-06	rs145686993	14257	GCST90274829	Neurotrophin-3 levels	TRUE	reported
2	49260892	A	G	0.7616	0.1597	0.9957	1.85e-06	rs191048682	6260	GCST90274829	Neurotrophin-3 levels	TRUE	reported
2	72533814	T	C	-0.6666	0.1421	0.005	2.72e-06	rs182814306	7736	GCST90274829	Neurotrophin-3 levels	TRUE	reported
2	72871011	A	G	-0.6827	0.1384	0.0053	8.11e-07	rs180827029	7736	GCST90274829	Neurotrophin-3 levels	TRUE	reported
2	150591468	CT	C	0.1892	0.0407	0.0403	3.34e-06	rs527295217	10894	GCST90274829	Neurotrophin-3 levels	TRUE	reported
3	11251918	A	G	-0.9873	0.2136	0.9975	3.8e-06	rs150588014	6862	GCST90274829	Neurotrophin-3 levels	TRUE	reported
4	7533099	A	G	-0.1163	0.0251	0.0638	3.6e-06	rs79759094	14728	GCST90274829	Neurotrophin-3 levels	TRUE	reported
5	1731054	A	G	-0.0555	0.0121	0.3609	4.5e-06	rs12517801	14726	GCST90274829	Neurotrophin-3 levels	TRUE	reported
5	108393361	T	C	-0.5741	0.1243	0.0049	3.86e-06	rs190859335	7816	GCST90274829	Neurotrophin-3 levels	TRUE	reported
5	114451587	A	C	0.0582	0.012	0.5677	1.23e-06	rs2034246	14296	GCST90274829	Neurotrophin-3 levels	TRUE	reported
6	111688927	A	G	0.1364	0.0294	0.0429	3.49e-06	rs3218587	14744	GCST90274829	Neurotrophin-3 levels	TRUE	reported
6	151273866	A	G	0.1329	0.0268	0.0568	7.09e-07	rs112588715	14296	GCST90274829	Neurotrophin-3 levels	TRUE	reported
6	151293888	T	C	0.1366	0.0263	0.0567	2.06e-07	rs112418830	14296	GCST90274829	Neurotrophin-3 levels	TRUE	reported
7	8762956	A	G	-0.2393	0.0507	0.0175	2.36e-06	rs2107473	13394	GCST90274829	Neurotrophin-3 levels	TRUE	reported
7	40026172	A	C	-0.2571	0.0553	0.9866	3.33e-06	rs17537796	14254	GCST90274829	Neurotrophin-3 levels	TRUE	reported
7	40060400	T	C	-0.2509	0.0549	0.9867	4.87e-06	rs17496436	14256	GCST90274829	Neurotrophin-3 levels	TRUE	reported
7	152298228	T	C	-0.092	0.02	0.1114	4.22e-06	rs73166403	14296	GCST90274829	Neurotrophin-3 levels	TRUE	reported
8	38959307	A	T	0.588	0.1223	0.0053	1.53e-06	rs189291520	8330	GCST90274829	Neurotrophin-3 levels	TRUE	reported
8	39004791	A	T	-0.5733	0.1239	0.9947	3.71e-06	rs147988397	8330	GCST90274829	Neurotrophin-3 levels	TRUE	reported
8	39414662	A	C	-0.5838	0.1137	0.9946	2.83e-07	rs186473019	8674	GCST90274829	Neurotrophin-3 levels	TRUE	reported
8	72031901	C	G	0.058	0.0125	0.3811	3.48e-06	rs72652073	14296	GCST90274829	Neurotrophin-3 levels	TRUE	reported
8	103471748	CT	C	0.6241	0.129	0.007	1.31e-06	rs563564399	6447	GCST90274829	Neurotrophin-3 levels	TRUE	reported
9	75569354	T	G	-1.1024	0.2133	0.9977	2.36e-07	rs548840523	6780	GCST90274829	Neurotrophin-3 levels	TRUE	reported
9	87478172	T	G	0.0557	0.012	0.5265	3.46e-06	rs10780690	14296	GCST90274829	Neurotrophin-3 levels	TRUE	reported
10	114956255	C	G	-0.7398	0.1519	0.0041	1.11e-06	rs183099698	6780	GCST90274829	Neurotrophin-3 levels	TRUE	reported
10	115054898	A	G	-0.7527	0.1615	0.0038	3.15e-06	rs560161788	6942	GCST90274829	Neurotrophin-3 levels	TRUE	reported
10	115833862	T	C	-0.1859	0.0386	0.0249	1.46e-06	rs146532158	14741	GCST90274829	Neurotrophin-3 levels	TRUE	reported
10	123224530	CT	C	0.0682	0.0143	0.6063	1.85e-06	rs35681798	10894	GCST90274829	Neurotrophin-3 levels	TRUE	reported
10	123227146	T	TC	0.0661	0.0142	0.582	3.24e-06	rs5788498	10894	GCST90274829	Neurotrophin-3 levels	TRUE	reported
11	92964994	T	C	0.2806	0.0603	0.0283	3.27e-06	rs138731987	12156	GCST90274829	Neurotrophin-3 levels	TRUE	reported
11	101687730	T	C	0.0865	0.0187	0.1104	3.73e-06	rs11225017	14740	GCST90274829	Neurotrophin-3 levels	TRUE	reported
11	101695749	A	T	-0.0851	0.0186	0.889	4.76e-06	rs11225024	14741	GCST90274829	Neurotrophin-3 levels	TRUE	reported
11	101727684	A	C	-0.0973	0.0203	0.8737	1.64e-06	rs11225042	12412	GCST90274829	Neurotrophin-3 levels	TRUE	reported
11	123375056	A	G	0.0582	0.0125	0.3022	3.22e-06	rs2846299	14721	GCST90274829	Neurotrophin-3 levels	TRUE	reported
12	854655	G	GT	-0.0673	0.0142	0.4467	2.14e-06	rs72215366	10893	GCST90274829	Neurotrophin-3 levels	TRUE	reported
12	5544331	T	C	0.0909	0.0195	0.901	3.14e-06	rs74056337	14740	GCST90274829	Neurotrophin-3 levels	TRUE	reported
12	5544625	A	G	-0.0913	0.0196	0.0978	3.19e-06	rs73039962	14740	GCST90274829	Neurotrophin-3 levels	TRUE	reported
12	5545532	A	G	0.0921	0.0196	0.9017	2.61e-06	rs73039966	14740	GCST90274829	Neurotrophin-3 levels	TRUE	reported
12	5546570	C	G	-0.0912	0.0193	0.1014	2.3e-06	rs55924827	14740	GCST90274829	Neurotrophin-3 levels	TRUE	reported
12	5546911	A	T	0.0923	0.0195	0.9017	2.21e-06	rs56410681	14744	GCST90274829	Neurotrophin-3 levels	TRUE	reported
12	5547096	T	C	0.0942	0.0195	0.9019	1.36e-06	rs73039971	14744	GCST90274829	Neurotrophin-3 levels	TRUE	reported
12	5547187	A	C	0.0953	0.0195	0.9016	1.02e-06	rs73039974	14744	GCST90274829	Neurotrophin-3 levels	TRUE	reported
12	5547759	T	G	-0.0948	0.0194	0.0989	1.03e-06	rs67394720	14744	GCST90274829	Neurotrophin-3 levels	TRUE	reported
12	5549203	A	G	0.0942	0.0194	0.9008	1.2e-06	rs67523679	14744	GCST90274829	Neurotrophin-3 levels	TRUE	reported
12	5549456	T	C	-0.094	0.0194	0.0989	1.26e-06	rs73039984	14743	GCST90274829	Neurotrophin-3 levels	TRUE	reported
12	5549572	C	G	0.0948	0.0194	0.9018	1.03e-06	rs66856138	14744	GCST90274829	Neurotrophin-3 levels	TRUE	reported
12	5549863	A	G	0.0943	0.0193	0.9013	1.03e-06	rs68005060	14744	GCST90274829	Neurotrophin-3 levels	TRUE	reported
12	5550338	T	C	0.0946	0.0194	0.9014	1.08e-06	rs66497710	14744	GCST90274829	Neurotrophin-3 levels	TRUE	reported
12	5550738	A	G	-0.0947	0.0194	0.0984	1.05e-06	rs17784533	14744	GCST90274829	Neurotrophin-3 levels	TRUE	reported
12	5680104	A	T	0.1106	0.022	0.0799	4.98e-07	rs58399805	14737	GCST90274829	Neurotrophin-3 levels	TRUE	reported
12	5683260	T	C	0.1045	0.0222	0.079	2.51e-06	rs79426122	14736	GCST90274829	Neurotrophin-3 levels	TRUE	reported
13	52350989	A	G	-1.0673	0.23	0.0021	3.48e-06	rs502641	6942	GCST90274829	Neurotrophin-3 levels	TRUE	reported
14	19356757	A	C	-0.1076	0.0219	0.8004	8.96e-07	rs540074689	10703	GCST90274829	Neurotrophin-3 levels	TRUE	reported
15	29055148	T	C	-0.8586	0.1807	0.9918	2.02e-06	rs7177508	5540	GCST90274829	Neurotrophin-3 levels	TRUE	reported
15	29057655	A	G	-0.9202	0.2015	0.9911	4.95e-06	rs9744156	5540	GCST90274829	Neurotrophin-3 levels	TRUE	reported
15	88431554	A	T	-0.1041	0.0225	0.0784	3.72e-06	rs76243922	14726	GCST90274829	Neurotrophin-3 levels	TRUE	reported
15	88452212	A	C	0.1659	0.0347	0.9689	1.74e-06	rs117322108	14744	GCST90274829	Neurotrophin-3 levels	TRUE	reported
15	88514162	T	G	0.111	0.0163	0.8526	9.77e-12	rs9944243	14737	GCST90274829	Neurotrophin-3 levels	TRUE	reported
15	88514855	C	G	-0.1168	0.0164	0.1435	1.06e-12	rs28735437	14737	GCST90274829	Neurotrophin-3 levels	TRUE	reported
15	88518599	T	C	-0.1276	0.0209	0.0837	1.03e-09	rs117970302	14737	GCST90274829	Neurotrophin-3 levels	TRUE	reported
15	88524788	A	G	0.113	0.017	0.8697	2.99e-11	rs16941097	14740	GCST90274829	Neurotrophin-3 levels	TRUE	reported
15	88526109	T	TG	-0.1106	0.0198	0.1213	2.33e-08	rs143506671	11341	GCST90274829	Neurotrophin-3 levels	TRUE	reported
15	88529333	A	T	0.1067	0.0165	0.8592	1e-10	rs2009853	14742	GCST90274829	Neurotrophin-3 levels	TRUE	reported
15	88546516	C	G	0.1128	0.0173	0.8723	7.02e-11	rs10520671	14736	GCST90274829	Neurotrophin-3 levels	TRUE	reported
15	88549151	C	G	-0.1079	0.0166	0.139	8.03e-11	rs12324332	14735	GCST90274829	Neurotrophin-3 levels	TRUE	reported
15	88550442	A	G	-0.1057	0.0171	0.1287	6.36e-10	rs11073759	14733	GCST90274829	Neurotrophin-3 levels	TRUE	reported
15	88554552	A	G	0.1098	0.0164	0.858	2.15e-11	rs1017757	14737	GCST90274829	Neurotrophin-3 levels	TRUE	reported
15	88554878	T	C	0.1134	0.0165	0.8598	6.3e-12	rs4989257	14737	GCST90274829	Neurotrophin-3 levels	TRUE	reported
15	88569163	A	G	0.1135	0.0172	0.8713	4.14e-11	rs28643331	14734	GCST90274829	Neurotrophin-3 levels	TRUE	reported
15	88569277	T	C	0.1129	0.0173	0.8732	6.75e-11	rs28434317	14735	GCST90274829	Neurotrophin-3 levels	TRUE	reported
15	88569295	A	G	-0.115	0.0174	0.1256	3.86e-11	rs28517543	14735	GCST90274829	Neurotrophin-3 levels	TRUE	reported
15	88571084	A	G	-0.1136	0.0174	0.1256	6.63e-11	rs28714295	14735	GCST90274829	Neurotrophin-3 levels	TRUE	reported
15	88573999	T	TA	-0.1191	0.0222	0.1189	8.1e-08	rs60683158	9349	GCST90274829	Neurotrophin-3 levels	TRUE	reported
15	88575886	T	C	-0.1207	0.0202	0.0906	2.3e-09	rs74027762	14743	GCST90274829	Neurotrophin-3 levels	TRUE	reported
15	88576703	T	G	-0.1213	0.0202	0.0906	1.91e-09	rs77116979	14743	GCST90274829	Neurotrophin-3 levels	TRUE	reported
15	88578720	T	C	-0.1174	0.0202	0.0903	6.18e-09	rs28687205	14743	GCST90274829	Neurotrophin-3 levels	TRUE	reported
15	88581440	A	T	-0.1168	0.0217	0.089	7.35e-08	rs57644223	12858	GCST90274829	Neurotrophin-3 levels	TRUE	reported
15	88581448	A	T	-0.1207	0.0225	0.0875	8.12e-08	rs545248218	12214	GCST90274829	Neurotrophin-3 levels	TRUE	reported
15	88581458	A	T	-0.1207	0.0225	0.0875	8.12e-08	rs56239353	12214	GCST90274829	Neurotrophin-3 levels	TRUE	reported
15	88583352	G	GC	0.1128	0.0226	0.9079	6e-07	rs113258898	11340	GCST90274829	Neurotrophin-3 levels	TRUE	reported
15	88585656	C	G	0.118	0.0202	0.9091	5.17e-09	rs12594253	14743	GCST90274829	Neurotrophin-3 levels	TRUE	reported
15	88589780	A	G	0.1163	0.0198	0.9057	4.26e-09	rs8033409	14741	GCST90274829	Neurotrophin-3 levels	TRUE	reported
15	88590113	A	G	-0.1171	0.0203	0.0895	8e-09	rs8032073	14743	GCST90274829	Neurotrophin-3 levels	TRUE	reported
15	88592323	T	C	0.1197	0.0202	0.9087	3.11e-09	rs16941171	14743	GCST90274829	Neurotrophin-3 levels	TRUE	reported
15	88592449	A	G	-0.1209	0.0205	0.0885	3.69e-09	rs16941174	14743	GCST90274829	Neurotrophin-3 levels	TRUE	reported
15	88595704	T	C	-0.1225	0.0204	0.0915	1.91e-09	rs12592635	14744	GCST90274829	Neurotrophin-3 levels	TRUE	reported
17	29843690	A	G	-0.2752	0.0601	0.9868	4.67e-06	rs187443426	13809	GCST90274829	Neurotrophin-3 levels	TRUE	reported
18	55310060	C	G	-0.0819	0.0172	0.7735	1.92e-06	rs376150779	10894	GCST90274829	Neurotrophin-3 levels	TRUE	reported
18	72116928	C	G	-0.0627	0.0134	0.3504	2.88e-06	rs7242622	14296	GCST90274829	Neurotrophin-3 levels	TRUE	reported
18	72116993	T	C	-0.0634	0.0133	0.3563	1.87e-06	rs2288265	14296	GCST90274829	Neurotrophin-3 levels	TRUE	reported
18	72116996	T	G	-0.0631	0.0133	0.3566	2.09e-06	rs2288264	14296	GCST90274829	Neurotrophin-3 levels	TRUE	reported
18	72116998	T	G	-0.0629	0.0133	0.3569	2.25e-06	rs2288263	14296	GCST90274829	Neurotrophin-3 levels	TRUE	reported
18	72117258	T	C	-0.0646	0.0126	0.3944	2.94e-07	rs1559804	14296	GCST90274829	Neurotrophin-3 levels	TRUE	reported
18	72117396	A	T	0.0631	0.0127	0.6226	6.75e-07	rs1559803	14296	GCST90274829	Neurotrophin-3 levels	TRUE	reported
18	72121426	G	GA	-0.0683	0.014	0.5075	1.07e-06	rs11412987	10894	GCST90274829	Neurotrophin-3 levels	TRUE	reported
18	72122611	A	G	-0.0704	0.0121	0.5039	5.95e-09	rs2162256	14296	GCST90274829	Neurotrophin-3 levels	TRUE	reported
18	72123099	A	G	-0.0623	0.0119	0.4311	1.65e-07	rs8083789	14733	GCST90274829	Neurotrophin-3 levels	TRUE	reported
18	72123370	T	G	0.069	0.0121	0.5215	1.18e-08	rs12454720	14296	GCST90274829	Neurotrophin-3 levels	TRUE	reported
18	72123860	C	G	0.0734	0.0124	0.5258	3.23e-09	rs11151953	14296	GCST90274829	Neurotrophin-3 levels	TRUE	reported
18	72123909	C	G	0.0687	0.0124	0.5798	3.02e-08	rs10871735	14296	GCST90274829	Neurotrophin-3 levels	TRUE	reported
18	72124182	T	C	-0.0698	0.0124	0.4187	1.81e-08	rs73472576	14296	GCST90274829	Neurotrophin-3 levels	TRUE	reported
18	72124544	C	G	-0.073	0.0133	0.4702	4.05e-08	rs62097412	12412	GCST90274829	Neurotrophin-3 levels	TRUE	reported
18	72131182	T	C	-0.0652	0.0139	0.255	2.72e-06	rs4892224	13241	GCST90274829	Neurotrophin-3 levels	TRUE	reported
19	5358006	T	C	0.8182	0.1715	0.0045	1.83e-06	rs180874238	5540	GCST90274829	Neurotrophin-3 levels	TRUE	reported
22	43649715	T	C	0.1823	0.0398	0.0287	4.64e-06	rs5751454	13680	GCST90274829	Neurotrophin-3 levels	TRUE	reported
1	35587982	T	C	0.6969	0.1469	0.0038	2.09e-06	rs114302925	6942	GCST90274801	Interleukin-17A levels	TRUE	reported
1	96622380	A	C	-0.0802	0.0164	0.7781	1.01e-06	rs33998516	11336	GCST90274801	Interleukin-17A levels	TRUE	reported
1	96637145	A	T	0.0633	0.0136	0.4411	3.25e-06	rs506567	11336	GCST90274801	Interleukin-17A levels	TRUE	reported
1	96638665	A	C	-0.0673	0.0146	0.4959	4.03e-06	rs321560	9453	GCST90274801	Interleukin-17A levels	TRUE	reported
1	96639663	A	G	0.0651	0.014	0.5024	3.32e-06	rs167689	9896	GCST90274801	Interleukin-17A levels	TRUE	reported
1	96648533	A	G	-0.0679	0.0141	0.4815	1.47e-06	rs321583	9893	GCST90274801	Interleukin-17A levels	TRUE	reported
1	96650724	A	G	-0.0594	0.0128	0.487	3.47e-06	rs517993	11773	GCST90274801	Interleukin-17A levels	TRUE	reported
1	96658968	A	C	0.0594	0.0128	0.4964	3.47e-06	rs321574	11763	GCST90274801	Interleukin-17A levels	TRUE	reported
1	96986415	A	ATGTG	-0.0912	0.0181	0.3378	4.69e-07	rs10656456	7943	GCST90274801	Interleukin-17A levels	TRUE	reported
1	152112863	A	C	-0.3417	0.0723	0.9845	2.29e-06	rs80314453	8487	GCST90274801	Interleukin-17A levels	TRUE	reported
2	13439971	T	C	-0.2412	0.0522	0.0212	3.82e-06	rs75558113	10913	GCST90274801	Interleukin-17A levels	TRUE	reported
2	13468626	T	C	-0.2432	0.0525	0.021	3.61e-06	rs75788494	10574	GCST90274801	Interleukin-17A levels	TRUE	reported
3	63464270	T	C	-0.1576	0.0342	0.9564	4.06e-06	rs17068691	11776	GCST90274801	Interleukin-17A levels	TRUE	reported
3	63484616	T	C	0.1688	0.0349	0.0418	1.32e-06	rs115193412	11778	GCST90274801	Interleukin-17A levels	TRUE	reported
3	63485488	A	G	-0.1624	0.0348	0.9576	3.06e-06	rs1505589	11780	GCST90274801	Interleukin-17A levels	TRUE	reported
3	63485796	A	G	0.1639	0.0343	0.0435	1.77e-06	rs57780067	11779	GCST90274801	Interleukin-17A levels	TRUE	reported
3	63486745	A	G	-0.1628	0.0342	0.9559	1.93e-06	rs59171567	11780	GCST90274801	Interleukin-17A levels	TRUE	reported
3	63488994	T	G	-0.1605	0.034	0.9561	2.35e-06	rs58745721	11770	GCST90274801	Interleukin-17A levels	TRUE	reported
3	189579511	A	G	-0.0585	0.0128	0.5609	4.87e-06	rs17448036	11783	GCST90274801	Interleukin-17A levels	TRUE	reported
4	36705633	T	G	-0.3091	0.0619	0.9854	5.93e-07	rs76821290	11336	GCST90274801	Interleukin-17A levels	TRUE	reported
4	117179775	A	T	0.6296	0.1275	0.9953	7.89e-07	rs192919274	7843	GCST90274801	Interleukin-17A levels	TRUE	reported
4	117491123	A	G	0.7894	0.1641	0.9963	1.51e-06	rs190589812	6942	GCST90274801	Interleukin-17A levels	TRUE	reported
4	117612924	T	C	0.8348	0.155	0.9959	7.21e-08	rs187663944	6942	GCST90274801	Interleukin-17A levels	TRUE	reported
4	117619219	T	G	0.7744	0.1539	0.9959	4.86e-07	rs180784775	6942	GCST90274801	Interleukin-17A levels	TRUE	reported
6	3011265	A	G	0.8306	0.1727	0.997	1.51e-06	rs78394657	6942	GCST90274801	Interleukin-17A levels	TRUE	reported
6	32628224	A	T	0.0923	0.0189	0.221	1.04e-06	rs41270871	8742	GCST90274801	Interleukin-17A levels	TRUE	reported
6	32629603	T	C	0.0725	0.0157	0.631	3.88e-06	rs9273852	9453	GCST90274801	Interleukin-17A levels	TRUE	reported
6	32632864	A	G	-0.0796	0.0166	0.3426	1.63e-06	rs9274409	9453	GCST90274801	Interleukin-17A levels	TRUE	reported
6	110765650	A	G	-0.9351	0.1941	0.9967	1.45e-06	rs186609440	6861	GCST90274801	Interleukin-17A levels	TRUE	reported
6	139404212	A	G	-0.6753	0.1456	0.0082	3.52e-06	rs184632767	6747	GCST90274801	Interleukin-17A levels	TRUE	reported
7	6380998	A	G	-0.068	0.0148	0.2897	4.34e-06	rs28852438	11336	GCST90274801	Interleukin-17A levels	TRUE	reported
7	16426719	T	C	0.6836	0.1416	0.9942	1.38e-06	rs577341939	7348	GCST90274801	Interleukin-17A levels	TRUE	reported
7	23091610	A	C	0.4589	0.0971	0.01	2.29e-06	rs183971111	7307	GCST90274801	Interleukin-17A levels	TRUE	reported
7	24281124	A	G	-0.3114	0.0644	0.9838	1.33e-06	rs3025138	10849	GCST90274801	Interleukin-17A levels	TRUE	reported
7	152644396	A	G	-0.3983	0.0872	0.0146	4.93e-06	rs150686720	7388	GCST90274801	Interleukin-17A levels	TRUE	reported
8	70016837	A	G	-0.0817	0.0168	0.1985	1.16e-06	rs34426108	11336	GCST90274801	Interleukin-17A levels	TRUE	reported
8	70017087	A	G	0.0807	0.0167	0.7983	1.35e-06	rs13273748	11336	GCST90274801	Interleukin-17A levels	TRUE	reported
8	70031623	T	G	0.0815	0.0167	0.7994	1.06e-06	rs34396989	11336	GCST90274801	Interleukin-17A levels	TRUE	reported
8	70033028	T	C	-0.0782	0.0163	0.1992	1.61e-06	rs34128621	11762	GCST90274801	Interleukin-17A levels	TRUE	reported
8	70043260	A	G	-0.0784	0.0162	0.1995	1.3e-06	rs16935565	11779	GCST90274801	Interleukin-17A levels	TRUE	reported
8	70049880	T	C	0.0782	0.0162	0.7995	1.38e-06	rs34678633	11781	GCST90274801	Interleukin-17A levels	TRUE	reported
8	70051496	A	G	0.0797	0.0162	0.8002	8.67e-07	rs72654023	11782	GCST90274801	Interleukin-17A levels	TRUE	reported
8	70052188	T	C	0.0792	0.0162	0.8	1.01e-06	rs13273162	11781	GCST90274801	Interleukin-17A levels	TRUE	reported
8	70052232	T	G	0.079	0.0162	0.8	1.08e-06	rs35008581	11782	GCST90274801	Interleukin-17A levels	TRUE	reported
8	70052561	A	G	-0.0791	0.0162	0.1999	1.05e-06	rs34510436	11782	GCST90274801	Interleukin-17A levels	TRUE	reported
8	70053126	T	G	0.0776	0.0162	0.7999	1.67e-06	rs35347982	11783	GCST90274801	Interleukin-17A levels	TRUE	reported
8	70053343	A	G	-0.0781	0.0162	0.2003	1.43e-06	rs35731583	11784	GCST90274801	Interleukin-17A levels	TRUE	reported
8	70053528	T	C	-0.0794	0.0162	0.2004	9.52e-07	rs35820030	11784	GCST90274801	Interleukin-17A levels	TRUE	reported
8	70053685	A	G	-0.0792	0.0162	0.2005	1.01e-06	rs34202413	11784	GCST90274801	Interleukin-17A levels	TRUE	reported
8	70053747	T	G	0.0792	0.0162	0.7996	1.01e-06	rs13256439	11784	GCST90274801	Interleukin-17A levels	TRUE	reported
8	70054308	T	C	-0.0788	0.0162	0.2007	1.15e-06	rs4392904	11784	GCST90274801	Interleukin-17A levels	TRUE	reported
8	70054335	T	C	-0.079	0.0162	0.2006	1.08e-06	rs4009037	11784	GCST90274801	Interleukin-17A levels	TRUE	reported
8	70054991	A	G	0.0786	0.0162	0.7996	1.22e-06	rs72654027	11783	GCST90274801	Interleukin-17A levels	TRUE	reported
8	70055382	A	C	0.0793	0.0162	0.7994	9.83e-07	rs16935581	11784	GCST90274801	Interleukin-17A levels	TRUE	reported
8	70055548	A	G	-0.0786	0.0162	0.2008	1.22e-06	rs16935585	11783	GCST90274801	Interleukin-17A levels	TRUE	reported
8	70055578	T	C	-0.0793	0.0162	0.2005	9.83e-07	rs13273874	11782	GCST90274801	Interleukin-17A levels	TRUE	reported
8	70056441	A	C	-0.0793	0.0162	0.2004	9.83e-07	rs11786948	11783	GCST90274801	Interleukin-17A levels	TRUE	reported
8	70058894	A	G	-0.0792	0.0162	0.2006	1.01e-06	rs13273714	11783	GCST90274801	Interleukin-17A levels	TRUE	reported
8	70061600	T	C	-0.079	0.0162	0.2006	1.08e-06	rs13266869	11779	GCST90274801	Interleukin-17A levels	TRUE	reported
8	70064868	A	G	0.0838	0.0165	0.8015	3.8e-07	rs4348505	11777	GCST90274801	Interleukin-17A levels	TRUE	reported
8	70065183	A	T	-0.079	0.0162	0.2011	1.08e-06	rs4009038	11777	GCST90274801	Interleukin-17A levels	TRUE	reported
8	70065399	T	C	-0.0794	0.0162	0.2013	9.52e-07	rs1863591	11778	GCST90274801	Interleukin-17A levels	TRUE	reported
8	70065815	A	G	0.0813	0.0163	0.8019	6.11e-07	rs1350886	11764	GCST90274801	Interleukin-17A levels	TRUE	reported
8	70066172	T	C	0.0795	0.0162	0.798	9.23e-07	rs11776555	11772	GCST90274801	Interleukin-17A levels	TRUE	reported
8	70066200	T	C	-0.0803	0.0162	0.1993	7.17e-07	rs11786641	11779	GCST90274801	Interleukin-17A levels	TRUE	reported
8	70066234	T	C	-0.0804	0.0163	0.1988	8.12e-07	rs11786645	11776	GCST90274801	Interleukin-17A levels	TRUE	reported
8	70066240	A	G	-0.081	0.0163	0.1985	6.72e-07	rs11786693	11779	GCST90274801	Interleukin-17A levels	TRUE	reported
8	70066364	T	C	0.0805	0.0162	0.8004	6.73e-07	rs11776611	11779	GCST90274801	Interleukin-17A levels	TRUE	reported
8	70066527	T	C	0.0805	0.0162	0.8003	6.73e-07	rs11777326	11779	GCST90274801	Interleukin-17A levels	TRUE	reported
8	70067094	A	G	0.0796	0.0162	0.8004	8.94e-07	rs2142344	11779	GCST90274801	Interleukin-17A levels	TRUE	reported
8	70067347	T	G	-0.0804	0.0162	0.1988	6.94e-07	rs7833040	11779	GCST90274801	Interleukin-17A levels	TRUE	reported
8	70067664	T	C	-0.0802	0.0162	0.1999	7.4e-07	rs1426604	11779	GCST90274801	Interleukin-17A levels	TRUE	reported
8	70068900	T	C	0.0796	0.0162	0.8001	8.94e-07	rs7004795	11779	GCST90274801	Interleukin-17A levels	TRUE	reported
8	70074265	T	G	-0.0859	0.0167	0.1829	2.69e-07	rs11775631	11782	GCST90274801	Interleukin-17A levels	TRUE	reported
8	70081299	A	G	0.0853	0.0168	0.816	3.83e-07	rs67492634	11781	GCST90274801	Interleukin-17A levels	TRUE	reported
8	70083277	C	G	0.0874	0.0168	0.8167	1.97e-07	rs35201039	11783	GCST90274801	Interleukin-17A levels	TRUE	reported
8	70084098	A	G	0.0864	0.0168	0.8165	2.71e-07	rs2380520	11783	GCST90274801	Interleukin-17A levels	TRUE	reported
8	70085467	A	G	-0.0848	0.0167	0.1837	3.82e-07	rs66687352	11783	GCST90274801	Interleukin-17A levels	TRUE	reported
8	70086998	A	G	0.0848	0.0168	0.8171	4.47e-07	rs16935689	11782	GCST90274801	Interleukin-17A levels	TRUE	reported
8	70087848	T	C	0.0846	0.0168	0.817	4.76e-07	rs3765085	11783	GCST90274801	Interleukin-17A levels	TRUE	reported
8	70089437	T	C	-0.0842	0.0168	0.1826	5.39e-07	rs13274443	11783	GCST90274801	Interleukin-17A levels	TRUE	reported
8	70091546	A	G	-0.0845	0.0168	0.1829	4.91e-07	rs66901605	11784	GCST90274801	Interleukin-17A levels	TRUE	reported
8	70092938	A	G	0.0858	0.0168	0.8166	3.27e-07	rs11776744	11784	GCST90274801	Interleukin-17A levels	TRUE	reported
8	70094013	T	C	0.0851	0.0168	0.8172	4.07e-07	rs34706719	11783	GCST90274801	Interleukin-17A levels	TRUE	reported
8	70097053	T	C	0.0873	0.0168	0.8169	2.03e-07	rs16935708	11784	GCST90274801	Interleukin-17A levels	TRUE	reported
8	70100216	A	G	0.0861	0.0167	0.8153	2.53e-07	rs10504441	11783	GCST90274801	Interleukin-17A levels	TRUE	reported
8	70100725	A	G	0.0868	0.0167	0.8155	2.02e-07	rs2380522	11783	GCST90274801	Interleukin-17A levels	TRUE	reported
8	70104164	T	G	0.0852	0.0167	0.8159	3.36e-07	rs9298146	11784	GCST90274801	Interleukin-17A levels	TRUE	reported
8	70104317	A	G	0.084	0.0168	0.8168	5.73e-07	rs12679526	11784	GCST90274801	Interleukin-17A levels	TRUE	reported
8	70104358	C	G	-0.0861	0.0168	0.1834	2.98e-07	rs9298147	11783	GCST90274801	Interleukin-17A levels	TRUE	reported
8	70104496	T	C	-0.0865	0.0168	0.1834	2.62e-07	rs10095870	11784	GCST90274801	Interleukin-17A levels	TRUE	reported
8	70106321	A	T	-0.0888	0.017	0.1768	1.76e-07	rs7463508	11773	GCST90274801	Interleukin-17A levels	TRUE	reported
8	70106392	C	G	-0.0893	0.017	0.1776	1.5e-07	rs1462017	11774	GCST90274801	Interleukin-17A levels	TRUE	reported
8	70110256	A	C	-0.088	0.017	0.1786	2.26e-07	rs2126363	11773	GCST90274801	Interleukin-17A levels	TRUE	reported
8	70111489	T	C	0.0837	0.0181	0.8492	3.76e-06	rs10089322	11775	GCST90274801	Interleukin-17A levels	TRUE	reported
8	70117263	A	T	-0.0829	0.0181	0.1514	4.65e-06	rs67299716	11784	GCST90274801	Interleukin-17A levels	TRUE	reported
8	73428810	A	G	0.2104	0.0457	0.0218	4.15e-06	rs16938231	11777	GCST90274801	Interleukin-17A levels	TRUE	reported
8	73429848	T	C	-0.2188	0.0449	0.977	1.1e-06	rs6985810	11776	GCST90274801	Interleukin-17A levels	TRUE	reported
8	73434140	G	GA	0.2732	0.0538	0.0213	3.81e-07	rs146024485	8388	GCST90274801	Interleukin-17A levels	TRUE	reported
8	73434801	T	C	0.209	0.0453	0.022	3.96e-06	rs6992501	11780	GCST90274801	Interleukin-17A levels	TRUE	reported
8	73434861	G	GA	0.2791	0.0544	0.0209	2.89e-07	rs138947243	8387	GCST90274801	Interleukin-17A levels	TRUE	reported
8	73435843	G	GT	0.2631	0.0537	0.0213	9.61e-07	rs150706253	8388	GCST90274801	Interleukin-17A levels	TRUE	reported
8	73439278	A	G	0.2059	0.0449	0.0221	4.52e-06	rs74587793	11780	GCST90274801	Interleukin-17A levels	TRUE	reported
8	73450573	G	GA	-0.2424	0.0522	0.9777	3.42e-06	rs138750625	8390	GCST90274801	Interleukin-17A levels	TRUE	reported
8	73465656	A	AAAATTTT	-0.2503	0.0532	0.9784	2.54e-06	rs201130699	8391	GCST90274801	Interleukin-17A levels	TRUE	reported
8	73470617	G	GA	-0.2426	0.0529	0.9783	4.52e-06	rs141277769	8391	GCST90274801	Interleukin-17A levels	TRUE	reported
8	78211940	CAT	C	-0.2211	0.0468	0.0409	2.31e-06	rs201471614	7943	GCST90274801	Interleukin-17A levels	TRUE	reported
8	92779862	T	C	-0.4704	0.1021	0.0076	4.08e-06	rs116901320	8487	GCST90274801	Interleukin-17A levels	TRUE	reported
8	92802273	A	T	0.4873	0.1036	0.9924	2.56e-06	rs188872635	7586	GCST90274801	Interleukin-17A levels	TRUE	reported
9	27215497	T	C	-0.1279	0.0272	0.9323	2.57e-06	rs77529534	11775	GCST90274801	Interleukin-17A levels	TRUE	reported
9	31524081	T	C	0.1395	0.0293	0.948	1.93e-06	rs80208314	11767	GCST90274801	Interleukin-17A levels	TRUE	reported
9	31537675	A	G	-0.1361	0.0291	0.0533	2.91e-06	rs4617244	11769	GCST90274801	Interleukin-17A levels	TRUE	reported
9	31560030	C	G	-0.1467	0.0295	0.0555	6.6e-07	rs79982350	11336	GCST90274801	Interleukin-17A levels	TRUE	reported
9	91976386	A	G	0.0908	0.0192	0.1411	2.25e-06	rs4877075	11336	GCST90274801	Interleukin-17A levels	TRUE	reported
10	67955765	T	G	0.2446	0.0517	0.9819	2.23e-06	rs34557923	10913	GCST90274801	Interleukin-17A levels	TRUE	reported
10	68011276	A	C	-0.2478	0.054	0.0174	4.46e-06	rs139356297	10914	GCST90274801	Interleukin-17A levels	TRUE	reported
12	22971508	A	C	0.535	0.1109	0.0075	1.41e-06	rs12366301	7843	GCST90274801	Interleukin-17A levels	TRUE	reported
12	118130693	T	G	0.1696	0.0371	0.9648	4.84e-06	rs77595989	11767	GCST90274801	Interleukin-17A levels	TRUE	reported
14	28938616	A	C	0.5904	0.1292	0.9948	4.89e-06	rs142460896	7242	GCST90274801	Interleukin-17A levels	TRUE	reported
14	54033003	A	C	0.4644	0.0954	0.993	1.13e-06	rs183219823	9983	GCST90274801	Interleukin-17A levels	TRUE	reported
14	71348512	T	C	-0.7804	0.164	0.9946	1.95e-06	rs185155150	7286	GCST90274801	Interleukin-17A levels	TRUE	reported
15	27864665	C	G	-0.8232	0.1768	0.9964	3.22e-06	rs139204199	6861	GCST90274801	Interleukin-17A levels	TRUE	reported
16	8011846	T	C	-0.0726	0.0153	0.7391	2.08e-06	rs12599620	11336	GCST90274801	Interleukin-17A levels	TRUE	reported
16	8011922	C	G	-0.0701	0.0153	0.7421	4.61e-06	rs12596792	11336	GCST90274801	Interleukin-17A levels	TRUE	reported
17	2272057	T	C	0.2309	0.0486	0.0251	2.02e-06	rs2429911	11294	GCST90274801	Interleukin-17A levels	TRUE	reported
17	43658721	T	G	0.0884	0.0185	0.517	1.77e-06	rs2693361	7943	GCST90274801	Interleukin-17A levels	TRUE	reported
18	19075874	C	G	-0.7316	0.1567	0.0043	3.03e-06	rs181688050	6861	GCST90274801	Interleukin-17A levels	TRUE	reported
19	6024588	A	G	0.4278	0.0857	0.0172	5.98e-07	rs73547564	6441	GCST90274801	Interleukin-17A levels	TRUE	reported
19	6043299	C	G	-0.396	0.0853	0.9889	3.44e-06	rs640913	7937	GCST90274801	Interleukin-17A levels	TRUE	reported
19	39981708	G	GC	0.2002	0.0431	0.0367	3.4e-06	rs145654786	7943	GCST90274801	Interleukin-17A levels	TRUE	reported
20	18568918	A	G	0.5488	0.1197	0.0112	4.54e-06	rs6075372	6604	GCST90274801	Interleukin-17A levels	TRUE	reported
20	18726114	A	G	0.6297	0.1371	0.0045	4.37e-06	rs1884786	6942	GCST90274801	Interleukin-17A levels	TRUE	reported
20	18730744	A	G	0.6445	0.1393	0.0043	3.72e-06	rs77995916	6942	GCST90274801	Interleukin-17A levels	TRUE	reported
20	18731568	A	C	0.6408	0.1391	0.0043	4.09e-06	rs76273097	6942	GCST90274801	Interleukin-17A levels	TRUE	reported
20	18732347	A	G	-0.6567	0.1393	0.9957	2.43e-06	rs116679893	6942	GCST90274801	Interleukin-17A levels	TRUE	reported
20	18735723	A	C	-0.6591	0.1389	0.9956	2.08e-06	rs7263009	6942	GCST90274801	Interleukin-17A levels	TRUE	reported
20	18747026	T	G	-0.6715	0.1374	0.9956	1.02e-06	rs77259240	6942	GCST90274801	Interleukin-17A levels	TRUE	reported
20	18748868	A	G	0.6517	0.1383	0.0043	2.45e-06	rs74367952	6942	GCST90274801	Interleukin-17A levels	TRUE	reported
1	99867096	A	G	0.7196	0.1558	0.0036	3.86e-06	rs185166848	9361	GCST90274786	Protein S100-A12 levels	TRUE	reported
1	153330178	A	G	0.1097	0.0213	0.11	2.6e-07	rs12119788	14295	GCST90274786	Protein S100-A12 levels	TRUE	reported
1	153331849	A	G	-0.1547	0.0138	0.2576	3.64e-29	rs2916193	14294	GCST90274786	Protein S100-A12 levels	TRUE	reported
1	153333800	A	G	0.157	0.013	0.7135	1.4e-33	rs2070864	14295	GCST90274786	Protein S100-A12 levels	TRUE	reported
1	153334525	A	G	-0.1551	0.013	0.2813	8.18e-33	rs1560833	14295	GCST90274786	Protein S100-A12 levels	TRUE	reported
1	153335384	A	G	-0.1583	0.0129	0.2802	1.29e-34	rs1560832	14738	GCST90274786	Protein S100-A12 levels	TRUE	reported
1	153336018	C	G	0.157	0.0132	0.7204	1.27e-32	rs724781	14294	GCST90274786	Protein S100-A12 levels	TRUE	reported
1	153337943	A	G	-0.1726	0.0137	0.2623	2.15e-36	rs3014874	14294	GCST90274786	Protein S100-A12 levels	TRUE	reported
1	153339314	A	C	-0.1453	0.0187	0.8783	7.85e-15	rs11580993	14295	GCST90274786	Protein S100-A12 levels	TRUE	reported
1	153339782	A	G	-0.1574	0.0192	0.8888	2.45e-16	rs60752752	14295	GCST90274786	Protein S100-A12 levels	TRUE	reported
1	153342575	T	C	0.1546	0.0191	0.1099	5.76e-16	rs58644524	14295	GCST90274786	Protein S100-A12 levels	TRUE	reported
1	153343178	T	C	0.1593	0.0192	0.1081	1.07e-16	rs3014878	14295	GCST90274786	Protein S100-A12 levels	TRUE	reported
1	153343717	G	GC	0.1572	0.0222	0.1066	1.43e-12	rs35195593	10894	GCST90274786	Protein S100-A12 levels	TRUE	reported
1	153343881	A	G	-0.1613	0.0192	0.8922	4.43e-17	rs3014879	14295	GCST90274786	Protein S100-A12 levels	TRUE	reported
1	153343942	A	G	0.162	0.0192	0.1074	3.24e-17	rs12033317	14295	GCST90274786	Protein S100-A12 levels	TRUE	reported
1	153344374	C	G	-0.1584	0.0191	0.8913	1.1e-16	rs3014880	14295	GCST90274786	Protein S100-A12 levels	TRUE	reported
1	153344636	A	C	-0.1566	0.019	0.8905	1.69e-16	rs3006475	14295	GCST90274786	Protein S100-A12 levels	TRUE	reported
1	153344915	A	G	-0.1607	0.0192	0.8919	5.77e-17	rs3014881	14295	GCST90274786	Protein S100-A12 levels	TRUE	reported
1	153345682	T	C	-0.1591	0.0192	0.8918	1.17e-16	rs2916192	14295	GCST90274786	Protein S100-A12 levels	TRUE	reported
1	153345911	T	C	-0.1607	0.0191	0.8913	3.98e-17	rs2916191	14295	GCST90274786	Protein S100-A12 levels	TRUE	reported
1	153346263	A	G	-0.1615	0.0192	0.8916	4.05e-17	rs4772	14295	GCST90274786	Protein S100-A12 levels	TRUE	reported
1	153349110	A	C	0.1545	0.0192	0.1113	8.49e-16	rs3006476	13808	GCST90274786	Protein S100-A12 levels	TRUE	reported
1	153350207	A	AG	0.156	0.022	0.1089	1.33e-12	rs141832834	10894	GCST90274786	Protein S100-A12 levels	TRUE	reported
1	153352127	T	C	0.1555	0.0189	0.1096	1.91e-16	rs3014885	14295	GCST90274786	Protein S100-A12 levels	TRUE	reported
1	153352260	A	ACACCTAGGGTGGCGGCGGCTCCTTGGCAG	0.1798	0.0253	0.0913	1.19e-12	rs374815343	10894	GCST90274786	Protein S100-A12 levels	TRUE	reported
1	153352765	A	T	-0.1579	0.019	0.8915	9.53e-17	rs2916222	14295	GCST90274786	Protein S100-A12 levels	TRUE	reported
1	153352809	A	G	0.1614	0.0191	0.1076	2.91e-17	rs61803337	14295	GCST90274786	Protein S100-A12 levels	TRUE	reported
1	153352865	T	C	-0.1579	0.019	0.8914	9.53e-17	rs2916221	14295	GCST90274786	Protein S100-A12 levels	TRUE	reported
1	153353031	T	G	-0.1559	0.0191	0.8925	3.29e-16	rs61803338	14295	GCST90274786	Protein S100-A12 levels	TRUE	reported
1	153353169	A	G	0.1565	0.0189	0.1094	1.23e-16	rs2916218	14295	GCST90274786	Protein S100-A12 levels	TRUE	reported
1	153353198	A	G	-0.159	0.019	0.8914	5.84e-17	rs2916217	14295	GCST90274786	Protein S100-A12 levels	TRUE	reported
1	153353360	A	G	0.1583	0.019	0.1081	7.98e-17	rs2916216	14295	GCST90274786	Protein S100-A12 levels	TRUE	reported
1	153353412	T	C	0.1568	0.0191	0.1081	2.22e-16	rs3006477	14295	GCST90274786	Protein S100-A12 levels	TRUE	reported
1	153353451	T	G	0.1553	0.0189	0.1092	2.09e-16	rs2916215	14295	GCST90274786	Protein S100-A12 levels	TRUE	reported
1	153354406	T	C	-0.1613	0.019	0.8919	2.08e-17	rs12035710	14295	GCST90274786	Protein S100-A12 levels	TRUE	reported
1	153354450	T	G	0.1586	0.019	0.1083	6.98e-17	rs2916201	14295	GCST90274786	Protein S100-A12 levels	TRUE	reported
1	153355322	A	G	-0.1614	0.019	0.892	1.98e-17	rs11583949	14295	GCST90274786	Protein S100-A12 levels	TRUE	reported
1	153355392	T	G	0.1585	0.019	0.1087	7.3e-17	rs2916194	14295	GCST90274786	Protein S100-A12 levels	TRUE	reported
1	153355594	T	C	0.1569	0.0189	0.1095	1.03e-16	rs3006479	14295	GCST90274786	Protein S100-A12 levels	TRUE	reported
1	153355785	T	C	0.1544	0.0188	0.1089	2.16e-16	rs3006480	14730	GCST90274786	Protein S100-A12 levels	TRUE	reported
1	153356497	A	T	0.1586	0.0186	0.1111	1.5e-17	rs3006482	14740	GCST90274786	Protein S100-A12 levels	TRUE	reported
1	153356513	T	G	-0.1551	0.0188	0.8913	1.58e-16	rs3006483	14730	GCST90274786	Protein S100-A12 levels	TRUE	reported
1	153356719	A	AT	0.1306	0.0218	0.1237	2.09e-09	rs371154676	10407	GCST90274786	Protein S100-A12 levels	TRUE	reported
1	153356784	A	G	0.158	0.0189	0.1079	6.28e-17	rs12040887	14725	GCST90274786	Protein S100-A12 levels	TRUE	reported
1	153357021	A	G	0.157	0.0189	0.1084	9.83e-17	rs3006485	14729	GCST90274786	Protein S100-A12 levels	TRUE	reported
1	153357697	G	GC	0.1512	0.0216	0.1088	2.56e-12	rs34944983	11332	GCST90274786	Protein S100-A12 levels	TRUE	reported
1	153358685	T	C	0.1583	0.0189	0.108	5.49e-17	rs11205279	14724	GCST90274786	Protein S100-A12 levels	TRUE	reported
1	153359781	A	C	0.1602	0.0189	0.1077	2.33e-17	rs11205280	14723	GCST90274786	Protein S100-A12 levels	TRUE	reported
1	153360678	A	T	-0.1571	0.0189	0.8919	9.4e-17	rs4845541	14725	GCST90274786	Protein S100-A12 levels	TRUE	reported
1	153362146	T	C	-0.1569	0.0185	0.8884	2.23e-17	rs6659104	14738	GCST90274786	Protein S100-A12 levels	TRUE	reported
1	153362507	A	G	-0.1585	0.0185	0.8882	1.06e-17	rs3006488	14743	GCST90274786	Protein S100-A12 levels	TRUE	reported
1	153363105	T	C	-0.1585	0.0188	0.8901	3.43e-17	rs3795391	14726	GCST90274786	Protein S100-A12 levels	TRUE	reported
1	153364130	T	C	-0.1528	0.0186	0.8884	2.12e-16	rs3806232	14735	GCST90274786	Protein S100-A12 levels	TRUE	reported
1	153364662	T	C	0.1547	0.0188	0.1087	1.89e-16	rs11205281	14723	GCST90274786	Protein S100-A12 levels	TRUE	reported
1	153364926	T	G	0.1536	0.0188	0.1085	3.08e-16	rs61803339	14723	GCST90274786	Protein S100-A12 levels	TRUE	reported
1	153365310	T	C	-0.1536	0.0188	0.8913	3.08e-16	rs11205282	14723	GCST90274786	Protein S100-A12 levels	TRUE	reported
1	153365548	A	G	-0.1549	0.0188	0.8883	1.73e-16	rs12040625	14295	GCST90274786	Protein S100-A12 levels	TRUE	reported
1	153366361	A	T	0.1525	0.0186	0.1118	2.43e-16	rs12042217	14731	GCST90274786	Protein S100-A12 levels	TRUE	reported
1	153367113	A	G	-0.1525	0.0185	0.8881	1.68e-16	rs4845346	14732	GCST90274786	Protein S100-A12 levels	TRUE	reported
1	153368453	T	C	0.1552	0.0188	0.1085	1.51e-16	rs11578443	14723	GCST90274786	Protein S100-A12 levels	TRUE	reported
1	153369532	A	G	0.1552	0.0187	0.1114	1.05e-16	rs73018470	14295	GCST90274786	Protein S100-A12 levels	TRUE	reported
1	153369833	A	C	-0.1557	0.0187	0.8887	8.35e-17	rs61803340	14295	GCST90274786	Protein S100-A12 levels	TRUE	reported
1	153370085	T	G	0.1454	0.0197	0.1124	1.57e-13	rs58127527	12799	GCST90274786	Protein S100-A12 levels	TRUE	reported
1	153370659	C	G	-0.1529	0.0187	0.8883	2.92e-16	rs59678238	14295	GCST90274786	Protein S100-A12 levels	TRUE	reported
1	153370725	T	G	0.158	0.0188	0.1104	4.31e-17	rs57572338	14295	GCST90274786	Protein S100-A12 levels	TRUE	reported
1	153370876	A	G	0.1543	0.0187	0.1118	1.57e-16	rs12044231	14295	GCST90274786	Protein S100-A12 levels	TRUE	reported
1	153370917	T	C	0.1578	0.0188	0.1107	4.71e-17	rs6702735	14295	GCST90274786	Protein S100-A12 levels	TRUE	reported
1	153371085	A	G	0.1583	0.0188	0.1103	3.76e-17	rs6680386	14295	GCST90274786	Protein S100-A12 levels	TRUE	reported
1	153371544	A	G	0.1584	0.0191	0.1069	1.1e-16	rs61803108	14295	GCST90274786	Protein S100-A12 levels	TRUE	reported
1	153371601	T	C	-0.154	0.0188	0.8898	2.58e-16	rs4355996	14295	GCST90274786	Protein S100-A12 levels	TRUE	reported
1	153371995	A	T	-0.1547	0.0189	0.8912	2.72e-16	rs61803109	14295	GCST90274786	Protein S100-A12 levels	TRUE	reported
1	153372119	T	G	0.1565	0.0188	0.11	8.47e-17	rs61803110	14295	GCST90274786	Protein S100-A12 levels	TRUE	reported
1	153372890	T	C	0.1522	0.0186	0.1114	2.77e-16	rs61803111	14295	GCST90274786	Protein S100-A12 levels	TRUE	reported
1	153372896	A	G	-0.156	0.0187	0.8892	7.29e-17	rs61803112	14295	GCST90274786	Protein S100-A12 levels	TRUE	reported
1	153374406	T	TC	0.1531	0.0213	0.1118	6.58e-13	rs113420049	10894	GCST90274786	Protein S100-A12 levels	TRUE	reported
1	153374608	T	C	-0.1547	0.0187	0.8888	1.31e-16	rs59655855	14295	GCST90274786	Protein S100-A12 levels	TRUE	reported
1	153375455	T	TTC	0.1572	0.0214	0.1109	2.05e-13	rs112955890	10894	GCST90274786	Protein S100-A12 levels	TRUE	reported
1	153375736	T	C	-0.1527	0.0186	0.8885	2.22e-16	rs2148318	14295	GCST90274786	Protein S100-A12 levels	TRUE	reported
1	153376134	T	G	0.156	0.0188	0.1101	1.06e-16	rs6697489	14295	GCST90274786	Protein S100-A12 levels	TRUE	reported
1	153376145	T	C	0.1545	0.0187	0.111	1.43e-16	rs6673905	14294	GCST90274786	Protein S100-A12 levels	TRUE	reported
1	153376207	A	T	-0.1543	0.0187	0.8887	1.57e-16	rs6686657	14295	GCST90274786	Protein S100-A12 levels	TRUE	reported
1	153376350	A	C	-0.1525	0.0186	0.8882	2.43e-16	rs11205283	14295	GCST90274786	Protein S100-A12 levels	TRUE	reported
1	153376661	A	G	0.1542	0.0186	0.1113	1.13e-16	rs11205284	14295	GCST90274786	Protein S100-A12 levels	TRUE	reported
1	153376706	C	G	0.154	0.0186	0.1113	1.24e-16	rs11205285	14295	GCST90274786	Protein S100-A12 levels	TRUE	reported
1	153376727	CA	C	0.1511	0.0215	0.1104	2.1e-12	rs35036941	10894	GCST90274786	Protein S100-A12 levels	TRUE	reported
1	153376743	A	G	-0.1535	0.0186	0.8879	1.55e-16	rs11205286	14295	GCST90274786	Protein S100-A12 levels	TRUE	reported
1	153376807	T	C	-0.1535	0.019	0.8922	6.53e-16	rs11205287	14295	GCST90274786	Protein S100-A12 levels	TRUE	reported
1	153376808	C	G	0.1537	0.019	0.108	5.99e-16	rs11205288	14295	GCST90274786	Protein S100-A12 levels	TRUE	reported
1	153376880	T	C	0.1555	0.0187	0.1113	9.14e-17	rs12029448	14295	GCST90274786	Protein S100-A12 levels	TRUE	reported
1	153376986	T	C	-0.1542	0.0186	0.8887	1.13e-16	rs12047833	14295	GCST90274786	Protein S100-A12 levels	TRUE	reported
1	153377139	CA	C	0.1546	0.0213	0.1118	3.92e-13	rs397938315	10894	GCST90274786	Protein S100-A12 levels	TRUE	reported
1	153377319	A	C	0.1543	0.0186	0.1114	1.08e-16	rs11580424	14295	GCST90274786	Protein S100-A12 levels	TRUE	reported
1	153377503	T	C	0.1538	0.0186	0.1112	1.35e-16	rs11580467	14295	GCST90274786	Protein S100-A12 levels	TRUE	reported
1	153377806	A	G	0.16	0.0205	0.1068	5.96e-15	rs4845347	12412	GCST90274786	Protein S100-A12 levels	TRUE	reported
1	153378302	A	G	-0.1567	0.0201	0.8906	6.39e-15	rs11205291	12412	GCST90274786	Protein S100-A12 levels	TRUE	reported
1	153378311	C	G	0.1572	0.0201	0.1094	5.24e-15	rs11205292	12412	GCST90274786	Protein S100-A12 levels	TRUE	reported
1	153378583	T	C	0.1542	0.0187	0.1112	1.64e-16	rs11205293	14295	GCST90274786	Protein S100-A12 levels	TRUE	reported
1	153378954	A	G	0.3114	0.0642	0.989	1.23e-06	rs141687456	13808	GCST90274786	Protein S100-A12 levels	TRUE	reported
1	153379075	T	C	-0.3667	0.0699	0.0097	1.55e-07	rs141783966	13164	GCST90274786	Protein S100-A12 levels	TRUE	reported
1	153382458	C	G	-0.1544	0.0188	0.8883	2.16e-16	rs74436639	14295	GCST90274786	Protein S100-A12 levels	TRUE	reported
1	153382941	T	C	-0.1546	0.0188	0.8883	1.98e-16	rs11590633	14294	GCST90274786	Protein S100-A12 levels	TRUE	reported
1	153384007	A	C	-0.1613	0.0205	0.892	3.6e-15	rs141480445	12412	GCST90274786	Protein S100-A12 levels	TRUE	reported
1	153384077	C	G	0.1546	0.0191	0.1086	5.76e-16	rs78973836	14295	GCST90274786	Protein S100-A12 levels	TRUE	reported
1	153384184	A	G	-0.1576	0.019	0.8898	1.09e-16	rs78310409	14295	GCST90274786	Protein S100-A12 levels	TRUE	reported
1	153384716	A	G	0.1582	0.0207	0.1089	2.13e-14	rs61803116	12412	GCST90274786	Protein S100-A12 levels	TRUE	reported
1	153385086	A	T	-0.1573	0.0189	0.8896	8.59e-17	rs4845543	14295	GCST90274786	Protein S100-A12 levels	TRUE	reported
1	153386555	CT	C	0.1558	0.0217	0.1104	6.99e-13	rs145601987	10894	GCST90274786	Protein S100-A12 levels	TRUE	reported
1	153387260	A	G	0.1553	0.019	0.1099	2.99e-16	rs11579041	14295	GCST90274786	Protein S100-A12 levels	TRUE	reported
1	153388190	T	G	0.1568	0.0209	0.1119	6.27e-14	rs56048640	11768	GCST90274786	Protein S100-A12 levels	TRUE	reported
1	153388881	A	C	-0.1513	0.0188	0.8878	8.42e-16	rs3014812	14295	GCST90274786	Protein S100-A12 levels	TRUE	reported
1	153389589	A	G	0.1527	0.0191	0.1088	1.3e-15	rs41264640	14295	GCST90274786	Protein S100-A12 levels	TRUE	reported
1	153390202	T	G	0.1501	0.0194	0.1069	1.02e-14	rs61803119	14295	GCST90274786	Protein S100-A12 levels	TRUE	reported
1	153390245	T	C	-0.128	0.0204	0.9036	3.51e-10	rs4845348	14295	GCST90274786	Protein S100-A12 levels	TRUE	reported
1	153391786	T	C	-0.0947	0.0207	0.9109	4.76e-06	rs3014813	14731	GCST90274786	Protein S100-A12 levels	TRUE	reported
1	153392042	A	C	-0.095	0.0207	0.911	4.45e-06	rs3006415	14731	GCST90274786	Protein S100-A12 levels	TRUE	reported
1	153392302	T	G	0.0966	0.0208	0.0881	3.41e-06	rs3006416	14731	GCST90274786	Protein S100-A12 levels	TRUE	reported
1	153400195	T	C	0.1903	0.0408	0.023	3.1e-06	rs139529513	14741	GCST90274786	Protein S100-A12 levels	TRUE	reported
1	153400672	A	T	0.0966	0.0206	0.0907	2.74e-06	rs3006422	14743	GCST90274786	Protein S100-A12 levels	TRUE	reported
1	153400685	A	G	0.1414	0.0281	0.0479	4.85e-07	rs4507965	14732	GCST90274786	Protein S100-A12 levels	TRUE	reported
1	153403487	A	G	-0.1155	0.0239	0.9339	1.35e-06	rs77140629	14742	GCST90274786	Protein S100-A12 levels	TRUE	reported
1	153403605	A	G	-0.1178	0.024	0.9343	9.19e-07	rs76334490	14743	GCST90274786	Protein S100-A12 levels	TRUE	reported
1	153403648	T	C	0.1188	0.024	0.0657	7.42e-07	rs116024863	14743	GCST90274786	Protein S100-A12 levels	TRUE	reported
1	153403660	T	C	-0.1218	0.0243	0.933	5.38e-07	rs80031604	13868	GCST90274786	Protein S100-A12 levels	TRUE	reported
1	153404672	T	C	-0.3471	0.0695	0.0093	5.91e-07	rs147912806	13808	GCST90274786	Protein S100-A12 levels	TRUE	reported
1	153404808	T	C	-0.1192	0.0239	0.9343	6.12e-07	rs16835308	14743	GCST90274786	Protein S100-A12 levels	TRUE	reported
1	153405150	T	C	0.1206	0.0241	0.0651	5.61e-07	rs147737149	14743	GCST90274786	Protein S100-A12 levels	TRUE	reported
1	153406561	A	G	0.1181	0.0239	0.0664	7.76e-07	rs10888560	14740	GCST90274786	Protein S100-A12 levels	TRUE	reported
1	153407572	T	C	0.1182	0.0238	0.0687	6.82e-07	rs12043556	14742	GCST90274786	Protein S100-A12 levels	TRUE	reported
1	153459115	T	C	0.1809	0.038	0.0262	1.93e-06	rs76281252	14743	GCST90274786	Protein S100-A12 levels	TRUE	reported
1	245480237	C	G	-0.1188	0.0258	0.0622	4.13e-06	rs59538998	14295	GCST90274786	Protein S100-A12 levels	TRUE	reported
2	61077181	A	C	0.4529	0.099	0.0071	4.77e-06	rs192066474	8717	GCST90274786	Protein S100-A12 levels	TRUE	reported
2	125135549	T	C	-0.0612	0.0133	0.7267	4.19e-06	rs11884566	14295	GCST90274786	Protein S100-A12 levels	TRUE	reported
2	125135589	T	C	-0.0622	0.0133	0.7266	2.92e-06	rs13384799	14295	GCST90274786	Protein S100-A12 levels	TRUE	reported
2	142499805	G	GT	0.0667	0.0138	0.5473	1.34e-06	rs71301751	10894	GCST90274786	Protein S100-A12 levels	TRUE	reported
2	142499824	CT	C	0.0655	0.0138	0.5473	2.07e-06	rs34084336	10894	GCST90274786	Protein S100-A12 levels	TRUE	reported
2	226154453	T	G	0.7662	0.1632	0.9956	2.67e-06	rs78369182	9365	GCST90274786	Protein S100-A12 levels	TRUE	reported
3	152573197	T	C	-0.0936	0.0203	0.0955	4.01e-06	rs56268787	14737	GCST90274786	Protein S100-A12 levels	TRUE	reported
3	152578125	T	C	-0.0932	0.0204	0.0953	4.91e-06	rs16864629	14737	GCST90274786	Protein S100-A12 levels	TRUE	reported
3	154211690	A	T	-0.5456	0.1148	0.9912	2.01e-06	rs79567999	10687	GCST90274786	Protein S100-A12 levels	TRUE	reported
3	174824333	A	C	0.194	0.0423	0.0217	4.51e-06	rs150015576	14740	GCST90274786	Protein S100-A12 levels	TRUE	reported
4	12920594	T	C	-0.0604	0.0119	0.613	3.86e-07	rs2056031	14739	GCST90274786	Protein S100-A12 levels	TRUE	reported
4	12921425	T	C	0.0549	0.012	0.3687	4.76e-06	rs2056027	14739	GCST90274786	Protein S100-A12 levels	TRUE	reported
4	12921594	A	C	-0.055	0.012	0.631	4.58e-06	rs1913419	14739	GCST90274786	Protein S100-A12 levels	TRUE	reported
4	12921839	A	G	-0.055	0.012	0.6305	4.58e-06	rs1877684	14736	GCST90274786	Protein S100-A12 levels	TRUE	reported
4	12922504	T	C	-0.0595	0.0119	0.6133	5.73e-07	rs1513957	14741	GCST90274786	Protein S100-A12 levels	TRUE	reported
4	12923176	T	C	-0.0597	0.0119	0.6133	5.25e-07	rs1399023	14741	GCST90274786	Protein S100-A12 levels	TRUE	reported
4	12923804	T	G	0.0548	0.012	0.3685	4.96e-06	rs11945544	14741	GCST90274786	Protein S100-A12 levels	TRUE	reported
4	12924755	C	G	0.0549	0.012	0.3685	4.76e-06	rs741311	14741	GCST90274786	Protein S100-A12 levels	TRUE	reported
4	12928197	T	C	0.0594	0.0119	0.3861	5.99e-07	rs4834855	14742	GCST90274786	Protein S100-A12 levels	TRUE	reported
4	44544893	A	AG	0.3088	0.0659	0.9878	2.79e-06	rs372393276	10894	GCST90274786	Protein S100-A12 levels	TRUE	reported
4	166290428	A	G	0.5224	0.0953	0.9921	4.21e-08	rs72631700	11410	GCST90274786	Protein S100-A12 levels	TRUE	reported
4	171344195	T	C	-0.3334	0.0721	0.017	3.76e-06	rs28469768	10794	GCST90274786	Protein S100-A12 levels	TRUE	reported
4	171351906	A	C	-0.3348	0.0722	0.0171	3.53e-06	rs72986802	10794	GCST90274786	Protein S100-A12 levels	TRUE	reported
4	171355214	T	G	-0.3523	0.0765	0.0175	4.12e-06	rs60690551	8911	GCST90274786	Protein S100-A12 levels	TRUE	reported
6	109107769	A	G	0.9076	0.1875	0.0032	1.29e-06	rs150932141	6834	GCST90274786	Protein S100-A12 levels	TRUE	reported
7	75133433	A	C	0.3059	0.0665	0.983	4.22e-06	rs191808657	12412	GCST90274786	Protein S100-A12 levels	TRUE	reported
7	124061477	A	C	-0.3381	0.0722	0.9894	2.83e-06	rs189488881	13421	GCST90274786	Protein S100-A12 levels	TRUE	reported
8	18629032	A	G	0.4374	0.0948	0.0105	3.95e-06	rs187184138	9361	GCST90274786	Protein S100-A12 levels	TRUE	reported
8	35456586	A	G	-0.7703	0.1621	0.0077	2.01e-06	rs138510787	8147	GCST90274786	Protein S100-A12 levels	TRUE	reported
8	98387791	T	G	0.6974	0.1444	0.994	1.37e-06	rs138601213	6070	GCST90274786	Protein S100-A12 levels	TRUE	reported
8	123985708	A	G	0.0555	0.0118	0.5633	2.56e-06	rs3802266	14740	GCST90274786	Protein S100-A12 levels	TRUE	reported
8	123986649	A	G	0.0548	0.0118	0.5618	3.42e-06	rs2833	14739	GCST90274786	Protein S100-A12 levels	TRUE	reported
9	246556	A	G	-0.6862	0.1483	0.9962	3.71e-06	rs536486631	7843	GCST90274786	Protein S100-A12 levels	TRUE	reported
9	2429554	T	C	-0.5141	0.1118	0.0067	4.26e-06	rs139570778	7843	GCST90274786	Protein S100-A12 levels	TRUE	reported
11	31879143	A	G	-0.2529	0.0534	0.0156	2.18e-06	rs78800546	14295	GCST90274786	Protein S100-A12 levels	TRUE	reported
11	31967679	T	C	0.2617	0.0559	0.9844	2.85e-06	rs182114048	12799	GCST90274786	Protein S100-A12 levels	TRUE	reported
12	96571503	T	C	0.1884	0.0407	0.0246	3.67e-06	rs112956934	14737	GCST90274786	Protein S100-A12 levels	TRUE	reported
14	59959160	A	C	-0.1299	0.0274	0.9495	2.13e-06	rs10483716	14734	GCST90274786	Protein S100-A12 levels	TRUE	reported
14	59990514	T	C	-0.1396	0.0293	0.9492	1.89e-06	rs112988802	12851	GCST90274786	Protein S100-A12 levels	TRUE	reported
14	79685510	A	G	0.5788	0.1231	0.0093	2.58e-06	rs77481677	5561	GCST90274786	Protein S100-A12 levels	TRUE	reported
16	4602209	A	G	0.1806	0.0345	0.0379	1.65e-07	rs147302029	13649	GCST90274786	Protein S100-A12 levels	TRUE	reported
16	8702137	C	G	-0.1505	0.0329	0.9548	4.77e-06	rs117094746	11787	GCST90274786	Protein S100-A12 levels	TRUE	reported
18	21737583	CCGGCACTTG	C	-0.6051	0.1302	0.0036	3.36e-06	rs397783959	8911	GCST90274786	Protein S100-A12 levels	TRUE	reported
19	4247567	C	G	0.0865	0.0183	0.191	2.28e-06	rs138439507	11537	GCST90274786	Protein S100-A12 levels	TRUE	reported
20	43028037	A	G	-0.0583	0.0123	0.3511	2.14e-06	rs2425640	14741	GCST90274786	Protein S100-A12 levels	TRUE	reported
21	39446977	CA	C	-0.0828	0.0172	0.2656	1.48e-06	rs397691913	10894	GCST90274786	Protein S100-A12 levels	TRUE	reported
22	17405275	T	C	-0.2067	0.0436	0.9765	2.13e-06	rs73145651	13826	GCST90274786	Protein S100-A12 levels	TRUE	reported
22	17406250	T	C	0.2064	0.0425	0.0239	1.19e-06	rs55783131	14728	GCST90274786	Protein S100-A12 levels	TRUE	reported
22	17411269	CTG	C	-0.227	0.0481	0.9758	2.37e-06	rs149759571	11329	GCST90274786	Protein S100-A12 levels	TRUE	reported
22	18016508	A	G	-0.0561	0.0121	0.3737	3.55e-06	rs174335	14741	GCST90274786	Protein S100-A12 levels	TRUE	reported
22	18032226	A	G	0.0617	0.0125	0.6296	7.97e-07	rs174344	14295	GCST90274786	Protein S100-A12 levels	TRUE	reported
1	115986244	A	G	-0.7578	0.1566	0.9941	1.3e-06	rs180858020	6780	GCST90274789	Fibroblast growth factor 23 levels	TRUE	reported
1	146522606	T	C	0.0706	0.0136	0.7496	2.09e-07	rs521687	14286	GCST90274789	Fibroblast growth factor 23 levels	TRUE	reported
1	146522686	T	C	-0.0656	0.0141	0.2288	3.28e-06	rs522558	14287	GCST90274789	Fibroblast growth factor 23 levels	TRUE	reported
1	146522722	T	C	0.0708	0.0136	0.7502	1.93e-07	rs671205	14287	GCST90274789	Fibroblast growth factor 23 levels	TRUE	reported
1	196617720	A	G	0.4034	0.0882	0.0089	4.79e-06	rs76978022	11094	GCST90274789	Fibroblast growth factor 23 levels	TRUE	reported
1	196621053	T	C	-0.4012	0.0872	0.9911	4.21e-06	rs35836460	11094	GCST90274789	Fibroblast growth factor 23 levels	TRUE	reported
1	215797147	A	C	0.2816	0.0616	0.9858	4.84e-06	rs189905207	13987	GCST90274789	Fibroblast growth factor 23 levels	TRUE	reported
2	49432963	A	C	0.4796	0.104	0.0134	4e-06	rs192191739	7727	GCST90274789	Fibroblast growth factor 23 levels	TRUE	reported
2	121959869	A	G	-0.1354	0.0291	0.0487	3.27e-06	rs11685074	14287	GCST90274789	Fibroblast growth factor 23 levels	TRUE	reported
2	121962947	T	G	0.0941	0.0185	0.8733	3.65e-07	rs6753743	14287	GCST90274789	Fibroblast growth factor 23 levels	TRUE	reported
2	121963090	C	G	-0.0929	0.0185	0.1274	5.12e-07	rs34602077	14287	GCST90274789	Fibroblast growth factor 23 levels	TRUE	reported
2	180013786	CAAAAAAAAAAAAA	C	-0.0699	0.0152	0.3589	4.25e-06	rs573823940	10893	GCST90274789	Fibroblast growth factor 23 levels	TRUE	reported
2	190368358	A	G	0.0588	0.0128	0.3131	4.35e-06	rs12465339	14287	GCST90274789	Fibroblast growth factor 23 levels	TRUE	reported
2	190368991	A	T	0.0637	0.0137	0.3143	3.33e-06	rs4667285	12403	GCST90274789	Fibroblast growth factor 23 levels	TRUE	reported
2	190371286	C	G	0.0623	0.0128	0.3129	1.13e-06	rs920266	14287	GCST90274789	Fibroblast growth factor 23 levels	TRUE	reported
2	190371722	T	C	-0.0704	0.0134	0.7364	1.49e-07	rs10189190	14287	GCST90274789	Fibroblast growth factor 23 levels	TRUE	reported
2	190371812	T	TA	0.0796	0.0152	0.269	1.63e-07	rs397736220	10893	GCST90274789	Fibroblast growth factor 23 levels	TRUE	reported
2	190372156	CA	C	-0.0754	0.015	0.7078	4.99e-07	rs397949345	10893	GCST90274789	Fibroblast growth factor 23 levels	TRUE	reported
2	190372919	T	C	-0.0698	0.0134	0.7358	1.9e-07	rs2119070	14287	GCST90274789	Fibroblast growth factor 23 levels	TRUE	reported
2	190375710	T	G	0.0608	0.0127	0.2661	1.69e-06	rs35000023	14734	GCST90274789	Fibroblast growth factor 23 levels	TRUE	reported
2	190376247	CT	C	-0.0751	0.0153	0.6734	9.18e-07	rs34899118	10893	GCST90274789	Fibroblast growth factor 23 levels	TRUE	reported
2	190376493	A	G	-0.0604	0.0127	0.7347	1.98e-06	rs11680808	14734	GCST90274789	Fibroblast growth factor 23 levels	TRUE	reported
2	190377894	T	C	0.0612	0.0127	0.2654	1.44e-06	rs11694976	14733	GCST90274789	Fibroblast growth factor 23 levels	TRUE	reported
2	190378371	C	G	-0.061	0.0127	0.7345	1.56e-06	rs17198934	14734	GCST90274789	Fibroblast growth factor 23 levels	TRUE	reported
2	190383525	T	C	0.0595	0.0127	0.2654	2.8e-06	rs62184660	14731	GCST90274789	Fibroblast growth factor 23 levels	TRUE	reported
2	190386579	T	G	0.0598	0.0127	0.2654	2.49e-06	rs11677198	14729	GCST90274789	Fibroblast growth factor 23 levels	TRUE	reported
2	190387243	T	C	-0.0596	0.0127	0.7346	2.69e-06	rs17198955	14731	GCST90274789	Fibroblast growth factor 23 levels	TRUE	reported
2	190388444	A	C	-0.0595	0.0127	0.7341	2.8e-06	rs11691332	14731	GCST90274789	Fibroblast growth factor 23 levels	TRUE	reported
2	190389720	C	G	-0.0604	0.0127	0.7353	1.98e-06	rs13027987	14729	GCST90274789	Fibroblast growth factor 23 levels	TRUE	reported
2	190389803	T	C	0.0597	0.0127	0.265	2.59e-06	rs17271134	14731	GCST90274789	Fibroblast growth factor 23 levels	TRUE	reported
2	190390506	A	C	0.0592	0.0127	0.2647	3.14e-06	rs13029665	14731	GCST90274789	Fibroblast growth factor 23 levels	TRUE	reported
2	190391921	A	C	-0.0605	0.0127	0.735	1.9e-06	rs35078179	14731	GCST90274789	Fibroblast growth factor 23 levels	TRUE	reported
2	190395060	T	C	-0.0611	0.0127	0.7341	1.5e-06	rs35209105	14734	GCST90274789	Fibroblast growth factor 23 levels	TRUE	reported
2	190395126	A	T	0.0614	0.0127	0.266	1.33e-06	rs13018571	14734	GCST90274789	Fibroblast growth factor 23 levels	TRUE	reported
2	190396659	T	C	-0.0607	0.0127	0.7338	1.76e-06	rs726093	14733	GCST90274789	Fibroblast growth factor 23 levels	TRUE	reported
2	190397020	T	C	-0.0608	0.0128	0.7353	2.03e-06	rs13032311	14735	GCST90274789	Fibroblast growth factor 23 levels	TRUE	reported
2	190397021	A	G	0.0594	0.0128	0.264	3.47e-06	rs66883355	14732	GCST90274789	Fibroblast growth factor 23 levels	TRUE	reported
2	190397435	T	G	0.0694	0.015	0.2567	3.72e-06	rs34783775	11334	GCST90274789	Fibroblast growth factor 23 levels	TRUE	reported
2	190397484	A	G	0.0621	0.0129	0.2624	1.48e-06	rs13007486	14697	GCST90274789	Fibroblast growth factor 23 levels	TRUE	reported
2	190401523	T	C	-0.0637	0.0128	0.7342	6.47e-07	rs11682165	14728	GCST90274789	Fibroblast growth factor 23 levels	TRUE	reported
2	190401729	C	G	-0.0625	0.0128	0.7347	1.05e-06	rs11677494	14729	GCST90274789	Fibroblast growth factor 23 levels	TRUE	reported
2	190404237	A	T	0.0624	0.0128	0.2691	1.09e-06	rs1469967	14727	GCST90274789	Fibroblast growth factor 23 levels	TRUE	reported
2	190407122	G	GT	-0.076	0.0141	0.5828	7.04e-08	rs148918952	10893	GCST90274789	Fibroblast growth factor 23 levels	TRUE	reported
2	190409990	G	GCC	0.0793	0.0139	0.3847	1.16e-08	rs34810543	10893	GCST90274789	Fibroblast growth factor 23 levels	TRUE	reported
2	190412377	A	G	0.0705	0.0127	0.2646	2.84e-08	rs11685197	14734	GCST90274789	Fibroblast growth factor 23 levels	TRUE	reported
2	190422058	A	AG	0.0779	0.0144	0.2668	6.31e-08	rs34200358	11332	GCST90274789	Fibroblast growth factor 23 levels	TRUE	reported
2	190423672	CAACA	C	0.0759	0.0139	0.3707	4.75e-08	rs140437601	10893	GCST90274789	Fibroblast growth factor 23 levels	TRUE	reported
2	190423785	T	C	0.0612	0.0122	0.369	5.27e-07	rs2352262	14287	GCST90274789	Fibroblast growth factor 23 levels	TRUE	reported
2	190424842	C	G	0.0665	0.0126	0.2711	1.31e-07	rs11884632	14726	GCST90274789	Fibroblast growth factor 23 levels	TRUE	reported
2	190429181	T	C	-0.1199	0.0187	0.7431	1.44e-10	rs4508635	7423	GCST90274789	Fibroblast growth factor 23 levels	TRUE	reported
2	190429545	A	G	-0.0614	0.0121	0.6126	3.89e-07	rs12468999	14287	GCST90274789	Fibroblast growth factor 23 levels	TRUE	reported
2	190430177	A	G	0.0606	0.012	0.3863	4.42e-07	rs2304704	14287	GCST90274789	Fibroblast growth factor 23 levels	TRUE	reported
2	190430731	A	G	0.0592	0.0121	0.386	9.95e-07	rs57782175	14287	GCST90274789	Fibroblast growth factor 23 levels	TRUE	reported
2	190432277	C	G	0.0608	0.0121	0.3864	5.04e-07	rs4145237	14287	GCST90274789	Fibroblast growth factor 23 levels	TRUE	reported
2	190432467	T	C	-0.0736	0.0126	0.7267	5.18e-09	rs994227	14724	GCST90274789	Fibroblast growth factor 23 levels	TRUE	reported
2	190432985	T	C	-0.0646	0.0128	0.5934	4.49e-07	rs112257498	12403	GCST90274789	Fibroblast growth factor 23 levels	TRUE	reported
2	190434720	A	ATATG	0.0785	0.0142	0.2737	3.24e-08	rs66749770	11330	GCST90274789	Fibroblast growth factor 23 levels	TRUE	reported
2	190436172	A	T	0.0777	0.0137	0.4159	1.42e-08	rs1371467	11537	GCST90274789	Fibroblast growth factor 23 levels	TRUE	reported
2	190440354	A	G	0.074	0.0125	0.2728	3.22e-09	rs11690401	14728	GCST90274789	Fibroblast growth factor 23 levels	TRUE	reported
2	190440548	T	G	-0.0743	0.0125	0.7267	2.78e-09	rs1439812	14728	GCST90274789	Fibroblast growth factor 23 levels	TRUE	reported
2	190440628	T	C	-0.0739	0.0125	0.7267	3.38e-09	rs11689103	14728	GCST90274789	Fibroblast growth factor 23 levels	TRUE	reported
2	190440809	T	C	-0.0679	0.0126	0.724	7.09e-08	rs34206448	14733	GCST90274789	Fibroblast growth factor 23 levels	TRUE	reported
2	190441286	T	C	0.0648	0.0121	0.3287	8.54e-08	rs7586757	14731	GCST90274789	Fibroblast growth factor 23 levels	TRUE	reported
2	190441317	A	G	-0.059	0.012	0.6519	8.8e-07	rs2882877	14717	GCST90274789	Fibroblast growth factor 23 levels	TRUE	reported
2	190441454	T	C	0.0728	0.0128	0.2668	1.29e-08	rs996425	14730	GCST90274789	Fibroblast growth factor 23 levels	TRUE	reported
2	190441491	A	C	-0.0726	0.0128	0.7331	1.41e-08	rs996426	14730	GCST90274789	Fibroblast growth factor 23 levels	TRUE	reported
2	190442152	T	G	0.0656	0.0116	0.4006	1.56e-08	rs10188785	14725	GCST90274789	Fibroblast growth factor 23 levels	TRUE	reported
2	190442231	C	G	-0.0827	0.0119	0.5404	3.66e-12	rs1821987	14287	GCST90274789	Fibroblast growth factor 23 levels	TRUE	reported
2	190443445	T	C	-0.0884	0.0126	0.7251	2.29e-12	rs35623329	14733	GCST90274789	Fibroblast growth factor 23 levels	TRUE	reported
2	190445848	A	G	-0.1078	0.0132	0.722	3.17e-16	rs12693542	14287	GCST90274789	Fibroblast growth factor 23 levels	TRUE	reported
2	190445936	T	C	-0.0936	0.0121	0.6046	1.03e-14	rs13015236	14287	GCST90274789	Fibroblast growth factor 23 levels	TRUE	reported
2	190446541	C	G	0.1163	0.0131	0.2897	6.82e-19	rs3811621	14286	GCST90274789	Fibroblast growth factor 23 levels	TRUE	reported
2	190447811	T	C	-0.0993	0.0119	0.568	7.15e-17	rs17198983	14286	GCST90274789	Fibroblast growth factor 23 levels	TRUE	reported
2	190449370	A	C	-0.0971	0.0119	0.5699	3.36e-16	rs6712505	14287	GCST90274789	Fibroblast growth factor 23 levels	TRUE	reported
2	190450880	A	C	0.0986	0.0119	0.4293	1.17e-16	rs13012833	14286	GCST90274789	Fibroblast growth factor 23 levels	TRUE	reported
2	190451801	T	C	-0.1092	0.0132	0.7253	1.31e-16	rs17198990	14287	GCST90274789	Fibroblast growth factor 23 levels	TRUE	reported
2	190452068	T	G	0.1097	0.0132	0.2747	9.52e-17	rs71434664	14286	GCST90274789	Fibroblast growth factor 23 levels	TRUE	reported
2	190452748	A	C	-0.1122	0.013	0.7085	6.09e-18	rs6706281	14287	GCST90274789	Fibroblast growth factor 23 levels	TRUE	reported
2	190452957	T	G	-0.1111	0.0131	0.7236	2.23e-17	rs17199004	14287	GCST90274789	Fibroblast growth factor 23 levels	TRUE	reported
2	190454733	A	G	-0.1099	0.0131	0.7244	4.89e-17	rs6743001	14286	GCST90274789	Fibroblast growth factor 23 levels	TRUE	reported
2	190454975	A	C	0.1128	0.014	0.2868	7.81e-16	rs6434350	12403	GCST90274789	Fibroblast growth factor 23 levels	TRUE	reported
2	190454976	A	G	-0.113	0.014	0.7145	6.95e-16	rs6434351	12403	GCST90274789	Fibroblast growth factor 23 levels	TRUE	reported
2	190455421	T	G	0.1094	0.0131	0.2761	6.76e-17	rs6715669	14287	GCST90274789	Fibroblast growth factor 23 levels	TRUE	reported
2	190455564	A	G	0.1097	0.0131	0.2754	5.57e-17	rs6715900	14287	GCST90274789	Fibroblast growth factor 23 levels	TRUE	reported
2	190455967	T	C	-0.0921	0.0113	0.5709	3.63e-16	rs12465298	14731	GCST90274789	Fibroblast growth factor 23 levels	TRUE	reported
2	190456389	T	C	0.1097	0.0131	0.2758	5.57e-17	rs10931425	14287	GCST90274789	Fibroblast growth factor 23 levels	TRUE	reported
2	190456396	A	G	-0.0916	0.0113	0.5707	5.22e-16	rs2352270	14728	GCST90274789	Fibroblast growth factor 23 levels	TRUE	reported
2	190457146	A	G	-0.11	0.0131	0.7242	4.58e-17	rs34001547	14286	GCST90274789	Fibroblast growth factor 23 levels	TRUE	reported
2	190457664	A	G	-0.1099	0.0131	0.7246	4.89e-17	rs7603186	14287	GCST90274789	Fibroblast growth factor 23 levels	TRUE	reported
2	190458773	A	G	0.0924	0.0113	0.4294	2.91e-16	rs1437885	14728	GCST90274789	Fibroblast growth factor 23 levels	TRUE	reported
2	190459315	A	G	-0.1113	0.013	0.7102	1.11e-17	rs1437884	14286	GCST90274789	Fibroblast growth factor 23 levels	TRUE	reported
2	190459468	A	G	-0.1099	0.013	0.7142	2.82e-17	rs1437883	14287	GCST90274789	Fibroblast growth factor 23 levels	TRUE	reported
2	190459793	A	T	0.1099	0.013	0.2852	2.82e-17	rs10206897	14287	GCST90274789	Fibroblast growth factor 23 levels	TRUE	reported
2	190461543	A	G	-0.1041	0.0118	0.5709	1.12e-18	rs6718734	14287	GCST90274789	Fibroblast growth factor 23 levels	TRUE	reported
2	190463032	A	G	0.1029	0.0118	0.4248	2.77e-18	rs1370593	14287	GCST90274789	Fibroblast growth factor 23 levels	TRUE	reported
2	190464736	A	G	-0.1034	0.0118	0.5712	1.91e-18	rs6733858	14287	GCST90274789	Fibroblast growth factor 23 levels	TRUE	reported
2	190465696	A	T	-0.1023	0.0118	0.5759	4.34e-18	rs11694919	14287	GCST90274789	Fibroblast growth factor 23 levels	TRUE	reported
2	190466451	T	C	0.1077	0.0131	0.2759	2.01e-16	rs17271183	14286	GCST90274789	Fibroblast growth factor 23 levels	TRUE	reported
2	190466796	A	G	-0.1042	0.0118	0.5707	1.04e-18	rs6741965	14287	GCST90274789	Fibroblast growth factor 23 levels	TRUE	reported
2	190467942	A	C	-0.1033	0.0119	0.5715	3.93e-18	rs12619013	14287	GCST90274789	Fibroblast growth factor 23 levels	TRUE	reported
2	190468920	T	G	-0.1012	0.0119	0.5762	1.83e-17	rs1347708	14286	GCST90274789	Fibroblast growth factor 23 levels	TRUE	reported
2	190471786	T	C	-0.0676	0.0143	0.8079	2.28e-06	rs17271204	14717	GCST90274789	Fibroblast growth factor 23 levels	TRUE	reported
2	190471946	T	C	-0.0669	0.0115	0.6155	5.98e-09	rs12986707	14722	GCST90274789	Fibroblast growth factor 23 levels	TRUE	reported
2	190472176	T	G	0.0734	0.0122	0.3014	1.78e-09	rs10188692	14732	GCST90274789	Fibroblast growth factor 23 levels	TRUE	reported
2	190474215	A	ATGTGTGTGTGTG	0.085	0.0161	0.1935	1.3e-07	rs71021001	11333	GCST90274789	Fibroblast growth factor 23 levels	TRUE	reported
2	190477085	C	G	-0.0617	0.012	0.6697	2.72e-07	rs1898558	14718	GCST90274789	Fibroblast growth factor 23 levels	TRUE	reported
2	190479806	A	T	0.0609	0.0118	0.3511	2.46e-07	rs7580851	14724	GCST90274789	Fibroblast growth factor 23 levels	TRUE	reported
2	190479942	G	GGT	0.0685	0.0144	0.4038	1.97e-06	rs397820517	10893	GCST90274789	Fibroblast growth factor 23 levels	TRUE	reported
2	190482118	A	AT	0.0716	0.0145	0.257	7.9e-07	rs34294190	11339	GCST90274789	Fibroblast growth factor 23 levels	TRUE	reported
2	190483197	A	T	-0.0578	0.0117	0.6484	7.81e-07	rs2099608	14732	GCST90274789	Fibroblast growth factor 23 levels	TRUE	reported
2	190484362	G	GT	-0.0719	0.0146	0.7467	8.45e-07	rs34016376	11329	GCST90274789	Fibroblast growth factor 23 levels	TRUE	reported
2	190486244	T	C	0.0578	0.0117	0.3512	7.81e-07	rs13025114	14733	GCST90274789	Fibroblast growth factor 23 levels	TRUE	reported
4	40141421	CT	C	0.0709	0.0155	0.2227	4.78e-06	rs34370849	11333	GCST90274789	Fibroblast growth factor 23 levels	TRUE	reported
4	40142535	T	C	0.0685	0.0144	0.2406	1.97e-06	rs794007	12844	GCST90274789	Fibroblast growth factor 23 levels	TRUE	reported
4	40142741	A	G	0.0662	0.0144	0.2321	4.28e-06	rs794006	12845	GCST90274789	Fibroblast growth factor 23 levels	TRUE	reported
4	40142944	C	G	-0.066	0.0144	0.771	4.58e-06	rs794005	12844	GCST90274789	Fibroblast growth factor 23 levels	TRUE	reported
4	124325226	A	T	-0.1845	0.0389	0.9748	2.11e-06	rs11930290	12848	GCST90274789	Fibroblast growth factor 23 levels	TRUE	reported
5	10516533	CA	C	-0.0689	0.0145	0.6505	2.02e-06	rs541206510	10893	GCST90274789	Fibroblast growth factor 23 levels	TRUE	reported
5	146629145	A	G	0.1704	0.0348	0.0295	9.75e-07	rs34551523	14730	GCST90274789	Fibroblast growth factor 23 levels	TRUE	reported
5	146646198	A	G	-0.1641	0.0353	0.9706	3.34e-06	rs71580435	14732	GCST90274789	Fibroblast growth factor 23 levels	TRUE	reported
5	176814656	A	G	-0.0653	0.0135	0.2766	1.32e-06	rs33921462	14287	GCST90274789	Fibroblast growth factor 23 levels	TRUE	reported
6	31175118	A	C	-0.2224	0.0479	0.0191	3.43e-06	rs181409232	12846	GCST90274789	Fibroblast growth factor 23 levels	TRUE	reported
6	81343345	A	G	-0.0768	0.0166	0.8634	3.72e-06	rs12195292	14710	GCST90274789	Fibroblast growth factor 23 levels	TRUE	reported
7	12540548	C	G	0.1059	0.0222	0.1002	1.84e-06	rs370203222	11759	GCST90274789	Fibroblast growth factor 23 levels	TRUE	reported
9	130115374	C	G	0.6205	0.1277	0.0054	1.18e-06	rs190596247	8749	GCST90274789	Fibroblast growth factor 23 levels	TRUE	reported
9	130118104	A	G	-0.6541	0.1291	0.995	4.05e-07	rs60098080	8749	GCST90274789	Fibroblast growth factor 23 levels	TRUE	reported
9	130120997	T	C	-0.5929	0.1271	0.9948	3.09e-06	rs117292792	8749	GCST90274789	Fibroblast growth factor 23 levels	TRUE	reported
9	130125329	A	G	0.5824	0.1268	0.0053	4.37e-06	rs117956325	8749	GCST90274789	Fibroblast growth factor 23 levels	TRUE	reported
11	42104969	A	G	1.1843	0.2411	0.005	9.01e-07	rs143478750	6259	GCST90274789	Fibroblast growth factor 23 levels	TRUE	reported
11	106531034	A	G	0.2362	0.0507	0.0187	3.18e-06	rs118177380	14287	GCST90274789	Fibroblast growth factor 23 levels	TRUE	reported
11	115871001	A	T	-0.415	0.089	0.0141	3.12e-06	rs75271339	9947	GCST90274789	Fibroblast growth factor 23 levels	TRUE	reported
12	4475933	C	G	0.0644	0.0134	0.2297	1.54e-06	rs10774225	14724	GCST90274789	Fibroblast growth factor 23 levels	TRUE	reported
12	4479549	A	G	-0.0959	0.0178	0.1141	7.14e-08	rs7955866	14719	GCST90274789	Fibroblast growth factor 23 levels	TRUE	reported
12	4481044	A	G	-0.0868	0.018	0.1114	1.42e-06	rs13312789	14721	GCST90274789	Fibroblast growth factor 23 levels	TRUE	reported
12	4484459	T	C	-0.0896	0.0178	0.115	4.81e-07	rs7976548	14726	GCST90274789	Fibroblast growth factor 23 levels	TRUE	reported
12	4485695	G	GT	0.0903	0.0197	0.8771	4.57e-06	rs140174060	11312	GCST90274789	Fibroblast growth factor 23 levels	TRUE	reported
12	4486682	T	C	-0.0858	0.0182	0.1287	2.43e-06	rs11063121	12839	GCST90274789	Fibroblast growth factor 23 levels	TRUE	reported
12	4487865	A	G	-0.0863	0.0173	0.1209	6.09e-07	rs11063123	14734	GCST90274789	Fibroblast growth factor 23 levels	TRUE	reported
12	4489235	T	C	0.0869	0.0175	0.8809	6.84e-07	rs3812822	14727	GCST90274789	Fibroblast growth factor 23 levels	TRUE	reported
12	4490845	A	C	-0.0645	0.0123	0.7078	1.57e-07	rs12812339	14727	GCST90274789	Fibroblast growth factor 23 levels	TRUE	reported
12	4491909	C	G	0.0636	0.012	0.3267	1.16e-07	rs6489536	14724	GCST90274789	Fibroblast growth factor 23 levels	TRUE	reported
12	4493715	CA	C	0.0804	0.0149	0.2892	6.82e-08	rs66486362	10893	GCST90274789	Fibroblast growth factor 23 levels	TRUE	reported
12	4494954	T	C	0.0624	0.0123	0.2923	3.91e-07	rs1013962	14732	GCST90274789	Fibroblast growth factor 23 levels	TRUE	reported
12	4495087	T	C	0.0871	0.0174	0.8799	5.56e-07	rs16931344	14726	GCST90274789	Fibroblast growth factor 23 levels	TRUE	reported
12	4495732	A	G	0.0863	0.0175	0.8804	8.16e-07	rs11063127	14726	GCST90274789	Fibroblast growth factor 23 levels	TRUE	reported
12	4495864	T	C	-0.0533	0.0114	0.5657	2.93e-06	rs12815443	14728	GCST90274789	Fibroblast growth factor 23 levels	TRUE	reported
12	4498015	A	G	-0.0822	0.0176	0.1172	3.01e-06	rs11063129	14731	GCST90274789	Fibroblast growth factor 23 levels	TRUE	reported
12	4498114	C	G	0.089	0.0178	0.8851	5.73e-07	rs11063130	14728	GCST90274789	Fibroblast growth factor 23 levels	TRUE	reported
12	4500608	T	C	0.0926	0.0177	0.8823	1.68e-07	rs17773299	14725	GCST90274789	Fibroblast growth factor 23 levels	TRUE	reported
12	4502791	T	C	0.069	0.0139	0.2704	6.9e-07	rs4766238	11978	GCST90274789	Fibroblast growth factor 23 levels	TRUE	reported
12	4505588	T	C	-0.0865	0.018	0.1158	1.54e-06	rs2358955	14722	GCST90274789	Fibroblast growth factor 23 levels	TRUE	reported
12	4506008	A	G	0.0876	0.018	0.8835	1.13e-06	rs2098509	14722	GCST90274789	Fibroblast growth factor 23 levels	TRUE	reported
12	4506123	A	G	0.0888	0.0182	0.8865	1.07e-06	rs11063132	14719	GCST90274789	Fibroblast growth factor 23 levels	TRUE	reported
14	22607677	A	G	-0.1085	0.0235	0.8871	3.89e-06	rs75338333	10893	GCST90274789	Fibroblast growth factor 23 levels	TRUE	reported
14	102593982	T	TTA	0.2262	0.0467	0.9785	1.27e-06	rs200350335	10852	GCST90274789	Fibroblast growth factor 23 levels	TRUE	reported
15	63692378	A	G	0.4105	0.0893	0.0093	4.29e-06	rs544573702	10205	GCST90274789	Fibroblast growth factor 23 levels	TRUE	reported
15	75638154	T	C	-0.5369	0.1149	0.0113	2.97e-06	rs113002501	10597	GCST90274789	Fibroblast growth factor 23 levels	TRUE	reported
16	83119591	A	G	-0.0547	0.0119	0.5958	4.29e-06	rs7187580	14287	GCST90274789	Fibroblast growth factor 23 levels	TRUE	reported
16	83119914	T	C	-0.0551	0.0118	0.5715	3.02e-06	rs11641315	14286	GCST90274789	Fibroblast growth factor 23 levels	TRUE	reported
16	83120040	A	G	-0.0541	0.0118	0.5033	4.55e-06	rs9935137	14287	GCST90274789	Fibroblast growth factor 23 levels	TRUE	reported
16	83120073	T	C	0.0553	0.0119	0.4647	3.37e-06	rs9937458	14287	GCST90274789	Fibroblast growth factor 23 levels	TRUE	reported
16	83137317	T	C	-0.056	0.0119	0.4938	2.53e-06	rs11150539	14287	GCST90274789	Fibroblast growth factor 23 levels	TRUE	reported
18	6618365	T	C	0.2909	0.0593	0.0105	9.32e-07	rs77643477	14247	GCST90274789	Fibroblast growth factor 23 levels	TRUE	reported
18	6619550	C	G	-0.275	0.0601	0.9898	4.75e-06	rs142737439	14247	GCST90274789	Fibroblast growth factor 23 levels	TRUE	reported
18	6621308	T	C	-0.2794	0.0593	0.9895	2.46e-06	rs73938211	14248	GCST90274789	Fibroblast growth factor 23 levels	TRUE	reported
18	6621389	A	T	-0.2782	0.0599	0.9896	3.41e-06	rs141342984	14248	GCST90274789	Fibroblast growth factor 23 levels	TRUE	reported
18	6622839	T	C	0.2827	0.0593	0.0105	1.87e-06	rs144073133	14248	GCST90274789	Fibroblast growth factor 23 levels	TRUE	reported
18	6623086	A	C	-0.2789	0.0606	0.9898	4.18e-06	rs150798788	14247	GCST90274789	Fibroblast growth factor 23 levels	TRUE	reported
18	6624501	C	G	-0.2848	0.0599	0.9895	1.99e-06	rs141122005	14248	GCST90274789	Fibroblast growth factor 23 levels	TRUE	reported
18	6628066	T	C	-0.3151	0.065	0.9899	1.25e-06	rs146070713	13800	GCST90274789	Fibroblast growth factor 23 levels	TRUE	reported
20	52715154	T	C	-0.0655	0.0127	0.2718	2.5e-07	rs209961	14735	GCST90274789	Fibroblast growth factor 23 levels	TRUE	reported
20	52715186	A	T	0.0668	0.0127	0.7253	1.44e-07	rs458385	14727	GCST90274789	Fibroblast growth factor 23 levels	TRUE	reported
20	52715187	A	T	0.0664	0.0135	0.724	8.72e-07	rs458386	12843	GCST90274789	Fibroblast growth factor 23 levels	TRUE	reported
20	52716084	T	C	-0.0671	0.0127	0.2714	1.27e-07	rs209960	14720	GCST90274789	Fibroblast growth factor 23 levels	TRUE	reported
20	52717172	T	G	-0.0732	0.0134	0.2662	4.69e-08	rs209958	14287	GCST90274789	Fibroblast growth factor 23 levels	TRUE	reported
20	52720530	A	G	-0.0636	0.013	0.2879	9.97e-07	rs158530	14287	GCST90274789	Fibroblast growth factor 23 levels	TRUE	reported
20	52721095	A	G	0.0662	0.0128	0.7335	2.32e-07	rs209957	14733	GCST90274789	Fibroblast growth factor 23 levels	TRUE	reported
20	52721424	T	C	0.0596	0.0124	0.6558	1.54e-06	rs158529	14287	GCST90274789	Fibroblast growth factor 23 levels	TRUE	reported
20	52721956	A	G	-0.0589	0.0124	0.344	2.03e-06	rs158528	14287	GCST90274789	Fibroblast growth factor 23 levels	TRUE	reported
20	52722150	C	G	-0.059	0.0124	0.3441	1.95e-06	rs158527	14287	GCST90274789	Fibroblast growth factor 23 levels	TRUE	reported
20	52722628	A	T	0.0585	0.0125	0.6559	2.87e-06	rs158526	14286	GCST90274789	Fibroblast growth factor 23 levels	TRUE	reported
20	52722810	T	C	0.0584	0.0125	0.6559	2.98e-06	rs158525	14287	GCST90274789	Fibroblast growth factor 23 levels	TRUE	reported
20	52722856	A	G	0.0667	0.0129	0.7356	2.33e-07	rs209956	14722	GCST90274789	Fibroblast growth factor 23 levels	TRUE	reported
20	52722871	T	C	-0.0686	0.0134	0.2659	3.07e-07	rs209955	14286	GCST90274789	Fibroblast growth factor 23 levels	TRUE	reported
20	52722943	A	T	0.0701	0.0134	0.7341	1.68e-07	rs209954	14287	GCST90274789	Fibroblast growth factor 23 levels	TRUE	reported
20	52724309	T	C	0.0578	0.0125	0.6557	3.76e-06	rs158523	14287	GCST90274789	Fibroblast growth factor 23 levels	TRUE	reported
20	52724665	T	C	-0.0573	0.0125	0.3439	4.56e-06	rs158521	14287	GCST90274789	Fibroblast growth factor 23 levels	TRUE	reported
20	52724718	T	C	-0.0578	0.0125	0.3439	3.76e-06	rs158520	14287	GCST90274789	Fibroblast growth factor 23 levels	TRUE	reported
20	52727953	A	C	-0.0717	0.0137	0.2628	1.66e-07	rs2870308	14287	GCST90274789	Fibroblast growth factor 23 levels	TRUE	reported
20	52731402	A	T	0.0907	0.0134	0.706	1.3e-11	rs6127099	14287	GCST90274789	Fibroblast growth factor 23 levels	TRUE	reported
20	52732362	T	C	0.0998	0.015	0.7997	2.87e-11	rs17216707	14287	GCST90274789	Fibroblast growth factor 23 levels	TRUE	reported
20	52735238	G	GT	0.0951	0.0174	0.8091	4.62e-08	rs35870583	10893	GCST90274789	Fibroblast growth factor 23 levels	TRUE	reported
20	52742047	T	C	-0.0804	0.0139	0.2045	7.29e-09	rs35194449	14715	GCST90274789	Fibroblast growth factor 23 levels	TRUE	reported
20	52742306	C	G	0.0907	0.0145	0.7952	3.97e-10	rs8121940	14287	GCST90274789	Fibroblast growth factor 23 levels	TRUE	reported
20	52742479	A	T	-0.0907	0.0145	0.2047	3.97e-10	rs6013897	14287	GCST90274789	Fibroblast growth factor 23 levels	TRUE	reported
20	52742590	A	G	0.0803	0.0139	0.7965	7.61e-09	rs17217119	14714	GCST90274789	Fibroblast growth factor 23 levels	TRUE	reported
22	18002038	A	G	0.1228	0.0257	0.0941	1.77e-06	rs368215473	9397	GCST90274789	Fibroblast growth factor 23 levels	TRUE	reported
22	22238107	T	C	0.0803	0.0166	0.1851	1.32e-06	rs35590112	12386	GCST90274789	Fibroblast growth factor 23 levels	TRUE	reported
22	28434538	T	G	0.4696	0.1025	0.0085	4.62e-06	rs111667313	9397	GCST90274789	Fibroblast growth factor 23 levels	TRUE	reported
1	92925962	T	G	-0.0954	0.0202	0.8166	2.33e-06	rs79050605	8287	GCST90274838	Transforming growth factor-alpha levels	TRUE	reported
1	166175871	C	G	-0.2692	0.056	0.9835	1.53e-06	rs78912149	13798	GCST90274838	Transforming growth factor-alpha levels	TRUE	reported
2	70737888	T	G	0.0679	0.0146	0.7919	3.31e-06	rs375668	14285	GCST90274838	Transforming growth factor-alpha levels	TRUE	reported
2	70743312	C	G	0.0793	0.0152	0.8158	1.82e-07	rs414399	14285	GCST90274838	Transforming growth factor-alpha levels	TRUE	reported
2	70746726	T	C	0.075	0.0148	0.8116	4.03e-07	rs455125	14718	GCST90274838	Transforming growth factor-alpha levels	TRUE	reported
2	70748650	A	G	0.0733	0.0148	0.8108	7.32e-07	rs2442152	14717	GCST90274838	Transforming growth factor-alpha levels	TRUE	reported
2	70749729	C	G	0.0758	0.0151	0.8128	5.17e-07	rs449409	14285	GCST90274838	Transforming growth factor-alpha levels	TRUE	reported
2	70750531	T	C	0.078	0.0149	0.8135	1.65e-07	rs426081	14733	GCST90274838	Transforming growth factor-alpha levels	TRUE	reported
2	70752343	A	G	0.0672	0.0144	0.7923	3.06e-06	rs453870	14727	GCST90274838	Transforming growth factor-alpha levels	TRUE	reported
2	70753753	A	G	-0.0678	0.0144	0.211	2.5e-06	rs452380	14728	GCST90274838	Transforming growth factor-alpha levels	TRUE	reported
2	70753882	T	C	0.0675	0.0144	0.7888	2.77e-06	rs374640	14731	GCST90274838	Transforming growth factor-alpha levels	TRUE	reported
2	70759427	T	C	0.115	0.0172	0.1416	2.29e-11	rs365259	14285	GCST90274838	Transforming growth factor-alpha levels	TRUE	reported
2	70760063	A	G	0.1174	0.0171	0.1385	6.63e-12	rs411053	14728	GCST90274838	Transforming growth factor-alpha levels	TRUE	reported
2	70761604	T	G	0.1154	0.0175	0.1409	4.27e-11	rs658914	13798	GCST90274838	Transforming growth factor-alpha levels	TRUE	reported
2	70762350	A	G	-0.1217	0.0184	0.8637	3.74e-11	rs370050	12741	GCST90274838	Transforming growth factor-alpha levels	TRUE	reported
2	70762351	A	AG	-0.0737	0.0146	0.3118	4.47e-07	rs397869425	11322	GCST90274838	Transforming growth factor-alpha levels	TRUE	reported
2	70762905	A	G	0.1187	0.0169	0.1431	2.16e-12	rs378322	14731	GCST90274838	Transforming growth factor-alpha levels	TRUE	reported
2	70764251	T	TG	0.1285	0.0193	0.1392	2.78e-11	rs146722227	11340	GCST90274838	Transforming growth factor-alpha levels	TRUE	reported
2	70764985	T	C	0.1179	0.0169	0.1403	3.03e-12	rs411821	14733	GCST90274838	Transforming growth factor-alpha levels	TRUE	reported
2	70766082	C	G	-0.1144	0.0169	0.86	1.29e-11	rs365632	14733	GCST90274838	Transforming growth factor-alpha levels	TRUE	reported
2	70772455	T	C	0.1357	0.0184	0.1147	1.64e-13	rs10489984	14729	GCST90274838	Transforming growth factor-alpha levels	TRUE	reported
2	70773571	T	C	0.1354	0.0183	0.115	1.37e-13	rs72912111	14728	GCST90274838	Transforming growth factor-alpha levels	TRUE	reported
2	70773785	CT	C	-0.1475	0.0205	0.8808	6.24e-13	rs113889951	11329	GCST90274838	Transforming growth factor-alpha levels	TRUE	reported
2	70773904	C	G	-0.1366	0.0184	0.8857	1.14e-13	rs57452574	14728	GCST90274838	Transforming growth factor-alpha levels	TRUE	reported
2	70774248	T	C	0.1359	0.0184	0.114	1.51e-13	rs72912113	14728	GCST90274838	Transforming growth factor-alpha levels	TRUE	reported
2	70774295	A	T	0.137	0.0184	0.114	9.65e-14	rs72912115	14728	GCST90274838	Transforming growth factor-alpha levels	TRUE	reported
2	70774454	T	C	0.1366	0.0184	0.1141	1.14e-13	rs113971512	14728	GCST90274838	Transforming growth factor-alpha levels	TRUE	reported
2	70774630	A	G	0.1367	0.0184	0.114	1.09e-13	rs112741266	14728	GCST90274838	Transforming growth factor-alpha levels	TRUE	reported
2	70774885	T	C	-0.1474	0.0203	0.8879	3.84e-13	rs111714549	12182	GCST90274838	Transforming growth factor-alpha levels	TRUE	reported
2	70775084	A	C	0.1403	0.0199	0.1116	1.79e-12	rs6708912	12848	GCST90274838	Transforming growth factor-alpha levels	TRUE	reported
2	70775194	A	AT	-0.1491	0.0207	0.8854	5.89e-13	rs11395690	11338	GCST90274838	Transforming growth factor-alpha levels	TRUE	reported
2	70775912	T	C	0.1349	0.0184	0.114	2.28e-13	rs17695836	14729	GCST90274838	Transforming growth factor-alpha levels	TRUE	reported
2	70776002	G	GT	-0.1479	0.0207	0.8848	9e-13	rs149318890	11337	GCST90274838	Transforming growth factor-alpha levels	TRUE	reported
2	70776281	T	C	-0.1346	0.0184	0.8864	2.57e-13	rs17639251	14729	GCST90274838	Transforming growth factor-alpha levels	TRUE	reported
2	70777559	T	TAA	0.144	0.021	0.1118	7.03e-12	rs201941839	11338	GCST90274838	Transforming growth factor-alpha levels	TRUE	reported
2	70777562	A	T	-0.1449	0.0203	0.8878	9.47e-13	rs572886111	12204	GCST90274838	Transforming growth factor-alpha levels	TRUE	reported
2	70777795	A	G	-0.1355	0.0184	0.8868	1.78e-13	rs138179911	14729	GCST90274838	Transforming growth factor-alpha levels	TRUE	reported
2	70777830	T	C	0.062	0.0134	0.2595	3.71e-06	rs111252906	14285	GCST90274838	Transforming growth factor-alpha levels	TRUE	reported
2	70778590	T	G	-0.1351	0.0185	0.8865	2.82e-13	rs79704315	14722	GCST90274838	Transforming growth factor-alpha levels	TRUE	reported
2	70778610	A	G	-0.1377	0.0185	0.8871	9.82e-14	rs112512914	14722	GCST90274838	Transforming growth factor-alpha levels	TRUE	reported
2	70780081	C	G	-0.0648	0.014	0.7617	3.68e-06	rs11466191	14285	GCST90274838	Transforming growth factor-alpha levels	TRUE	reported
2	70781146	A	AC	-0.1483	0.0209	0.8844	1.29e-12	rs11466189	11330	GCST90274838	Transforming growth factor-alpha levels	TRUE	reported
2	70781174	T	C	0.1401	0.02	0.1116	2.47e-12	rs10198077	12840	GCST90274838	Transforming growth factor-alpha levels	TRUE	reported
2	70782080	T	C	0.1417	0.0201	0.0945	1.79e-12	rs11466186	14729	GCST90274838	Transforming growth factor-alpha levels	TRUE	reported
2	70783657	T	C	-0.1324	0.0197	0.9001	1.81e-11	rs73936923	14727	GCST90274838	Transforming growth factor-alpha levels	TRUE	reported
2	70784661	C	G	-0.0783	0.0147	0.8023	1e-07	rs13392762	14725	GCST90274838	Transforming growth factor-alpha levels	TRUE	reported
2	70785806	A	C	0.0771	0.0144	0.2101	8.6e-08	rs12614998	14731	GCST90274838	Transforming growth factor-alpha levels	TRUE	reported
2	70786092	A	G	-0.0594	0.012	0.3737	7.42e-07	rs13020363	14732	GCST90274838	Transforming growth factor-alpha levels	TRUE	reported
2	70786598	T	C	0.0597	0.012	0.6256	6.52e-07	rs12997742	14732	GCST90274838	Transforming growth factor-alpha levels	TRUE	reported
2	70786881	T	C	-0.0668	0.0133	0.3701	5.1e-07	rs79025867	12197	GCST90274838	Transforming growth factor-alpha levels	TRUE	reported
2	70786885	T	C	-0.0624	0.013	0.3657	1.59e-06	rs13021710	12833	GCST90274838	Transforming growth factor-alpha levels	TRUE	reported
2	70787765	C	G	0.0601	0.012	0.6255	5.49e-07	rs13028458	14732	GCST90274838	Transforming growth factor-alpha levels	TRUE	reported
2	70788898	T	C	-0.0595	0.012	0.3741	7.11e-07	rs1523303	14732	GCST90274838	Transforming growth factor-alpha levels	TRUE	reported
2	70789532	A	C	-0.0751	0.0143	0.789	1.51e-07	rs17040266	14732	GCST90274838	Transforming growth factor-alpha levels	TRUE	reported
2	70790008	CAA	C	0.0708	0.0136	0.6333	1.93e-07	rs397984959	11341	GCST90274838	Transforming growth factor-alpha levels	TRUE	reported
2	70791004	T	C	-0.1323	0.0196	0.9005	1.48e-11	rs74544143	14732	GCST90274838	Transforming growth factor-alpha levels	TRUE	reported
2	70792009	A	G	-0.0599	0.012	0.3737	5.99e-07	rs1016121	14727	GCST90274838	Transforming growth factor-alpha levels	TRUE	reported
2	70792251	A	C	-0.1327	0.0197	0.901	1.63e-11	rs111580697	14732	GCST90274838	Transforming growth factor-alpha levels	TRUE	reported
2	70792815	T	C	0.1329	0.0197	0.0984	1.52e-11	rs78325918	14732	GCST90274838	Transforming growth factor-alpha levels	TRUE	reported
2	70794983	C	G	0.0605	0.012	0.6258	4.61e-07	rs12991163	14733	GCST90274838	Transforming growth factor-alpha levels	TRUE	reported
2	70795191	T	C	-0.059	0.0119	0.3738	7.12e-07	rs12996618	14733	GCST90274838	Transforming growth factor-alpha levels	TRUE	reported
2	70795519	A	C	-0.0722	0.0143	0.7874	4.44e-07	rs72912147	14731	GCST90274838	Transforming growth factor-alpha levels	TRUE	reported
2	70795939	A	AGT	0.0817	0.0141	0.484	6.86e-09	rs10594042	10894	GCST90274838	Transforming growth factor-alpha levels	TRUE	reported
2	70795939	A	T	0.0698	0.0136	0.6335	2.86e-07	rs12612909	11342	GCST90274838	Transforming growth factor-alpha levels	TRUE	reported
2	70796257	A	G	0.06	0.012	0.6253	5.73e-07	rs2215021	14733	GCST90274838	Transforming growth factor-alpha levels	TRUE	reported
2	70796339	A	G	0.1134	0.0183	0.115	5.77e-10	rs713111	14733	GCST90274838	Transforming growth factor-alpha levels	TRUE	reported
2	70796476	T	C	-0.0591	0.012	0.3744	8.44e-07	rs2190649	14732	GCST90274838	Transforming growth factor-alpha levels	TRUE	reported
2	70797390	C	G	-0.0593	0.012	0.3738	7.75e-07	rs13011532	14733	GCST90274838	Transforming growth factor-alpha levels	TRUE	reported
2	70798846	A	T	-0.119	0.0196	0.8854	1.27e-09	rs2840161	12803	GCST90274838	Transforming growth factor-alpha levels	TRUE	reported
2	70799620	T	C	-0.1323	0.0196	0.901	1.48e-11	rs2902450	14732	GCST90274838	Transforming growth factor-alpha levels	TRUE	reported
2	70800162	T	G	-0.0591	0.012	0.374	8.44e-07	rs11126276	14733	GCST90274838	Transforming growth factor-alpha levels	TRUE	reported
2	70801191	A	G	0.059	0.012	0.6254	8.8e-07	rs62151615	14731	GCST90274838	Transforming growth factor-alpha levels	TRUE	reported
2	70801473	G	GT	-0.148	0.0219	0.899	1.4e-11	rs141398901	11341	GCST90274838	Transforming growth factor-alpha levels	TRUE	reported
2	70801608	A	T	-0.0601	0.012	0.3741	5.49e-07	rs13016438	14729	GCST90274838	Transforming growth factor-alpha levels	TRUE	reported
2	70803304	C	G	0.1314	0.0195	0.0998	1.6e-11	rs113424166	14730	GCST90274838	Transforming growth factor-alpha levels	TRUE	reported
2	70803380	T	C	0.0718	0.0145	0.2003	7.36e-07	rs73936934	14723	GCST90274838	Transforming growth factor-alpha levels	TRUE	reported
2	70803469	T	C	0.0722	0.0145	0.2006	6.38e-07	rs73936935	14723	GCST90274838	Transforming growth factor-alpha levels	TRUE	reported
2	70803680	T	C	-0.1304	0.0195	0.9007	2.28e-11	rs76497699	14730	GCST90274838	Transforming growth factor-alpha levels	TRUE	reported
2	70804741	A	T	-0.1328	0.0195	0.9001	9.74e-12	rs77236129	14730	GCST90274838	Transforming growth factor-alpha levels	TRUE	reported
2	70806369	T	C	-0.0567	0.012	0.3892	2.3e-06	rs382925	14719	GCST90274838	Transforming growth factor-alpha levels	TRUE	reported
2	70806731	T	C	-0.0717	0.0145	0.7989	7.62e-07	rs6708790	14723	GCST90274838	Transforming growth factor-alpha levels	TRUE	reported
2	70806889	T	C	0.0723	0.0145	0.2002	6.16e-07	rs6751150	14723	GCST90274838	Transforming growth factor-alpha levels	TRUE	reported
2	70807125	T	C	-0.0721	0.0145	0.7993	6.61e-07	rs73936937	14723	GCST90274838	Transforming growth factor-alpha levels	TRUE	reported
2	70807259	A	AT	-0.0748	0.0163	0.7954	4.45e-06	rs143145267	11331	GCST90274838	Transforming growth factor-alpha levels	TRUE	reported
2	70807403	A	G	0.0724	0.0145	0.2006	5.94e-07	rs11675586	14722	GCST90274838	Transforming growth factor-alpha levels	TRUE	reported
2	70807660	T	G	0.189	0.0351	0.0343	7.26e-08	rs112468702	14732	GCST90274838	Transforming growth factor-alpha levels	TRUE	reported
2	70807919	A	T	0.0717	0.0144	0.2008	6.39e-07	rs12615990	14723	GCST90274838	Transforming growth factor-alpha levels	TRUE	reported
2	70808147	T	C	0.0716	0.0144	0.201	6.62e-07	rs10489986	14723	GCST90274838	Transforming growth factor-alpha levels	TRUE	reported
2	70808334	A	G	-0.0731	0.0146	0.8006	5.53e-07	rs12619641	14723	GCST90274838	Transforming growth factor-alpha levels	TRUE	reported
2	70808509	A	G	-0.072	0.0146	0.8003	8.16e-07	rs73936938	14723	GCST90274838	Transforming growth factor-alpha levels	TRUE	reported
2	70809219	A	G	0.0696	0.0146	0.2003	1.87e-06	rs10489987	14724	GCST90274838	Transforming growth factor-alpha levels	TRUE	reported
2	70809294	A	G	0.0692	0.0146	0.2007	2.14e-06	rs17696382	14724	GCST90274838	Transforming growth factor-alpha levels	TRUE	reported
2	70809306	T	C	-0.0704	0.0147	0.8034	1.68e-06	rs76665943	14723	GCST90274838	Transforming growth factor-alpha levels	TRUE	reported
2	70809360	T	C	-0.1357	0.0198	0.9011	7.2e-12	rs74543090	14729	GCST90274838	Transforming growth factor-alpha levels	TRUE	reported
2	70813211	T	C	0.0717	0.0147	0.2012	1.07e-06	rs112681226	14723	GCST90274838	Transforming growth factor-alpha levels	TRUE	reported
2	70813627	T	G	0.0731	0.0147	0.2027	6.6e-07	rs72912183	14721	GCST90274838	Transforming growth factor-alpha levels	TRUE	reported
2	70817505	T	C	0.1319	0.0197	0.1015	2.15e-11	rs881569	14729	GCST90274838	Transforming growth factor-alpha levels	TRUE	reported
2	70818459	CA	C	0.1582	0.0227	0.1014	3.19e-12	rs376271354	11331	GCST90274838	Transforming growth factor-alpha levels	TRUE	reported
2	154353575	T	C	0.3595	0.0718	0.9851	5.53e-07	rs181183561	12789	GCST90274838	Transforming growth factor-alpha levels	TRUE	reported
2	154590445	A	G	-0.3335	0.0703	0.0169	2.1e-06	rs185596618	12789	GCST90274838	Transforming growth factor-alpha levels	TRUE	reported
2	232793836	T	C	-0.672	0.1387	0.0047	1.27e-06	rs569579962	6777	GCST90274838	Transforming growth factor-alpha levels	TRUE	reported
4	16165036	A	G	-0.2684	0.05	0.0153	7.96e-08	rs34007466	14733	GCST90274838	Transforming growth factor-alpha levels	TRUE	reported
4	16270800	T	C	-0.2417	0.052	0.0141	3.35e-06	rs144844928	14731	GCST90274838	Transforming growth factor-alpha levels	TRUE	reported
5	123426231	A	G	0.9703	0.2076	0.9963	2.96e-06	rs74951577	8191	GCST90274838	Transforming growth factor-alpha levels	TRUE	reported
5	132025905	A	C	-0.0761	0.0166	0.7246	4.55e-06	rs11242125	9453	GCST90274838	Transforming growth factor-alpha levels	TRUE	reported
6	31021274	CG	C	0.0793	0.0165	0.216	1.54e-06	rs572644321	10894	GCST90274838	Transforming growth factor-alpha levels	TRUE	reported
6	31030839	CAA	C	-0.0721	0.0155	0.7629	3.29e-06	rs142376581	11337	GCST90274838	Transforming growth factor-alpha levels	TRUE	reported
6	31034427	C	G	0.0686	0.0149	0.2225	4.14e-06	rs9262658	12844	GCST90274838	Transforming growth factor-alpha levels	TRUE	reported
6	31034990	T	C	0.0717	0.0146	0.2343	9.06e-07	rs9262670	12842	GCST90274838	Transforming growth factor-alpha levels	TRUE	reported
6	31035118	A	G	0.0703	0.0149	0.2227	2.38e-06	rs185490114	12841	GCST90274838	Transforming growth factor-alpha levels	TRUE	reported
6	31035122	A	G	0.0684	0.0149	0.2216	4.42e-06	rs9262676	12841	GCST90274838	Transforming growth factor-alpha levels	TRUE	reported
6	31081251	A	G	0.0709	0.015	0.1829	2.28e-06	rs2233955	14733	GCST90274838	Transforming growth factor-alpha levels	TRUE	reported
6	31081838	T	C	0.0593	0.0127	0.2908	3.02e-06	rs3130975	14733	GCST90274838	Transforming growth factor-alpha levels	TRUE	reported
6	31081989	T	C	-0.0584	0.0125	0.6892	2.98e-06	rs3130977	14733	GCST90274838	Transforming growth factor-alpha levels	TRUE	reported
6	31082127	A	G	0.0593	0.0125	0.31	2.1e-06	rs3130552	14733	GCST90274838	Transforming growth factor-alpha levels	TRUE	reported
6	31082197	C	G	0.0578	0.0126	0.3019	4.49e-06	rs3130979	14732	GCST90274838	Transforming growth factor-alpha levels	TRUE	reported
6	117334777	A	C	-1.0683	0.2286	0.0041	2.97e-06	rs544657344	6777	GCST90274838	Transforming growth factor-alpha levels	TRUE	reported
8	2642413	T	TCAAA	-0.1214	0.0252	0.1131	1.45e-06	rs3991372	7943	GCST90274838	Transforming growth factor-alpha levels	TRUE	reported
8	2653455	T	G	-0.1091	0.0233	0.0938	2.84e-06	rs1026377	11334	GCST90274838	Transforming growth factor-alpha levels	TRUE	reported
8	2654153	C	G	0.1081	0.023	0.905	2.6e-06	rs1963491	11334	GCST90274838	Transforming growth factor-alpha levels	TRUE	reported
8	2654598	CAA	C	0.1284	0.0273	0.9046	2.56e-06	rs113925710	7943	GCST90274838	Transforming growth factor-alpha levels	TRUE	reported
8	2673987	C	G	-0.0782	0.0169	0.1997	3.71e-06	rs74643025	11333	GCST90274838	Transforming growth factor-alpha levels	TRUE	reported
8	13724808	C	G	0.1678	0.0361	0.9681	3.35e-06	rs34630685	14285	GCST90274838	Transforming growth factor-alpha levels	TRUE	reported
10	30032133	A	G	0.254	0.0517	0.0178	8.97e-07	rs76275710	14732	GCST90274838	Transforming growth factor-alpha levels	TRUE	reported
10	30033857	A	T	0.2456	0.0505	0.0182	1.15e-06	rs113686561	14733	GCST90274838	Transforming growth factor-alpha levels	TRUE	reported
10	30035149	T	C	-0.2446	0.0503	0.9818	1.16e-06	rs16930553	14733	GCST90274838	Transforming growth factor-alpha levels	TRUE	reported
10	30036821	A	G	-0.2478	0.0505	0.9815	9.25e-07	rs55976782	14733	GCST90274838	Transforming growth factor-alpha levels	TRUE	reported
10	30038067	A	G	0.2547	0.0508	0.0182	5.34e-07	rs74130119	14733	GCST90274838	Transforming growth factor-alpha levels	TRUE	reported
10	30041314	A	G	0.2526	0.0508	0.0184	6.61e-07	rs74130120	14733	GCST90274838	Transforming growth factor-alpha levels	TRUE	reported
10	30041659	A	G	-0.2508	0.0506	0.9815	7.18e-07	rs74130121	14733	GCST90274838	Transforming growth factor-alpha levels	TRUE	reported
10	30042437	T	C	-0.2601	0.0508	0.9817	3.05e-07	rs74130123	14733	GCST90274838	Transforming growth factor-alpha levels	TRUE	reported
10	55366501	A	G	0.3698	0.0798	0.0387	3.59e-06	rs146702776	7308	GCST90274838	Transforming growth factor-alpha levels	TRUE	reported
10	90815975	T	G	-0.0947	0.0199	0.1327	1.95e-06	rs1937339	11782	GCST90274838	Transforming growth factor-alpha levels	TRUE	reported
10	90832718	A	G	0.0943	0.0198	0.8681	1.91e-06	rs11202958	11780	GCST90274838	Transforming growth factor-alpha levels	TRUE	reported
10	90836825	A	G	-0.095	0.0198	0.1322	1.6e-06	rs4934441	11780	GCST90274838	Transforming growth factor-alpha levels	TRUE	reported
10	90837061	A	G	0.0949	0.0198	0.8683	1.64e-06	rs11202961	11780	GCST90274838	Transforming growth factor-alpha levels	TRUE	reported
10	90843939	T	C	-0.0906	0.0198	0.1321	4.74e-06	rs2211596	11780	GCST90274838	Transforming growth factor-alpha levels	TRUE	reported
10	90844007	A	G	-0.0913	0.0198	0.1319	4.01e-06	rs2211597	11780	GCST90274838	Transforming growth factor-alpha levels	TRUE	reported
11	10980334	T	C	-0.8029	0.1688	0.0032	1.97e-06	rs192203184	6939	GCST90274838	Transforming growth factor-alpha levels	TRUE	reported
11	13247816	A	G	-0.7884	0.1669	0.9951	2.31e-06	rs552989091	6862	GCST90274838	Transforming growth factor-alpha levels	TRUE	reported
11	13377277	T	C	0.3864	0.077	0.0124	5.22e-07	rs148055096	9194	GCST90274838	Transforming growth factor-alpha levels	TRUE	reported
11	119501013	A	G	-0.0904	0.0186	0.885	1.17e-06	rs76080778	14726	GCST90274838	Transforming growth factor-alpha levels	TRUE	reported
11	119501720	A	G	-0.086	0.0184	0.8804	2.96e-06	rs7103203	14727	GCST90274838	Transforming growth factor-alpha levels	TRUE	reported
11	119502703	T	C	0.088	0.0185	0.1152	1.97e-06	rs12291064	14733	GCST90274838	Transforming growth factor-alpha levels	TRUE	reported
11	119504482	A	G	0.0894	0.0186	0.1153	1.54e-06	rs2014552	14732	GCST90274838	Transforming growth factor-alpha levels	TRUE	reported
11	119505336	T	G	0.0904	0.0186	0.1157	1.17e-06	rs60657140	14729	GCST90274838	Transforming growth factor-alpha levels	TRUE	reported
11	119505431	T	C	0.0907	0.0188	0.1129	1.4e-06	rs78757430	14728	GCST90274838	Transforming growth factor-alpha levels	TRUE	reported
11	119506018	T	C	0.0959	0.019	0.1107	4.48e-07	rs12270510	14731	GCST90274838	Transforming growth factor-alpha levels	TRUE	reported
11	119506749	A	G	0.0907	0.0184	0.1195	8.25e-07	rs4936490	14731	GCST90274838	Transforming growth factor-alpha levels	TRUE	reported
11	119507477	A	G	0.0935	0.0187	0.1162	5.73e-07	rs7105962	14725	GCST90274838	Transforming growth factor-alpha levels	TRUE	reported
12	83427659	A	G	-0.5008	0.1082	0.9924	3.68e-06	rs113390964	8697	GCST90274838	Transforming growth factor-alpha levels	TRUE	reported
12	111865049	C	G	0.0633	0.0135	0.4755	2.75e-06	rs7310615	11334	GCST90274838	Transforming growth factor-alpha levels	TRUE	reported
12	111884608	T	C	0.0706	0.0131	0.476	7.07e-08	rs3184504	11782	GCST90274838	Transforming growth factor-alpha levels	TRUE	reported
12	111904371	A	T	-0.0685	0.0131	0.5101	1.7e-07	rs4766578	11782	GCST90274838	Transforming growth factor-alpha levels	TRUE	reported
12	111910219	A	G	0.0673	0.0131	0.4894	2.79e-07	rs10774625	11781	GCST90274838	Transforming growth factor-alpha levels	TRUE	reported
12	111932800	T	C	-0.0642	0.0134	0.5236	1.66e-06	rs7137828	11334	GCST90274838	Transforming growth factor-alpha levels	TRUE	reported
12	111973358	A	G	0.0645	0.0134	0.4775	1.48e-06	rs597808	11333	GCST90274838	Transforming growth factor-alpha levels	TRUE	reported
12	112007756	T	C	-0.0708	0.0131	0.5228	6.5e-08	rs653178	11782	GCST90274838	Transforming growth factor-alpha levels	TRUE	reported
13	104883670	T	C	-0.564	0.1214	0.9937	3.39e-06	rs75584198	8485	GCST90274838	Transforming growth factor-alpha levels	TRUE	reported
14	61112735	G	GT	-0.0924	0.0199	0.7914	3.43e-06	rs112733948	10894	GCST90274838	Transforming growth factor-alpha levels	TRUE	reported
16	64017022	A	T	0.3009	0.0629	0.9869	1.72e-06	rs146021710	14285	GCST90274838	Transforming growth factor-alpha levels	TRUE	reported
17	38127112	A	G	0.0543	0.0116	0.4628	2.85e-06	rs4239225	14724	GCST90274838	Transforming growth factor-alpha levels	TRUE	reported
17	38128648	T	C	0.0535	0.0115	0.4634	3.28e-06	rs3859192	14733	GCST90274838	Transforming growth factor-alpha levels	TRUE	reported
17	38128714	A	G	0.053	0.0115	0.4625	4.05e-06	rs3859191	14731	GCST90274838	Transforming growth factor-alpha levels	TRUE	reported
17	38129506	A	G	0.0533	0.0115	0.4632	3.57e-06	rs4065876	14731	GCST90274838	Transforming growth factor-alpha levels	TRUE	reported
17	38129996	A	T	-0.0537	0.0115	0.5369	3.02e-06	rs60137005	14731	GCST90274838	Transforming growth factor-alpha levels	TRUE	reported
17	38130139	T	C	0.0536	0.0115	0.4631	3.15e-06	rs56326707	14731	GCST90274838	Transforming growth factor-alpha levels	TRUE	reported
17	38131187	A	C	0.0533	0.0115	0.4631	3.57e-06	rs56030650	14731	GCST90274838	Transforming growth factor-alpha levels	TRUE	reported
17	38136026	T	G	-0.0631	0.0116	0.461	5.34e-08	rs9898547	14725	GCST90274838	Transforming growth factor-alpha levels	TRUE	reported
17	38137033	A	G	0.0655	0.0116	0.5369	1.64e-08	rs3859189	14726	GCST90274838	Transforming growth factor-alpha levels	TRUE	reported
17	38137364	A	G	-0.0643	0.0116	0.4625	2.97e-08	rs3087852	14725	GCST90274838	Transforming growth factor-alpha levels	TRUE	reported
17	38137623	T	C	-0.0652	0.0116	0.4632	1.9e-08	rs8075668	14726	GCST90274838	Transforming growth factor-alpha levels	TRUE	reported
17	38138098	CA	C	0.0648	0.0132	0.5358	9.15e-07	rs11327630	11335	GCST90274838	Transforming growth factor-alpha levels	TRUE	reported
17	38138995	C	G	-0.0647	0.0116	0.4632	2.44e-08	rs11655264	14725	GCST90274838	Transforming growth factor-alpha levels	TRUE	reported
17	38140927	A	C	0.0645	0.0117	0.4547	3.53e-08	rs2305482	14725	GCST90274838	Transforming growth factor-alpha levels	TRUE	reported
17	38142677	A	C	0.0606	0.0116	0.4577	1.75e-07	rs3816472	14732	GCST90274838	Transforming growth factor-alpha levels	TRUE	reported
17	38143532	T	C	-0.0597	0.0116	0.5417	2.65e-07	rs4433838	14731	GCST90274838	Transforming growth factor-alpha levels	TRUE	reported
17	38143548	T	C	-0.06	0.0116	0.5416	2.31e-07	rs4065321	14733	GCST90274838	Transforming growth factor-alpha levels	TRUE	reported
17	38143768	T	C	-0.0605	0.0116	0.5421	1.83e-07	rs12940405	14731	GCST90274838	Transforming growth factor-alpha levels	TRUE	reported
17	38144116	T	C	-0.0601	0.0116	0.5412	2.21e-07	rs12450800	14731	GCST90274838	Transforming growth factor-alpha levels	TRUE	reported
17	38144187	T	C	0.0605	0.0116	0.4584	1.83e-07	rs12453764	14732	GCST90274838	Transforming growth factor-alpha levels	TRUE	reported
17	38144229	A	G	-0.0619	0.0124	0.5366	5.98e-07	rs12450688	12851	GCST90274838	Transforming growth factor-alpha levels	TRUE	reported
17	38144241	A	C	0.0598	0.0116	0.4586	2.53e-07	rs12453249	14732	GCST90274838	Transforming growth factor-alpha levels	TRUE	reported
17	38144368	T	TA	-0.0648	0.0133	0.543	1.1e-06	rs34555125	11337	GCST90274838	Transforming growth factor-alpha levels	TRUE	reported
17	38145088	C	G	0.0604	0.0116	0.4581	1.92e-07	rs9915252	14729	GCST90274838	Transforming growth factor-alpha levels	TRUE	reported
17	38146929	T	C	0.0601	0.0116	0.458	2.21e-07	rs8066582	14729	GCST90274838	Transforming growth factor-alpha levels	TRUE	reported
17	38148272	T	C	-0.0613	0.0132	0.6254	3.42e-06	rs60666652	12180	GCST90274838	Transforming growth factor-alpha levels	TRUE	reported
17	38149236	T	C	0.0596	0.0116	0.4577	2.78e-07	rs11658328	14729	GCST90274838	Transforming growth factor-alpha levels	TRUE	reported
17	38149350	C	G	0.0588	0.0116	0.4578	4e-07	rs8073254	14727	GCST90274838	Transforming growth factor-alpha levels	TRUE	reported
17	38149724	T	C	0.0604	0.0125	0.4607	1.35e-06	rs3785549	12848	GCST90274838	Transforming growth factor-alpha levels	TRUE	reported
17	38149727	T	C	-0.06	0.0117	0.5413	2.93e-07	rs3785550	14728	GCST90274838	Transforming growth factor-alpha levels	TRUE	reported
17	38150613	A	C	-0.0597	0.0116	0.5422	2.65e-07	rs3859187	14727	GCST90274838	Transforming growth factor-alpha levels	TRUE	reported
17	38151014	T	C	-0.0596	0.0116	0.5419	2.78e-07	rs2241245	14728	GCST90274838	Transforming growth factor-alpha levels	TRUE	reported
17	38151960	A	G	0.0597	0.0116	0.4582	2.65e-07	rs8070444	14727	GCST90274838	Transforming growth factor-alpha levels	TRUE	reported
17	38152304	A	T	0.06	0.0116	0.458	2.31e-07	rs8071037	14728	GCST90274838	Transforming growth factor-alpha levels	TRUE	reported
17	38153554	C	G	-0.0595	0.0116	0.5416	2.91e-07	rs2241244	14728	GCST90274838	Transforming growth factor-alpha levels	TRUE	reported
17	38159335	T	C	0.0547	0.0118	0.4126	3.56e-06	rs12941811	14715	GCST90274838	Transforming growth factor-alpha levels	TRUE	reported
17	38162131	CT	C	0.0688	0.0141	0.5023	1.06e-06	rs34213753	10894	GCST90274838	Transforming growth factor-alpha levels	TRUE	reported
17	52896367	T	G	-0.0561	0.0122	0.4039	4.26e-06	rs35496173	14285	GCST90274838	Transforming growth factor-alpha levels	TRUE	reported
17	52902972	A	T	-0.0581	0.0122	0.4071	1.91e-06	rs111613293	14285	GCST90274838	Transforming growth factor-alpha levels	TRUE	reported
19	15885492	A	T	0.143	0.0307	0.9552	3.19e-06	rs78464136	14285	GCST90274838	Transforming growth factor-alpha levels	TRUE	reported
19	58857883	A	G	0.2856	0.0569	0.9866	5.19e-07	rs149146289	14285	GCST90274838	Transforming growth factor-alpha levels	TRUE	reported
19	58875573	C	G	-0.2121	0.0435	0.0346	1.08e-06	rs117591817	14285	GCST90274838	Transforming growth factor-alpha levels	TRUE	reported
1	32260562	T	C	0.2585	0.0548	0.9859	2.39e-06	rs11582772	14243	GCST90274766	C-C motif chemokine 20 levels	TRUE	reported
1	238606022	T	C	-0.0953	0.0208	0.0967	4.61e-06	rs111674022	14288	GCST90274766	C-C motif chemokine 20 levels	TRUE	reported
2	15218425	A	G	0.7274	0.1557	0.997	2.99e-06	rs181915067	7844	GCST90274766	C-C motif chemokine 20 levels	TRUE	reported
2	98837013	T	C	0.7489	0.1637	0.0041	4.77e-06	rs565102876	8911	GCST90274766	C-C motif chemokine 20 levels	TRUE	reported
2	140652710	CA	C	-0.1104	0.0237	0.8734	3.19e-06	rs72465011	10894	GCST90274766	C-C motif chemokine 20 levels	TRUE	reported
2	228639837	T	TTTTCTAAGTTCTTAACA	-0.09	0.0195	0.1462	3.92e-06	rs139356017	11336	GCST90274766	C-C motif chemokine 20 levels	TRUE	reported
2	228640174	T	G	0.0814	0.013	0.6328	3.81e-10	rs6759404	13234	GCST90274766	C-C motif chemokine 20 levels	TRUE	reported
2	228640190	T	G	-0.0729	0.0135	0.2654	6.66e-08	rs6744322	14735	GCST90274766	C-C motif chemokine 20 levels	TRUE	reported
2	228640252	T	C	0.0715	0.0136	0.7367	1.46e-07	rs62189962	14735	GCST90274766	C-C motif chemokine 20 levels	TRUE	reported
2	228640494	A	T	-0.073	0.0135	0.2642	6.39e-08	rs11893915	14734	GCST90274766	C-C motif chemokine 20 levels	TRUE	reported
2	228640542	T	C	-0.0701	0.0136	0.2617	2.54e-07	rs11888288	14728	GCST90274766	C-C motif chemokine 20 levels	TRUE	reported
2	228641136	A	G	-0.071	0.0144	0.2616	8.2e-07	rs112584177	12851	GCST90274766	C-C motif chemokine 20 levels	TRUE	reported
2	228641232	A	G	0.07	0.0145	0.7387	1.38e-06	rs112214698	12849	GCST90274766	C-C motif chemokine 20 levels	TRUE	reported
2	228641264	A	G	0.0714	0.0145	0.7386	8.47e-07	rs139251500	12843	GCST90274766	C-C motif chemokine 20 levels	TRUE	reported
2	228641294	A	G	-0.0725	0.0145	0.2611	5.73e-07	rs56360507	12845	GCST90274766	C-C motif chemokine 20 levels	TRUE	reported
2	228641303	A	C	0.0718	0.0145	0.7385	7.36e-07	rs56382122	12844	GCST90274766	C-C motif chemokine 20 levels	TRUE	reported
2	228641454	A	G	0.0732	0.0135	0.7361	5.89e-08	rs55966087	14735	GCST90274766	C-C motif chemokine 20 levels	TRUE	reported
2	228641507	A	G	0.0742	0.0133	0.7265	2.42e-08	rs56241528	14731	GCST90274766	C-C motif chemokine 20 levels	TRUE	reported
2	228641539	A	T	-0.0736	0.0143	0.2652	2.65e-07	rs55816010	13237	GCST90274766	C-C motif chemokine 20 levels	TRUE	reported
2	228641573	A	G	-0.0723	0.0135	0.2634	8.53e-08	rs56314157	14735	GCST90274766	C-C motif chemokine 20 levels	TRUE	reported
2	228641839	T	C	0.0745	0.0149	0.7374	5.73e-07	rs56151268	11973	GCST90274766	C-C motif chemokine 20 levels	TRUE	reported
2	228641843	T	C	0.0738	0.016	0.7344	3.98e-06	rs55782132	10477	GCST90274766	C-C motif chemokine 20 levels	TRUE	reported
2	228642082	A	T	0.0715	0.0135	0.7367	1.18e-07	rs72960520	14733	GCST90274766	C-C motif chemokine 20 levels	TRUE	reported
2	228642250	T	C	0.0718	0.0135	0.7364	1.05e-07	rs72960521	14735	GCST90274766	C-C motif chemokine 20 levels	TRUE	reported
2	228642480	T	TTCCTTCCTTCCTTCCC	-0.0859	0.0146	0.3005	4.02e-09	rs573289278	11326	GCST90274766	C-C motif chemokine 20 levels	TRUE	reported
2	228642732	CT	C	0.0728	0.0154	0.7372	2.28e-06	rs147361198	11340	GCST90274766	C-C motif chemokine 20 levels	TRUE	reported
2	228642739	T	C	0.0709	0.0147	0.736	1.41e-06	rs115959650	12207	GCST90274766	C-C motif chemokine 20 levels	TRUE	reported
2	228642746	A	C	-0.0717	0.0147	0.2639	1.07e-06	rs77428498	12203	GCST90274766	C-C motif chemokine 20 levels	TRUE	reported
2	228642841	A	G	-0.0721	0.0135	0.2649	9.26e-08	rs62189967	14733	GCST90274766	C-C motif chemokine 20 levels	TRUE	reported
2	228642907	T	C	0.0755	0.0163	0.724	3.62e-06	rs62189968	9843	GCST90274766	C-C motif chemokine 20 levels	TRUE	reported
2	228643226	A	G	-0.0733	0.0135	0.262	5.65e-08	rs58374376	14720	GCST90274766	C-C motif chemokine 20 levels	TRUE	reported
2	228643257	A	C	-0.0728	0.0135	0.2622	6.94e-08	rs57170463	14720	GCST90274766	C-C motif chemokine 20 levels	TRUE	reported
2	228643400	A	G	0.0723	0.0135	0.7367	8.53e-08	rs58520665	14720	GCST90274766	C-C motif chemokine 20 levels	TRUE	reported
2	228643490	A	G	0.0725	0.0135	0.7368	7.86e-08	rs59915062	14720	GCST90274766	C-C motif chemokine 20 levels	TRUE	reported
2	228643515	T	TG	-0.0705	0.0151	0.2693	3.03e-06	rs58031073	11325	GCST90274766	C-C motif chemokine 20 levels	TRUE	reported
[truncated: 84,363 more rows]

## Sheet: Supplementary Table 2
Supplementary Table 2. MR-PRESSO analysis of circulating inflammatory cytokines with IVDD.
Exposure	Exposure.id	Outcome	Outcome.id	egger_intercept	se	pval
C-X-C motif chemokine 10 levels	GCST90274780	M13_INTERVERTEB	IVDD	-0.000475197	0.000716988	0.507636
C-X-C motif chemokine 6 levels	GCST90274783	M13_INTERVERTEB	IVDD	0.000698343	0.000685339	0.308615
Delta and Notch-like epidermal growth factor-related receptor levels	GCST90274785	M13_INTERVERTEB	IVDD	0.000499427	0.000813315	0.539352
Protein S100-A12 levels	GCST90274786	M13_INTERVERTEB	IVDD	0.00306875	0.00256773	0.233818
Interleukin-10 levels	GCST90274795	M13_INTERVERTEB	IVDD	0.00028142	0.00127338	0.825128
Neurotrophin-3 levels	GCST90274829	M13_INTERVERTEB	IVDD	0.00465397	0.00274676	0.0936956
SIR2-like protein 2 levels	GCST90274834	M13_INTERVERTEB	IVDD	-0.0031403	0.00281358	0.268894
Urokinase-type plasminogen activator levels	GCST90274847	M13_INTERVERTEB	IVDD	-0.00103366	0.000812856	0.203811

## Sheet: Supplementary Table 3
Supplementary Table 3. The IVW analysis of circulating inflammatory cytokines with IVDD.
Exposure	Exposure.id	Outcome	Outcome.id	Method	nsnp	b	se	pval	or	or_lci95	or_uci95
C-X-C motif chemokine 10 levels	GCST90274780	IVDD	M13_INTERVERTEB	MR Egger	970	0.0356295	0.00836167	2.23339e-05	1.03627	1.01943	1.0534
C-X-C motif chemokine 10 levels	GCST90274780	IVDD	M13_INTERVERTEB	Weighted median	970	0.0225431	0.0062988	0.000344986	1.0228	1.01025	1.0355
C-X-C motif chemokine 10 levels	GCST90274780	IVDD	M13_INTERVERTEB	Inverse variance weighted	970	0.0308823	0.00431299	8.05022e-13	1.03136	1.02268	1.04012
C-X-C motif chemokine 10 levels	GCST90274780	IVDD	M13_INTERVERTEB	Simple mode	970	0.0832005	0.0210862	8.52991e-05	1.08676	1.04276	1.13262
C-X-C motif chemokine 10 levels	GCST90274780	IVDD	M13_INTERVERTEB	Weighted mode	970	0.0724902	0.0105852	1.32578e-11	1.07518	1.05311	1.09772
C-X-C motif chemokine 6 levels	GCST90274783	IVDD	M13_INTERVERTEB	MR Egger	618	0.00888465	0.00296407	0.00283216	1.00892	1.00308	1.0148
C-X-C motif chemokine 6 levels	GCST90274783	IVDD	M13_INTERVERTEB	Weighted median	618	0.0109761	0.00221977	7.62526e-07	1.01104	1.00665	1.01544
C-X-C motif chemokine 6 levels	GCST90274783	IVDD	M13_INTERVERTEB	Inverse variance weighted	618	0.0113762	0.00167535	1.1186e-11	1.01144	1.00813	1.01477
C-X-C motif chemokine 6 levels	GCST90274783	IVDD	M13_INTERVERTEB	Simple mode	618	0.0142929	0.00375032	0.000152206	1.0144	1.00697	1.02188
C-X-C motif chemokine 6 levels	GCST90274783	IVDD	M13_INTERVERTEB	Weighted mode	618	0.0107572	0.0023106	3.95759e-06	1.01082	1.00625	1.0154
Delta and Notch-like epidermal growth factor-related receptor levels	GCST90274785	IVDD	M13_INTERVERTEB	MR Egger	784	-0.0217268	0.00683455	0.00153623	0.978508	0.965487	0.991704
Delta and Notch-like epidermal growth factor-related receptor levels	GCST90274785	IVDD	M13_INTERVERTEB	Weighted median	784	-0.0274095	0.0038194	7.15736e-13	0.972963	0.965706	0.980274
Delta and Notch-like epidermal growth factor-related receptor levels	GCST90274785	IVDD	M13_INTERVERTEB	Inverse variance weighted	784	-0.0178447	0.00259672	6.3307e-12	0.982314	0.977327	0.987326
Delta and Notch-like epidermal growth factor-related receptor levels	GCST90274785	IVDD	M13_INTERVERTEB	Simple mode	784	-0.0332027	0.0093648	0.000415173	0.967342	0.949749	0.985262
Delta and Notch-like epidermal growth factor-related receptor levels	GCST90274785	IVDD	M13_INTERVERTEB	Weighted mode	784	-0.0332027	0.00654355	4.86599e-07	0.967342	0.955015	0.979829
Protein S100-A12 levels	GCST90274786	IVDD	M13_INTERVERTEB	MR Egger	161	0.0660973	0.0182923	0.000404983	1.06833	1.03071	1.10733
Protein S100-A12 levels	GCST90274786	IVDD	M13_INTERVERTEB	Weighted median	161	0.114924	0.0090895	1.21293e-36	1.12179	1.10198	1.14195
Protein S100-A12 levels	GCST90274786	IVDD	M13_INTERVERTEB	Inverse variance weighted	161	0.0863606	0.0068654	2.75097e-36	1.0902	1.07563	1.10497
Protein S100-A12 levels	GCST90274786	IVDD	M13_INTERVERTEB	Simple mode	161	0.115975	0.0240949	3.41239e-06	1.12297	1.07117	1.17727
Protein S100-A12 levels	GCST90274786	IVDD	M13_INTERVERTEB	Weighted mode	161	0.115975	0.0272867	3.61689e-05	1.12297	1.06449	1.18466
Interleukin-10 levels	GCST90274795	IVDD	M13_INTERVERTEB	MR Egger	1188	-0.248462	0.0141802	2.62625e-61	0.779999	0.758619	0.801982
Interleukin-10 levels	GCST90274795	IVDD	M13_INTERVERTEB	Weighted median	1188	-0.256138	0.00433173	0	0.774035	0.767491	0.780634
Interleukin-10 levels	GCST90274795	IVDD	M13_INTERVERTEB	Inverse variance weighted	1188	-0.245451	0.00392188	0	0.782352	0.776361	0.788389
Interleukin-10 levels	GCST90274795	IVDD	M13_INTERVERTEB	Simple mode	1188	-0.251153	0.0156629	1.58369e-52	0.777903	0.754385	0.802154
Interleukin-10 levels	GCST90274795	IVDD	M13_INTERVERTEB	Weighted mode	1188	-0.253998	0.0136605	6.32586e-68	0.775694	0.7552	0.796743
Neurotrophin-3 levels	GCST90274829	IVDD	M13_INTERVERTEB	MR Egger	91	0.0626148	0.0265385	0.020492	1.06462	1.01066	1.12146
Neurotrophin-3 levels	GCST90274829	IVDD	M13_INTERVERTEB	Weighted median	91	0.102098	0.0177514	8.84201e-09	1.10749	1.06962	1.1467
Neurotrophin-3 levels	GCST90274829	IVDD	M13_INTERVERTEB	Inverse variance weighted	91	0.102567	0.0121781	3.69539e-17	1.10801	1.08188	1.13478
Neurotrophin-3 levels	GCST90274829	IVDD	M13_INTERVERTEB	Simple mode	91	0.0992002	0.0363533	0.00764486	1.10429	1.02834	1.18584
Neurotrophin-3 levels	GCST90274829	IVDD	M13_INTERVERTEB	Weighted mode	91	0.101953	0.0341507	0.00364699	1.10733	1.03564	1.18399
SIR2-like protein 2 levels	GCST90274834	IVDD	M13_INTERVERTEB	MR Egger	61	-0.0171292	0.0197688	0.389739	0.983017	0.945656	1.02185
SIR2-like protein 2 levels	GCST90274834	IVDD	M13_INTERVERTEB	Weighted median	61	-0.0352257	0.0188945	0.0622744	0.965388	0.93029	1.00181
SIR2-like protein 2 levels	GCST90274834	IVDD	M13_INTERVERTEB	Inverse variance weighted	61	-0.0331954	0.0135499	0.0142906	0.967349	0.941997	0.993384
SIR2-like protein 2 levels	GCST90274834	IVDD	M13_INTERVERTEB	Simple mode	61	-0.04423	0.04023	0.275974	0.956734	0.884192	1.03523
SIR2-like protein 2 levels	GCST90274834	IVDD	M13_INTERVERTEB	Weighted mode	61	-0.0335394	0.0265032	0.21059	0.967017	0.918066	1.01858
Urokinase-type plasminogen activator levels	GCST90274847	IVDD	M13_INTERVERTEB	MR Egger	958	0.0259491	0.00848743	0.00229506	1.02629	1.00936	1.0435
Urokinase-type plasminogen activator levels	GCST90274847	IVDD	M13_INTERVERTEB	Weighted median	958	0.0288268	0.004852	2.82907e-09	1.02925	1.0195	1.03908
Urokinase-type plasminogen activator levels	GCST90274847	IVDD	M13_INTERVERTEB	Inverse variance weighted	958	0.0160184	0.00332509	1.45423e-06	1.01615	1.00955	1.02279
Urokinase-type plasminogen activator levels	GCST90274847	IVDD	M13_INTERVERTEB	Simple mode	958	0.0574437	0.0187948	0.00230257	1.05913	1.02082	1.09887
Urokinase-type plasminogen activator levels	GCST90274847	IVDD	M13_INTERVERTEB	Weighted mode	958	0.0335068	0.0121149	0.00578867	1.03407	1.00981	1.05892

## Sheet: Supplementary Table 4
Supplementary Table 4. The MR-Egger regression analyses of circulating inflammatory cytokines with IVDD.
Exposure	Exposure.id	Outcome	Outcome.id	method	Q	Q_df	Q_pval
C-X-C motif chemokine 10 levels	GCST90274780	IVDD	M13_INTERVERTEB	MR Egger	1667.25	968	6.9391e-40
C-X-C motif chemokine 10 levels	GCST90274780	IVDD	M13_INTERVERTEB	Inverse variance weighted	1668.01	969	7.77678e-40
C-X-C motif chemokine 6 levels	GCST90274783	IVDD	M13_INTERVERTEB	MR Egger	255.67	616	1
C-X-C motif chemokine 6 levels	GCST90274783	IVDD	M13_INTERVERTEB	Inverse variance weighted	256.708	617	1
Delta and Notch-like epidermal growth factor-related receptor levels	GCST90274785	IVDD	M13_INTERVERTEB	MR Egger	663.75	782	0.999151
Delta and Notch-like epidermal growth factor-related receptor levels	GCST90274785	IVDD	M13_INTERVERTEB	Inverse variance weighted	664.127	783	0.999195
Protein S100-A12 levels	GCST90274786	IVDD	M13_INTERVERTEB	MR Egger	96.4913	159	0.999977
Protein S100-A12 levels	GCST90274786	IVDD	M13_INTERVERTEB	Inverse variance weighted	97.9196	160	0.999971
Interleukin-10 levels	GCST90274795	IVDD	M13_INTERVERTEB	MR Egger	2345.5	1186	1.14225e-78
Interleukin-10 levels	GCST90274795	IVDD	M13_INTERVERTEB	Inverse variance weighted	2345.6	1187	1.57001e-78
Neurotrophin-3 levels	GCST90274829	IVDD	M13_INTERVERTEB	MR Egger	85.5406	89	0.58417
Neurotrophin-3 levels	GCST90274829	IVDD	M13_INTERVERTEB	Inverse variance weighted	88.4114	90	0.527633
SIR2-like protein 2 levels	GCST90274834	IVDD	M13_INTERVERTEB	MR Egger	40.1987	59	0.970996
SIR2-like protein 2 levels	GCST90274834	IVDD	M13_INTERVERTEB	Inverse variance weighted	41.4445	60	0.967572
Urokinase-type plasminogen activator levels	GCST90274847	IVDD	M13_INTERVERTEB	MR Egger	1172.65	956	1.75773e-06
Urokinase-type plasminogen activator levels	GCST90274847	IVDD	M13_INTERVERTEB	Inverse variance weighted	1174.63	957	1.61466e-06

## Sheet: Supplementary Table 5
Supplementary Table 5. MR-PRESSO analysis of circulating inflammatory cytokines with OP
Exposure	Exposure.id	Outcome	Outcome.id	egger_intercept	se	pval
Caspase 8 levels	GCST90274763	OP	M13_OSTEOPOROSIS	-0.00331138	0.00358907	0.357402
C-C motif chemokine 19 levels	GCST90274765	OP	M13_OSTEOPOROSIS	-0.00124808	0.00131914	0.344156
C-C motif chemokine 25 levels	GCST90274768	OP	M13_OSTEOPOROSIS	0.000458639	0.000891031	0.60681
CD40L receptor levels	GCST90274772	OP	M13_OSTEOPOROSIS	-0.000794431	0.00213102	0.709453
Protein S100-A12 levels	GCST90274786	OP	M13_OSTEOPOROSIS	-0.00185687	0.00551341	0.736719
Fms-related tyrosine kinase 3 ligand levels	GCST90274791	OP	M13_OSTEOPOROSIS	0.000648903	0.00198696	0.74405
Glial cell line-derived neurotrophic factor levels	GCST90274792	OP	M13_OSTEOPOROSIS	-0.000813802	0.00123807	0.511172
Interleukin-18 levels	GCST90274803	OP	M13_OSTEOPOROSIS	-0.00318215	0.00171002	0.0630136
Interleukin-7 levels	GCST90274816	OP	M13_OSTEOPOROSIS	0.00419443	0.0036593	0.252526
Monocyte chemoattractant protein 2 levels	GCST90274822	OP	M13_OSTEOPOROSIS	0.0013439	0.00122133	0.271515
Monocyte chemoattractant protein-3 levels	GCST90274823	OP	M13_OSTEOPOROSIS	0.000974984	0.00323966	0.763616
Osteoprotegerin levels	GCST90274830	OP	M13_OSTEOPOROSIS	0.00308695	0.00186084	0.0975361
Stem cell factor levels	GCST90274833	OP	M13_OSTEOPOROSIS	-0.00018235	0.00157241	0.907697
Tumor necrosis factor levels	GCST90274839	OP	M13_OSTEOPOROSIS	-0.00153923	0.0068046	0.821573

## Sheet: Supplementary Table 6
Supplementary Table 6. The IVW analysis of circulating inflammatory cytokines with OP.
Exposure	Exposure.id	Outcome	Outcome.id	Method	nsnp	b	se	pval	or	or_lci95	or_uci95
Caspase 8 levels	GCST90274763	OP	M13_OSTEOPOROSIS	MR Egger	187	0.149487	0.0324043	7.38786e-06	1.16124	1.08978	1.23738
Caspase 8 levels	GCST90274763	OP	M13_OSTEOPOROSIS	Weighted median	187	0.153295	0.0213484	6.93956e-13	1.16567	1.1179	1.21548
Caspase 8 levels	GCST90274763	OP	M13_OSTEOPOROSIS	Inverse variance weighted	187	0.123107	0.0152472	6.79958e-16	1.131	1.09771	1.16531
Caspase 8 levels	GCST90274763	OP	M13_OSTEOPOROSIS	Simple mode	187	0.170372	0.047409	0.000417453	1.18575	1.08053	1.30121
Caspase 8 levels	GCST90274763	OP	M13_OSTEOPOROSIS	Weighted mode	187	0.159332	0.0353517	1.16016e-05	1.17273	1.09422	1.25687
C-C motif chemokine 19 levels	GCST90274765	OP	M13_OSTEOPOROSIS	MR Egger	2938	-0.0512497	0.00923507	3.12066e-08	0.950041	0.933	0.967394
C-C motif chemokine 19 levels	GCST90274765	OP	M13_OSTEOPOROSIS	Weighted median	2938	-0.0497749	0.0042743	2.42879e-31	0.951444	0.943506	0.959448
C-C motif chemokine 19 levels	GCST90274765	OP	M13_OSTEOPOROSIS	Inverse variance weighted	2938	-0.0582544	0.00552038	4.9401e-26	0.94341	0.933257	0.953673
C-C motif chemokine 19 levels	GCST90274765	OP	M13_OSTEOPOROSIS	Simple mode	2938	-0.0496706	0.00906859	4.68567e-08	0.951543	0.934779	0.968607
C-C motif chemokine 19 levels	GCST90274765	OP	M13_OSTEOPOROSIS	Weighted mode	2938	-0.0496706	0.00580065	1.74715e-17	0.951543	0.940786	0.962423
C-C motif chemokine 25 levels	GCST90274768	OP	M13_OSTEOPOROSIS	MR Egger	1694	-0.0303802	0.00445186	1.22786e-11	0.970077	0.961649	0.978578
C-C motif chemokine 25 levels	GCST90274768	OP	M13_OSTEOPOROSIS	Weighted median	1694	-0.035496	0.00395184	2.65499e-19	0.965127	0.95768	0.972631
C-C motif chemokine 25 levels	GCST90274768	OP	M13_OSTEOPOROSIS	Inverse variance weighted	1694	-0.0284646	0.00244257	2.20128e-31	0.971937	0.967295	0.976601
C-C motif chemokine 25 levels	GCST90274768	OP	M13_OSTEOPOROSIS	Simple mode	1694	-0.0766673	0.0105545	5.71193e-13	0.926198	0.907235	0.945558
C-C motif chemokine 25 levels	GCST90274768	OP	M13_OSTEOPOROSIS	Weighted mode	1694	-0.058705	0.0066558	2.78285e-18	0.942985	0.930763	0.955367
CD40L receptor levels	GCST90274772	OP	M13_OSTEOPOROSIS	MR Egger	525	-0.0188067	0.0112807	0.0960822	0.981369	0.959909	1.00331
CD40L receptor levels	GCST90274772	OP	M13_OSTEOPOROSIS	Weighted median	525	-0.0120042	0.00737582	0.10363	0.988068	0.973886	1.00246
CD40L receptor levels	GCST90274772	OP	M13_OSTEOPOROSIS	Inverse variance weighted	525	-0.0224032	0.00584143	0.000125446	0.977846	0.966714	0.989106
CD40L receptor levels	GCST90274772	OP	M13_OSTEOPOROSIS	Simple mode	525	-0.0144386	0.013261	0.276743	0.985665	0.960376	1.01162
CD40L receptor levels	GCST90274772	OP	M13_OSTEOPOROSIS	Weighted mode	525	-0.00508274	0.00864177	0.556678	0.99493	0.97822	1.01193
Protein S100-A12 levels	GCST90274786	OP	M13_OSTEOPOROSIS	MR Egger	161	0.107009	0.0393117	0.00721167	1.11294	1.03041	1.20209
Protein S100-A12 levels	GCST90274786	OP	M13_OSTEOPOROSIS	Weighted median	161	0.0878803	0.0188257	3.03979e-06	1.09186	1.0523	1.1329
Protein S100-A12 levels	GCST90274786	OP	M13_OSTEOPOROSIS	Inverse variance weighted	161	0.094735	0.014741	1.30464e-10	1.09937	1.06806	1.13159
Protein S100-A12 levels	GCST90274786	OP	M13_OSTEOPOROSIS	Simple mode	161	0.0861152	0.0440108	0.0521254	1.08993	0.999854	1.18812
Protein S100-A12 levels	GCST90274786	OP	M13_OSTEOPOROSIS	Weighted mode	161	0.0861152	0.0390854	0.0290058	1.08993	1.00955	1.17671
Fms-related tyrosine kinase 3 ligand levels	GCST90274791	OP	M13_OSTEOPOROSIS	MR Egger	1060	0.0944484	0.024889	0.000156149	1.09905	1.04672	1.154
Fms-related tyrosine kinase 3 ligand levels	GCST90274791	OP	M13_OSTEOPOROSIS	Weighted median	1060	0.106619	0.0106779	1.77341e-23	1.11251	1.08947	1.13604
Fms-related tyrosine kinase 3 ligand levels	GCST90274791	OP	M13_OSTEOPOROSIS	Inverse variance weighted	1060	0.102247	0.00701892	4.53434e-48	1.10766	1.09252	1.123
Fms-related tyrosine kinase 3 ligand levels	GCST90274791	OP	M13_OSTEOPOROSIS	Simple mode	1060	0.104982	0.0433214	0.0155462	1.11069	1.02027	1.20912
Fms-related tyrosine kinase 3 ligand levels	GCST90274791	OP	M13_OSTEOPOROSIS	Weighted mode	1060	0.119497	0.0341119	0.000479081	1.12693	1.05405	1.20485
Glial cell line-derived neurotrophic factor levels	GCST90274792	OP	M13_OSTEOPOROSIS	MR Egger	776	-0.0458582	0.0101804	7.67606e-06	0.955177	0.936307	0.974428
Glial cell line-derived neurotrophic factor levels	GCST90274792	OP	M13_OSTEOPOROSIS	Weighted median	776	-0.0541804	0.00877236	6.56365e-10	0.947261	0.931113	0.963689
Glial cell line-derived neurotrophic factor levels	GCST90274792	OP	M13_OSTEOPOROSIS	Inverse variance weighted	776	-0.0512882	0.00594955	6.66481e-18	0.950005	0.938991	0.961148
Glial cell line-derived neurotrophic factor levels	GCST90274792	OP	M13_OSTEOPOROSIS	Simple mode	776	-0.0190811	0.0244475	0.435337	0.9811	0.935197	1.02926
Glial cell line-derived neurotrophic factor levels	GCST90274792	OP	M13_OSTEOPOROSIS	Weighted mode	776	-0.0584014	0.0165835	0.000453948	0.943271	0.913104	0.974435
Interleukin-18 levels	GCST90274803	OP	M13_OSTEOPOROSIS	MR Egger	1161	0.182307	0.0138507	5.62508e-37	1.19998	1.16784	1.23301
Interleukin-18 levels	GCST90274803	OP	M13_OSTEOPOROSIS	Weighted median	1161	0.173557	0.00601616	5.30515e-183	1.18953	1.17558	1.20364
Interleukin-18 levels	GCST90274803	OP	M13_OSTEOPOROSIS	Inverse variance weighted	1161	0.157749	0.00420434	0	1.17087	1.16126	1.18056
Interleukin-18 levels	GCST90274803	OP	M13_OSTEOPOROSIS	Simple mode	1161	0.17514	0.0202353	1.61926e-17	1.19141	1.14508	1.23962
Interleukin-18 levels	GCST90274803	OP	M13_OSTEOPOROSIS	Weighted mode	1161	0.17514	0.0171436	1.60801e-23	1.19141	1.15204	1.23213
Interleukin-7 levels	GCST90274816	OP	M13_OSTEOPOROSIS	MR Egger	332	0.0427387	0.0336698	0.205212	1.04367	0.977014	1.11486
Interleukin-7 levels	GCST90274816	OP	M13_OSTEOPOROSIS	Weighted median	332	0.0695165	0.0161575	1.68934e-05	1.07199	1.03857	1.10648
Interleukin-7 levels	GCST90274816	OP	M13_OSTEOPOROSIS	Inverse variance weighted	332	0.0788374	0.0119096	3.59994e-11	1.08203	1.05706	1.10758
Interleukin-7 levels	GCST90274816	OP	M13_OSTEOPOROSIS	Simple mode	332	0.0651911	0.0486592	0.181246	1.06736	0.97027	1.17417
Interleukin-7 levels	GCST90274816	OP	M13_OSTEOPOROSIS	Weighted mode	332	0.0651911	0.0419208	0.120877	1.06736	0.98317	1.15877
Monocyte chemoattractant protein 2 levels	GCST90274822	OP	M13_OSTEOPOROSIS	MR Egger	790	-0.0344952	0.00311189	1.22838e-26	0.966093	0.960218	0.972003
Monocyte chemoattractant protein 2 levels	GCST90274822	OP	M13_OSTEOPOROSIS	Weighted median	790	-0.033869	0.00314326	4.51265e-27	0.966698	0.960761	0.972672
Monocyte chemoattractant protein 2 levels	GCST90274822	OP	M13_OSTEOPOROSIS	Inverse variance weighted	790	-0.0320154	0.00214597	2.48351e-50	0.968492	0.964427	0.972574
Monocyte chemoattractant protein 2 levels	GCST90274822	OP	M13_OSTEOPOROSIS	Simple mode	790	-0.0265319	0.00718052	0.000235086	0.973817	0.960208	0.987619
Monocyte chemoattractant protein 2 levels	GCST90274822	OP	M13_OSTEOPOROSIS	Weighted mode	790	-0.0387679	0.00525563	4.12116e-13	0.961974	0.952116	0.971935
Monocyte chemoattractant protein-3 levels	GCST90274823	OP	M13_OSTEOPOROSIS	MR Egger	380	-0.0668547	0.0297519	0.0252116	0.935331	0.882348	0.991495
Monocyte chemoattractant protein-3 levels	GCST90274823	OP	M13_OSTEOPOROSIS	Weighted median	380	-0.0804624	0.0138932	6.9765e-09	0.92269	0.897903	0.94816
Monocyte chemoattractant protein-3 levels	GCST90274823	OP	M13_OSTEOPOROSIS	Inverse variance weighted	380	-0.0583813	0.0096156	1.26707e-09	0.94329	0.925679	0.961237
Monocyte chemoattractant protein-3 levels	GCST90274823	OP	M13_OSTEOPOROSIS	Simple mode	380	-0.123528	0.0442547	0.0055156	0.883797	0.810368	0.96388
Monocyte chemoattractant protein-3 levels	GCST90274823	OP	M13_OSTEOPOROSIS	Weighted mode	380	-0.12078	0.0396669	0.00249045	0.886228	0.819937	0.957879
Osteoprotegerin levels	GCST90274830	OP	M13_OSTEOPOROSIS	MR Egger	784	-0.0976091	0.0187299	2.40007e-07	0.907003	0.874311	0.940919
Osteoprotegerin levels	GCST90274830	OP	M13_OSTEOPOROSIS	Weighted median	784	-0.087256	0.00952672	5.23444e-20	0.916442	0.899489	0.933715
Osteoprotegerin levels	GCST90274830	OP	M13_OSTEOPOROSIS	Inverse variance weighted	784	-0.0687147	0.00689483	2.14429e-23	0.933593	0.921061	0.946295
Osteoprotegerin levels	GCST90274830	OP	M13_OSTEOPOROSIS	Simple mode	784	-0.0703506	0.0247843	0.00464965	0.932067	0.887872	0.978462
Osteoprotegerin levels	GCST90274830	OP	M13_OSTEOPOROSIS	Weighted mode	784	-0.0940278	0.0192425	1.24545e-06	0.910257	0.876566	0.945244
Stem cell factor levels	GCST90274833	OP	M13_OSTEOPOROSIS	MR Egger	1168	-0.0554038	0.0128247	1.6925e-05	0.946103	0.922618	0.970186
Stem cell factor levels	GCST90274833	OP	M13_OSTEOPOROSIS	Weighted median	1168	-0.0408359	0.00712018	9.73742e-09	0.959987	0.946683	0.973478
Stem cell factor levels	GCST90274833	OP	M13_OSTEOPOROSIS	Inverse variance weighted	1168	-0.056775	0.00496346	2.68183e-30	0.944807	0.93566	0.954043
Stem cell factor levels	GCST90274833	OP	M13_OSTEOPOROSIS	Simple mode	1168	-0.0389879	0.0313817	0.214348	0.961762	0.904389	1.02278
Stem cell factor levels	GCST90274833	OP	M13_OSTEOPOROSIS	Weighted mode	1168	-0.0389879	0.0419546	0.352933	0.961762	0.88584	1.04419
Tumor necrosis factor levels	GCST90274839	OP	M13_OSTEOPOROSIS	MR Egger	89	0.16348	0.0511282	0.00193379	1.1776	1.06531	1.30173
Tumor necrosis factor levels	GCST90274839	OP	M13_OSTEOPOROSIS	Weighted median	89	0.132596	0.0410048	0.00122205	1.14179	1.05361	1.23734
Tumor necrosis factor levels	GCST90274839	OP	M13_OSTEOPOROSIS	Inverse variance weighted	89	0.153737	0.0274024	2.01913e-08	1.16618	1.1052	1.23053
Tumor necrosis factor levels	GCST90274839	OP	M13_OSTEOPOROSIS	Simple mode	89	0.313193	0.0987552	0.00208863	1.36779	1.12708	1.65989
Tumor necrosis factor levels	GCST90274839	OP	M13_OSTEOPOROSIS	Weighted mode	89	0.0527938	0.0607909	0.387511	1.05421	0.935797	1.18761

## Sheet: Supplementary Table 7
Supplementary Table 7. The MR-Egger regression analyses of circulating inflammatory cytokines with OP
Exposure	Exposure.id	Outcome	Outcome.id	method	Q	Q_df	Q_pval
Caspase 8 levels	GCST90274763	OP	M13_OSTEOPOROSIS	MR Egger	75.9461	185	1
Caspase 8 levels	GCST90274763	OP	M13_OSTEOPOROSIS	Inverse variance weighted	76.7973	186	1
C-C motif chemokine 19 levels	GCST90274765	OP	M13_OSTEOPOROSIS	MR Egger	14021.6	2936	0
C-C motif chemokine 19 levels	GCST90274765	OP	M13_OSTEOPOROSIS	Inverse variance weighted	14025.8	2937	0
C-C motif chemokine 25 levels	GCST90274768	OP	M13_OSTEOPOROSIS	MR Egger	1727.82	1692	0.266692
C-C motif chemokine 25 levels	GCST90274768	OP	M13_OSTEOPOROSIS	Inverse variance weighted	1728.09	1693	0.27083
CD40L receptor levels	GCST90274772	OP	M13_OSTEOPOROSIS	MR Egger	790.776	523	3.01711e-13
CD40L receptor levels	GCST90274772	OP	M13_OSTEOPOROSIS	Inverse variance weighted	790.986	524	3.59257e-13
Protein S100-A12 levels	GCST90274786	OP	M13_OSTEOPOROSIS	MR Egger	51.8083	159	1
Protein S100-A12 levels	GCST90274786	OP	M13_OSTEOPOROSIS	Inverse variance weighted	51.9218	160	1
Fms-related tyrosine kinase 3 ligand levels	GCST90274791	OP	M13_OSTEOPOROSIS	MR Egger	855.296	1058	0.999999
Fms-related tyrosine kinase 3 ligand levels	GCST90274791	OP	M13_OSTEOPOROSIS	Inverse variance weighted	855.402	1059	0.999999
Glial cell line-derived neurotrophic factor levels	GCST90274792	OP	M13_OSTEOPOROSIS	MR Egger	388.972	774	1
Glial cell line-derived neurotrophic factor levels	GCST90274792	OP	M13_OSTEOPOROSIS	Inverse variance weighted	389.404	775	1
Interleukin-18 levels	GCST90274803	OP	M13_OSTEOPOROSIS	MR Egger	670.239	1159	1
Interleukin-18 levels	GCST90274803	OP	M13_OSTEOPOROSIS	Inverse variance weighted	673.701	1160	1
Interleukin-7 levels	GCST90274816	OP	M13_OSTEOPOROSIS	MR Egger	165.035	330	1
Interleukin-7 levels	GCST90274816	OP	M13_OSTEOPOROSIS	Inverse variance weighted	166.349	331	1
Monocyte chemoattractant protein 2 levels	GCST90274822	OP	M13_OSTEOPOROSIS	MR Egger	525.386	788	1
Monocyte chemoattractant protein 2 levels	GCST90274822	OP	M13_OSTEOPOROSIS	Inverse variance weighted	526.597	789	1
Monocyte chemoattractant protein-3 levels	GCST90274823	OP	M13_OSTEOPOROSIS	MR Egger	166.01	378	1
Monocyte chemoattractant protein-3 levels	GCST90274823	OP	M13_OSTEOPOROSIS	Inverse variance weighted	166.101	379	1
Osteoprotegerin levels	GCST90274830	OP	M13_OSTEOPOROSIS	MR Egger	868.899	782	0.0162764
Osteoprotegerin levels	GCST90274830	OP	M13_OSTEOPOROSIS	Inverse variance weighted	871.957	783	0.0144543
Stem cell factor levels	GCST90274833	OP	M13_OSTEOPOROSIS	MR Egger	1255.32	1166	0.0345288
Stem cell factor levels	GCST90274833	OP	M13_OSTEOPOROSIS	Inverse variance weighted	1255.33	1167	0.0360986
Tumor necrosis factor levels	GCST90274839	OP	M13_OSTEOPOROSIS	MR Egger	96.6133	87	0.225525
Tumor necrosis factor levels	GCST90274839	OP	M13_OSTEOPOROSIS	Inverse variance weighted	96.6701	88	0.247269

## Sheet: Supplementary Table 8
Supplementary Table 8. The relevant statistical results of the reverse MR analysis (with IVDD as the exposure and circulating inflammatory cytokines as the outcomes).
Exposure	Exposure.id	Outcome	Outcome.id	egger_intercept	se	pval
OP	M13_OSTEOPOROSIS	Caspase 8 levels	GCST90274763	-0.00464623	0.0321165	0.88971
OP	M13_OSTEOPOROSIS	C-C motif chemokine 19 levels	GCST90274765	-0.00889964	0.0257278	0.741213
OP	M13_OSTEOPOROSIS	C-C motif chemokine 25 levels	GCST90274768	-0.0343224	0.0257012	0.23016
OP	M13_OSTEOPOROSIS	CD40L receptor levels	GCST90274772	0.0021451	0.024673	0.933547
OP	M13_OSTEOPOROSIS	Protein S100-A12 levels	GCST90274786	0.0106384	0.0255521	0.691644
OP	M13_OSTEOPOROSIS	Fms-related tyrosine kinase 3 ligand levels	GCST90274791	-0.0139812	0.0252626	0.599965
OP	M13_OSTEOPOROSIS	Glial cell line-derived neurotrophic factor levels	GCST90274792	0.0214057	0.0276694	0.468528
OP	M13_OSTEOPOROSIS	Interleukin-18 levels	GCST90274803	0.0288238	0.0254145	0.300004
OP	M13_OSTEOPOROSIS	Interleukin-7 levels	GCST90274816	-0.00706564	0.0254637	0.790725
OP	M13_OSTEOPOROSIS	Monocyte chemoattractant protein 2 levels	GCST90274822	0.0183952	0.0255822	0.499138
OP	M13_OSTEOPOROSIS	Monocyte chemoattractant protein-3 levels	GCST90274823	-0.0388596	0.0330288	0.283939
OP	M13_OSTEOPOROSIS	Osteoprotegerin levels	GCST90274830	0.0067129	0.0240897	0.789859
OP	M13_OSTEOPOROSIS	Stem cell factor levels	GCST90274833	-0.0390231	0.0253446	0.17456
OP	M13_OSTEOPOROSIS	Tumor necrosis factor levels	GCST90274839	-0.0157685	0.0285809	0.601072
IVDD	M13_INTERVERTEB	C-X-C motif chemokine 10 levels	GCST90274780	0.010017	0.00987209	0.315934
IVDD	M13_INTERVERTEB	C-X-C motif chemokine 6 levels	GCST90274783	0.00648246	0.0108489	0.553291
IVDD	M13_INTERVERTEB	Delta and Notch-like epidermal growth factor-related receptor levels	GCST90274785	0.00880148	0.00989357	0.378622
IVDD	M13_INTERVERTEB	Protein S100-A12 levels	GCST90274786	0.0145968	0.0103401	0.165241
IVDD	M13_INTERVERTEB	Interleukin-10 levels	GCST90274795	0.0136361	0.00992369	0.176532
IVDD	M13_INTERVERTEB	Neurotrophin-3 levels	GCST90274829	0.00447569	0.0107556	0.679387
IVDD	M13_INTERVERTEB	SIR2-like protein 2 levels	GCST90274834	-0.00451613	0.00989015	0.650236
IVDD	M13_INTERVERTEB	Urokinase-type plasminogen activator levels	GCST90274847	0.00921685	0.00981144	0.352774

## Sheet: Supplementary Table 9
Supplementary Table 9. The statistical results of the reverse MR analysis (with OP as the exposure and circulating inflammatory cytokines as the outcomes).
Exposure	Exposure.id	Outcome	Outcome.id	method	nsnp	b	se	pval	lo_ci	up_ci	or	or_lci95	or_uci95
OP	M13_OSTEOPOROSIS	Caspase 8 levels	GCST90274763	MR Egger	8	0.0426293	0.29741	0.890718	-0.540294	0.625552	1.04355	0.582577	1.86928
OP	M13_OSTEOPOROSIS	Caspase 8 levels	GCST90274763	Weighted median	8	0.0473753	0.066992	0.479455	-0.0839289	0.17868	1.04852	0.919497	1.19564
OP	M13_OSTEOPOROSIS	Caspase 8 levels	GCST90274763	Inverse variance weighted	8	0.000548902	0.0575025	0.992384	-0.112156	0.113254	1.00055	0.893905	1.11992
OP	M13_OSTEOPOROSIS	Caspase 8 levels	GCST90274763	Simple mode	8	0.101858	0.117091	0.413187	-0.127641	0.331357	1.10723	0.880169	1.39286
OP	M13_OSTEOPOROSIS	Caspase 8 levels	GCST90274763	Weighted mode	8	0.103878	0.106053	0.359966	-0.103985	0.311741	1.10947	0.901239	1.3658
OP	M13_OSTEOPOROSIS	C-C motif chemokine 19 levels	GCST90274765	MR Egger	8	0.0431512	0.238366	0.862305	-0.424047	0.510349	1.0441	0.654393	1.66587
OP	M13_OSTEOPOROSIS	C-C motif chemokine 19 levels	GCST90274765	Weighted median	8	-0.0347517	0.0604534	0.565392	-0.15324	0.0837369	0.965845	0.857924	1.08734
OP	M13_OSTEOPOROSIS	C-C motif chemokine 19 levels	GCST90274765	Inverse variance weighted	8	-0.0375029	0.0495416	0.449051	-0.134604	0.0595986	0.963192	0.874062	1.06141
OP	M13_OSTEOPOROSIS	C-C motif chemokine 19 levels	GCST90274765	Simple mode	8	-0.0443217	0.0862387	0.623114	-0.21335	0.124706	0.956646	0.807874	1.13282
OP	M13_OSTEOPOROSIS	C-C motif chemokine 19 levels	GCST90274765	Weighted mode	8	-0.051869	0.087373	0.571422	-0.22312	0.119382	0.949453	0.800019	1.1268
OP	M13_OSTEOPOROSIS	C-C motif chemokine 25 levels	GCST90274768	MR Egger	8	0.366911	0.23792	0.173974	-0.099413	0.833235	1.44327	0.905369	2.30075
OP	M13_OSTEOPOROSIS	C-C motif chemokine 25 levels	GCST90274768	Weighted median	8	0.0518039	0.0610439	0.396085	-0.0678421	0.17145	1.05317	0.934408	1.18702
OP	M13_OSTEOPOROSIS	C-C motif chemokine 25 levels	GCST90274768	Inverse variance weighted	8	0.0562415	0.0525899	0.284873	-0.0468347	0.159318	1.05785	0.954245	1.17271
OP	M13_OSTEOPOROSIS	C-C motif chemokine 25 levels	GCST90274768	Simple mode	8	0.0811903	0.0854419	0.373637	-0.0862758	0.248656	1.08458	0.917341	1.2823
OP	M13_OSTEOPOROSIS	C-C motif chemokine 25 levels	GCST90274768	Weighted mode	8	0.0727109	0.0847737	0.419449	-0.0934455	0.238867	1.07542	0.910788	1.26981
OP	M13_OSTEOPOROSIS	CD40L receptor levels	GCST90274772	MR Egger	8	-0.014691	0.228263	0.950774	-0.462087	0.432705	0.985416	0.629968	1.54142
OP	M13_OSTEOPOROSIS	CD40L receptor levels	GCST90274772	Weighted median	8	-0.0191465	0.0618383	0.756849	-0.14035	0.102057	0.981036	0.869054	1.10745
OP	M13_OSTEOPOROSIS	CD40L receptor levels	GCST90274772	Inverse variance weighted	8	0.00470715	0.0481963	0.922197	-0.0897575	0.0991718	1.00472	0.914153	1.10426
OP	M13_OSTEOPOROSIS	CD40L receptor levels	GCST90274772	Simple mode	8	-0.0236472	0.103176	0.825272	-0.225872	0.178578	0.97663	0.79782	1.19552
OP	M13_OSTEOPOROSIS	CD40L receptor levels	GCST90274772	Weighted mode	8	-0.0277381	0.099704	0.788893	-0.223158	0.167682	0.972643	0.799989	1.18256
OP	M13_OSTEOPOROSIS	Protein S100-A12 levels	GCST90274786	MR Egger	8	-0.123067	0.236589	0.621571	-0.586781	0.340647	0.884204	0.556115	1.40586
OP	M13_OSTEOPOROSIS	Protein S100-A12 levels	GCST90274786	Weighted median	8	0.00478934	0.0645496	0.940854	-0.121728	0.131306	1.0048	0.885389	1.14032
OP	M13_OSTEOPOROSIS	Protein S100-A12 levels	GCST90274786	Inverse variance weighted	8	-0.0267296	0.0493208	0.58785	-0.123398	0.0699391	0.973624	0.883911	1.07244
OP	M13_OSTEOPOROSIS	Protein S100-A12 levels	GCST90274786	Simple mode	8	0.0260528	0.0965296	0.795025	-0.163145	0.215251	1.0264	0.849468	1.24017
OP	M13_OSTEOPOROSIS	Protein S100-A12 levels	GCST90274786	Weighted mode	8	0.0179096	0.09418	0.854579	-0.166683	0.202502	1.01807	0.846468	1.22446
OP	M13_OSTEOPOROSIS	Fms-related tyrosine kinase 3 ligand levels	GCST90274791	MR Egger	8	0.119317	0.233854	0.628118	-0.339037	0.57767	1.12673	0.712456	1.78188
OP	M13_OSTEOPOROSIS	Fms-related tyrosine kinase 3 ligand levels	GCST90274791	Weighted median	8	-0.00802268	0.0618032	0.896717	-0.129157	0.113112	0.992009	0.878836	1.11976
OP	M13_OSTEOPOROSIS	Fms-related tyrosine kinase 3 ligand levels	GCST90274791	Inverse variance weighted	8	-0.00723845	0.0489555	0.882455	-0.103191	0.0887143	0.992788	0.901955	1.09277
OP	M13_OSTEOPOROSIS	Fms-related tyrosine kinase 3 ligand levels	GCST90274791	Simple mode	8	-0.00522484	0.0971809	0.958625	-0.195699	0.18525	0.994789	0.822259	1.20352
OP	M13_OSTEOPOROSIS	Fms-related tyrosine kinase 3 ligand levels	GCST90274791	Weighted mode	8	0.00511685	0.0941328	0.958169	-0.179383	0.189617	1.00513	0.835785	1.20879
OP	M13_OSTEOPOROSIS	Glial cell line-derived neurotrophic factor levels	GCST90274792	MR Egger	8	-0.1658	0.256035	0.541236	-0.667629	0.33603	0.847216	0.512923	1.39938
OP	M13_OSTEOPOROSIS	Glial cell line-derived neurotrophic factor levels	GCST90274792	Weighted median	8	0.0760237	0.064617	0.239384	-0.0506256	0.202673	1.07899	0.950635	1.22467
OP	M13_OSTEOPOROSIS	Glial cell line-derived neurotrophic factor levels	GCST90274792	Inverse variance weighted	8	0.0278484	0.0522609	0.594122	-0.074583	0.13028	1.02824	0.92813	1.13915
OP	M13_OSTEOPOROSIS	Glial cell line-derived neurotrophic factor levels	GCST90274792	Simple mode	8	0.0871153	0.102029	0.421454	-0.112862	0.287092	1.09102	0.893274	1.33255
OP	M13_OSTEOPOROSIS	Glial cell line-derived neurotrophic factor levels	GCST90274792	Weighted mode	8	0.078759	0.101487	0.463127	-0.120155	0.277673	1.08194	0.886783	1.32005
OP	M13_OSTEOPOROSIS	Interleukin-18 levels	GCST90274803	MR Egger	8	-0.219701	0.235238	0.386372	-0.680767	0.241365	0.802759	0.506228	1.27299
OP	M13_OSTEOPOROSIS	Interleukin-18 levels	GCST90274803	Weighted median	8	0.0143434	0.0646463	0.824411	-0.112363	0.14105	1.01445	0.89372	1.15148
OP	M13_OSTEOPOROSIS	Interleukin-18 levels	GCST90274803	Inverse variance weighted	8	0.041181	0.0492471	0.403036	-0.0553434	0.137705	1.04204	0.94616	1.14764
OP	M13_OSTEOPOROSIS	Interleukin-18 levels	GCST90274803	Simple mode	8	-0.0194989	0.105537	0.858657	-0.226352	0.187354	0.98069	0.797438	1.20605
OP	M13_OSTEOPOROSIS	Interleukin-18 levels	GCST90274803	Weighted mode	8	-0.00496561	0.102471	0.962704	-0.205808	0.195877	0.995047	0.813989	1.21638
OP	M13_OSTEOPOROSIS	Interleukin-7 levels	GCST90274816	MR Egger	8	0.135979	0.235744	0.585044	-0.32608	0.598038	1.14566	0.721748	1.81855
OP	M13_OSTEOPOROSIS	Interleukin-7 levels	GCST90274816	Weighted median	8	0.0836151	0.0647473	0.196563	-0.0432896	0.21052	1.08721	0.957634	1.23432
OP	M13_OSTEOPOROSIS	Interleukin-7 levels	GCST90274816	Inverse variance weighted	8	0.0720092	0.0492601	0.143792	-0.0245407	0.168559	1.07467	0.975758	1.1836
OP	M13_OSTEOPOROSIS	Interleukin-7 levels	GCST90274816	Simple mode	8	0.106996	0.0997844	0.319169	-0.0885817	0.302573	1.11293	0.915228	1.35334
OP	M13_OSTEOPOROSIS	Interleukin-7 levels	GCST90274816	Weighted mode	8	0.0952487	0.100217	0.373549	-0.101177	0.291674	1.09993	0.903773	1.33867
OP	M13_OSTEOPOROSIS	Monocyte chemoattractant protein 2 levels	GCST90274822	MR Egger	8	-0.15121	0.236851	0.546781	-0.615437	0.313017	0.859667	0.540404	1.36755
OP	M13_OSTEOPOROSIS	Monocyte chemoattractant protein 2 levels	GCST90274822	Weighted median	8	-0.000800581	0.0628604	0.989839	-0.124007	0.122406	0.9992	0.883374	1.13021
OP	M13_OSTEOPOROSIS	Monocyte chemoattractant protein 2 levels	GCST90274822	Inverse variance weighted	8	0.0153462	0.0494563	0.756335	-0.0815881	0.11228	1.01546	0.921651	1.11883
OP	M13_OSTEOPOROSIS	Monocyte chemoattractant protein 2 levels	GCST90274822	Simple mode	8	-0.0650735	0.1012	0.540695	-0.263425	0.133279	0.936999	0.768415	1.14257
OP	M13_OSTEOPOROSIS	Monocyte chemoattractant protein 2 levels	GCST90274822	Weighted mode	8	-0.0457041	0.10584	0.67886	-0.253151	0.161743	0.955325	0.776351	1.17556
OP	M13_OSTEOPOROSIS	Monocyte chemoattractant protein-3 levels	GCST90274823	MR Egger	8	0.346757	0.30627	0.300762	-0.253532	0.947045	1.41447	0.776055	2.57808
OP	M13_OSTEOPOROSIS	Monocyte chemoattractant protein-3 levels	GCST90274823	Weighted median	8	-0.0371269	0.0759443	0.624933	-0.185978	0.111724	0.963554	0.830292	1.1182
OP	M13_OSTEOPOROSIS	Monocyte chemoattractant protein-3 levels	GCST90274823	Inverse variance weighted	8	-0.0056708	0.0655481	0.931058	-0.134145	0.122803	0.994345	0.874463	1.13066
OP	M13_OSTEOPOROSIS	Monocyte chemoattractant protein-3 levels	GCST90274823	Simple mode	8	-0.0620569	0.103384	0.567253	-0.26469	0.140576	0.939829	0.767444	1.15094
OP	M13_OSTEOPOROSIS	Monocyte chemoattractant protein-3 levels	GCST90274823	Weighted mode	8	-0.060114	0.0989343	0.562628	-0.254025	0.133797	0.941657	0.775672	1.14316
OP	M13_OSTEOPOROSIS	Osteoprotegerin levels	GCST90274830	MR Egger	8	-0.130434	0.222818	0.579623	-0.567157	0.306288	0.877714	0.567136	1.35837
OP	M13_OSTEOPOROSIS	Osteoprotegerin levels	GCST90274830	Weighted median	8	-0.0795618	0.0600009	0.184836	-0.197164	0.0380398	0.923521	0.821056	1.03877
OP	M13_OSTEOPOROSIS	Osteoprotegerin levels	GCST90274830	Inverse variance weighted	8	-0.0697471	0.0471137	0.138767	-0.16209	0.0225958	0.93263	0.850365	1.02285
OP	M13_OSTEOPOROSIS	Osteoprotegerin levels	GCST90274830	Simple mode	8	-0.0888498	0.0864113	0.338059	-0.258216	0.0805165	0.914983	0.772428	1.08385
OP	M13_OSTEOPOROSIS	Osteoprotegerin levels	GCST90274830	Weighted mode	8	-0.0881104	0.0811223	0.313397	-0.24711	0.0708893	0.91566	0.781055	1.07346
OP	M13_OSTEOPOROSIS	Stem cell factor levels	GCST90274833	MR Egger	8	0.308645	0.234735	0.236573	-0.151435	0.768726	1.36158	0.859473	2.15702
OP	M13_OSTEOPOROSIS	Stem cell factor levels	GCST90274833	Weighted median	8	-0.0770875	0.0608848	0.20547	-0.196422	0.0422467	0.925809	0.821666	1.04315
OP	M13_OSTEOPOROSIS	Stem cell factor levels	GCST90274833	Inverse variance weighted	8	-0.0448501	0.0488908	0.358958	-0.140676	0.0509759	0.956141	0.868771	1.0523
OP	M13_OSTEOPOROSIS	Stem cell factor levels	GCST90274833	Simple mode	8	-0.0973921	0.0874341	0.302106	-0.268763	0.0739787	0.9072	0.764324	1.07678
OP	M13_OSTEOPOROSIS	Stem cell factor levels	GCST90274833	Weighted mode	8	-0.0945957	0.0839961	0.297208	-0.259228	0.0700367	0.909741	0.771647	1.07255
OP	M13_OSTEOPOROSIS	Tumor necrosis factor levels	GCST90274839	MR Egger	8	0.106304	0.264757	0.701952	-0.41262	0.625228	1.11216	0.661914	1.86867
OP	M13_OSTEOPOROSIS	Tumor necrosis factor levels	GCST90274839	Weighted median	8	-0.0380178	0.0720961	0.597971	-0.179326	0.103291	0.962696	0.835833	1.10881
OP	M13_OSTEOPOROSIS	Tumor necrosis factor levels	GCST90274839	Inverse variance weighted	8	-0.0365229	0.0554853	0.510381	-0.145274	0.0722282	0.964136	0.864785	1.0749
OP	M13_OSTEOPOROSIS	Tumor necrosis factor levels	GCST90274839	Simple mode	8	0.0455346	0.111534	0.695285	-0.173072	0.264142	1.04659	0.841077	1.30231
OP	M13_OSTEOPOROSIS	Tumor necrosis factor levels	GCST90274839	Weighted mode	8	0.0399197	0.110551	0.728678	-0.17676	0.256599	1.04073	0.837981	1.29253
IVDD	M13_INTERVERTEB	C-X-C motif chemokine 10 levels	GCST90274780	MR Egger	45	-0.145367	0.180277	0.424475	-0.49871	0.207975	0.864705	0.607313	1.23118
IVDD	M13_INTERVERTEB	C-X-C motif chemokine 10 levels	GCST90274780	Weighted median	45	-0.00763799	0.0560848	0.891674	-0.117564	0.102288	0.992391	0.889083	1.1077
IVDD	M13_INTERVERTEB	C-X-C motif chemokine 10 levels	GCST90274780	Inverse variance weighted	45	0.0332282	0.0389832	0.394007	-0.0431788	0.109635	1.03379	0.95774	1.11587
IVDD	M13_INTERVERTEB	C-X-C motif chemokine 10 levels	GCST90274780	Simple mode	45	-0.0604335	0.126405	0.634949	-0.308186	0.187319	0.941356	0.734778	1.20601
IVDD	M13_INTERVERTEB	C-X-C motif chemokine 10 levels	GCST90274780	Weighted mode	45	-0.0814349	0.112814	0.474207	-0.302551	0.139682	0.921793	0.738931	1.14991
IVDD	M13_INTERVERTEB	C-X-C motif chemokine 6 levels	GCST90274783	MR Egger	45	-0.18428	0.198106	0.357456	-0.572568	0.204008	0.831703	0.564075	1.22631
IVDD	M13_INTERVERTEB	C-X-C motif chemokine 6 levels	GCST90274783	Weighted median	45	-0.0453146	0.0573028	0.429065	-0.157628	0.0669988	0.955697	0.854167	1.06929
IVDD	M13_INTERVERTEB	C-X-C motif chemokine 6 levels	GCST90274783	Inverse variance weighted	45	-0.0687089	0.0425357	0.106241	-0.152079	0.014661	0.933598	0.858921	1.01477
IVDD	M13_INTERVERTEB	C-X-C motif chemokine 6 levels	GCST90274783	Simple mode	45	-0.031434	0.128493	0.807875	-0.28328	0.220411	0.969055	0.753309	1.24659
IVDD	M13_INTERVERTEB	C-X-C motif chemokine 6 levels	GCST90274783	Weighted mode	45	0.00899225	0.11155	0.936116	-0.209645	0.227629	1.00903	0.810872	1.25562
IVDD	M13_INTERVERTEB	Delta and Notch-like epidermal growth factor-related receptor levels	GCST90274785	MR Egger	45	-0.172375	0.180795	0.345704	-0.526733	0.181984	0.841664	0.590531	1.19959
IVDD	M13_INTERVERTEB	Delta and Notch-like epidermal growth factor-related receptor levels	GCST90274785	Weighted median	45	-0.042658	0.0562463	0.448202	-0.152901	0.0675847	0.958239	0.858215	1.06992
IVDD	M13_INTERVERTEB	Delta and Notch-like epidermal growth factor-related receptor levels	GCST90274785	Inverse variance weighted	45	-0.0153214	0.0388999	0.693679	-0.0915652	0.0609225	0.984795	0.912502	1.06282
IVDD	M13_INTERVERTEB	Delta and Notch-like epidermal growth factor-related receptor levels	GCST90274785	Simple mode	45	-0.1602	0.143726	0.271064	-0.441903	0.121503	0.851973	0.642812	1.12919
IVDD	M13_INTERVERTEB	Delta and Notch-like epidermal growth factor-related receptor levels	GCST90274785	Weighted mode	45	-0.146475	0.129154	0.262889	-0.399616	0.106666	0.863747	0.670577	1.11256
IVDD	M13_INTERVERTEB	Protein S100-A12 levels	GCST90274786	MR Egger	45	-0.3041	0.188755	0.114478	-0.67406	0.0658586	0.737787	0.509635	1.06808
IVDD	M13_INTERVERTEB	Protein S100-A12 levels	GCST90274786	Weighted median	45	-0.0754725	0.0580153	0.19329	-0.189183	0.0382375	0.927305	0.827635	1.03898
IVDD	M13_INTERVERTEB	Protein S100-A12 levels	GCST90274786	Inverse variance weighted	45	-0.0439468	0.0412813	0.287071	-0.124858	0.0369645	0.957005	0.882622	1.03766
IVDD	M13_INTERVERTEB	Protein S100-A12 levels	GCST90274786	Simple mode	45	-0.0353295	0.12318	0.775603	-0.276763	0.206104	0.965287	0.758234	1.22888
IVDD	M13_INTERVERTEB	Protein S100-A12 levels	GCST90274786	Weighted mode	45	-0.0569926	0.107003	0.596974	-0.266719	0.152734	0.944601	0.765888	1.16502
IVDD	M13_INTERVERTEB	Interleukin-10 levels	GCST90274795	MR Egger	45	-0.266299	0.181256	0.149059	-0.62156	0.0889617	0.76621	0.537106	1.09304
IVDD	M13_INTERVERTEB	Interleukin-10 levels	GCST90274795	Weighted median	45	0.00276603	0.0554713	0.960231	-0.105958	0.11149	1.00277	0.899463	1.11794
IVDD	M13_INTERVERTEB	Interleukin-10 levels	GCST90274795	Inverse variance weighted	45	-0.0231283	0.039191	0.555095	-0.0999427	0.0536861	0.977137	0.904889	1.05515
IVDD	M13_INTERVERTEB	Interleukin-10 levels	GCST90274795	Simple mode	45	0.0255932	0.112723	0.821441	-0.195345	0.246531	1.02592	0.822551	1.27958
IVDD	M13_INTERVERTEB	Interleukin-10 levels	GCST90274795	Weighted mode	45	0.0021741	0.095208	0.981885	-0.184434	0.188782	1.00218	0.831575	1.20778
IVDD	M13_INTERVERTEB	Neurotrophin-3 levels	GCST90274829	MR Egger	45	-0.0696541	0.196448	0.724647	-0.454693	0.315385	0.932716	0.634643	1.37079
IVDD	M13_INTERVERTEB	Neurotrophin-3 levels	GCST90274829	Weighted median	45	-0.0242952	0.0578265	0.674384	-0.137635	0.0890447	0.975998	0.871417	1.09313
IVDD	M13_INTERVERTEB	Neurotrophin-3 levels	GCST90274829	Inverse variance weighted	45	0.0101578	0.0420941	0.809313	-0.0723466	0.0926623	1.01021	0.930208	1.09709
IVDD	M13_INTERVERTEB	Neurotrophin-3 levels	GCST90274829	Simple mode	45	-0.121802	0.136535	0.377196	-0.38941	0.145807	0.885324	0.677456	1.15697
IVDD	M13_INTERVERTEB	Neurotrophin-3 levels	GCST90274829	Weighted mode	45	-0.102275	0.122116	0.406824	-0.341622	0.137072	0.902781	0.710617	1.14691
IVDD	M13_INTERVERTEB	SIR2-like protein 2 levels	GCST90274834	MR Egger	45	0.0204537	0.180552	0.910332	-0.333428	0.374335	1.02066	0.716463	1.45402
IVDD	M13_INTERVERTEB	SIR2-like protein 2 levels	GCST90274834	Weighted median	45	-0.107187	0.0577088	0.0632567	-0.220296	0.0059219	0.898357	0.802281	1.00594
IVDD	M13_INTERVERTEB	SIR2-like protein 2 levels	GCST90274834	Inverse variance weighted	45	-0.0600383	0.0390678	0.124349	-0.136611	0.0165345	0.941728	0.872309	1.01667
IVDD	M13_INTERVERTEB	SIR2-like protein 2 levels	GCST90274834	Simple mode	45	-0.16417	0.117802	0.170435	-0.395061	0.0667217	0.848598	0.673639	1.069
IVDD	M13_INTERVERTEB	SIR2-like protein 2 levels	GCST90274834	Weighted mode	45	-0.150392	0.106943	0.166664	-0.36	0.0592162	0.860371	0.697677	1.061
IVDD	M13_INTERVERTEB	Urokinase-type plasminogen activator levels	GCST90274847	MR Egger	45	-0.16324	0.179211	0.367435	-0.514494	0.188013	0.849387	0.597803	1.20685
IVDD	M13_INTERVERTEB	Urokinase-type plasminogen activator levels	GCST90274847	Weighted median	45	0.00353947	0.0540807	0.947817	-0.102459	0.109538	1.00355	0.902615	1.11576
IVDD	M13_INTERVERTEB	Urokinase-type plasminogen activator levels	GCST90274847	Inverse variance weighted	45	0.00112954	0.038741	0.97674	-0.0748029	0.077062	1.00113	0.927926	1.08011
IVDD	M13_INTERVERTEB	Urokinase-type plasminogen activator levels	GCST90274847	Simple mode	45	0.0551886	0.122259	0.653913	-0.184439	0.294816	1.05674	0.831571	1.34288
IVDD	M13_INTERVERTEB	Urokinase-type plasminogen activator levels	GCST90274847	Weighted mode	45	0.0367994	0.106142	0.73047	-0.17124	0.244838	1.03748	0.84262	1.27741

## Sheet: Supplementary Table 10
Supplementary Table 10. The heterogeneity test results of instrumental variables in the association analysis between circulating inflammatory cytokines and IVDD/OP.
Exposure	Exposure.id	Outcome	Outcome.id	method	Q	Q_df	Q_pval
OP	M13_OSTEOPOROSIS	Caspase 8 levels	GCST90274763	MR Egger	9.52511	6	0.146128
OP	M13_OSTEOPOROSIS	Caspase 8 levels	GCST90274763	Inverse variance weighted	9.55834	7	0.215014
OP	M13_OSTEOPOROSIS	C-C motif chemokine 19 levels	GCST90274765	MR Egger	0.821094	6	0.991496
OP	M13_OSTEOPOROSIS	C-C motif chemokine 19 levels	GCST90274765	Inverse variance weighted	0.940751	7	0.995729
OP	M13_OSTEOPOROSIS	C-C motif chemokine 25 levels	GCST90274768	MR Egger	6.31017	6	0.389356
OP	M13_OSTEOPOROSIS	C-C motif chemokine 25 levels	GCST90274768	Inverse variance weighted	8.18577	7	0.316499
OP	M13_OSTEOPOROSIS	CD40L receptor levels	GCST90274772	MR Egger	4.39957	6	0.622772
OP	M13_OSTEOPOROSIS	CD40L receptor levels	GCST90274772	Inverse variance weighted	4.40712	7	0.73187
OP	M13_OSTEOPOROSIS	Protein S100-A12 levels	GCST90274786	MR Egger	4.8188	6	0.567255
OP	M13_OSTEOPOROSIS	Protein S100-A12 levels	GCST90274786	Inverse variance weighted	4.99213	7	0.660923
OP	M13_OSTEOPOROSIS	Fms-related tyrosine kinase 3 ligand levels	GCST90274791	MR Egger	3.68079	6	0.719782
OP	M13_OSTEOPOROSIS	Fms-related tyrosine kinase 3 ligand levels	GCST90274791	Inverse variance weighted	3.98708	7	0.781265
OP	M13_OSTEOPOROSIS	Glial cell line-derived neurotrophic factor levels	GCST90274792	MR Egger	7.33168	6	0.291259
OP	M13_OSTEOPOROSIS	Glial cell line-derived neurotrophic factor levels	GCST90274792	Inverse variance weighted	8.06301	7	0.327071
OP	M13_OSTEOPOROSIS	Interleukin-18 levels	GCST90274803	MR Egger	3.86457	6	0.694997
OP	M13_OSTEOPOROSIS	Interleukin-18 levels	GCST90274803	Inverse variance weighted	5.15086	7	0.641559
OP	M13_OSTEOPOROSIS	Interleukin-7 levels	GCST90274816	MR Egger	5.26434	6	0.510384
OP	M13_OSTEOPOROSIS	Interleukin-7 levels	GCST90274816	Inverse variance weighted	5.34133	7	0.618384
OP	M13_OSTEOPOROSIS	Monocyte chemoattractant protein 2 levels	GCST90274822	MR Egger	3.80174	6	0.703485
OP	M13_OSTEOPOROSIS	Monocyte chemoattractant protein 2 levels	GCST90274822	Inverse variance weighted	4.31879	7	0.742413
OP	M13_OSTEOPOROSIS	Monocyte chemoattractant protein-3 levels	GCST90274823	MR Egger	7.91212	6	0.244613
OP	M13_OSTEOPOROSIS	Monocyte chemoattractant protein-3 levels	GCST90274823	Inverse variance weighted	9.7375	7	0.203944
OP	M13_OSTEOPOROSIS	Osteoprotegerin levels	GCST90274830	MR Egger	2.22088	6	0.898305
OP	M13_OSTEOPOROSIS	Osteoprotegerin levels	GCST90274830	Inverse variance weighted	2.29854	7	0.941489
OP	M13_OSTEOPOROSIS	Stem cell factor levels	GCST90274833	MR Egger	1.57185	6	0.95458
OP	M13_OSTEOPOROSIS	Stem cell factor levels	GCST90274833	Inverse variance weighted	3.94253	7	0.786373
OP	M13_OSTEOPOROSIS	Tumor necrosis factor levels	GCST90274839	MR Egger	3.14799	6	0.790056
OP	M13_OSTEOPOROSIS	Tumor necrosis factor levels	GCST90274839	Inverse variance weighted	3.45238	7	0.840243
IVDD	M13_INTERVERTEB	C-X-C motif chemokine 10 levels	GCST90274780	MR Egger	35.5553	43	0.78271
IVDD	M13_INTERVERTEB	C-X-C motif chemokine 10 levels	GCST90274780	Inverse variance weighted	36.5849	44	0.778643
IVDD	M13_INTERVERTEB	C-X-C motif chemokine 6 levels	GCST90274783	MR Egger	51.2019	43	0.182831
IVDD	M13_INTERVERTEB	C-X-C motif chemokine 6 levels	GCST90274783	Inverse variance weighted	51.6271	44	0.200318
IVDD	M13_INTERVERTEB	Delta and Notch-like epidermal growth factor-related receptor levels	GCST90274785	MR Egger	45.0516	43	0.386102
IVDD	M13_INTERVERTEB	Delta and Notch-like epidermal growth factor-related receptor levels	GCST90274785	Inverse variance weighted	45.8808	44	0.394119
IVDD	M13_INTERVERTEB	Protein S100-A12 levels	GCST90274786	MR Egger	46.5657	43	0.327856
IVDD	M13_INTERVERTEB	Protein S100-A12 levels	GCST90274786	Inverse variance weighted	48.7237	44	0.288725
IVDD	M13_INTERVERTEB	Interleukin-10 levels	GCST90274795	MR Egger	32.8211	43	0.869727
IVDD	M13_INTERVERTEB	Interleukin-10 levels	GCST90274795	Inverse variance weighted	34.7092	44	0.840793
IVDD	M13_INTERVERTEB	Neurotrophin-3 levels	GCST90274829	MR Egger	51.6774	43	0.171029
IVDD	M13_INTERVERTEB	Neurotrophin-3 levels	GCST90274829	Inverse variance weighted	51.8855	44	0.193466
IVDD	M13_INTERVERTEB	SIR2-like protein 2 levels	GCST90274834	MR Egger	42.6795	43	0.485096
IVDD	M13_INTERVERTEB	SIR2-like protein 2 levels	GCST90274834	Inverse variance weighted	42.888	44	0.519244
IVDD	M13_INTERVERTEB	Urokinase-type plasminogen activator levels	GCST90274847	MR Egger	33.9378	43	0.837061
IVDD	M13_INTERVERTEB	Urokinase-type plasminogen activator levels	GCST90274847	Inverse variance weighted	34.8203	44	0.83741
